# Supplementary material for: Genetic characteristics and phylogenetic analysis of three Chinese ethnic groups using the Huaxia Platinum System
Source: PubMed Central journal article supplement (PMC5799253; doi:10.1038/s41598-018-20871-7), 2018-02-05
Supplement: 41598_2018_20871_MOESM1_ESM.pdf [file 41598_2018_20871_MOESM1_ESM.pdf]

**Supplementary Figure S1 and Supplementary Tables S1-S12**

**Genetic characteristics and phylogenetic analysis of three Chinese ethnic groups using the Huaxia Platinum System**

Mengge Wang<sup>1\*</sup>, Zheng Wang<sup>1\*</sup>, Guanglin He<sup>1</sup>, Zhenjun Jia<sup>2</sup>, Jing Liu<sup>1</sup>, Yiping Hou<sup>1#</sup>

<sup>1</sup> Institute of Forensic Medicine, West China School of Basic Science and Forensic Medicine, Sichuan University, Chengdu 610041, China

<sup>2</sup> Department of Criminal Science and Technology, People's Public Security University of China, Beijing 100038, China

\* These authors contributed equally to this work

# Corresponding author:

Yiping Hou

Institute of Forensic Medicine, West China School of Basic Science and Forensic Medicine, Sichuan University, Chengdu 610041, China

Phone: +86-28-85501550; Fax: +86-28-85501549.

Email address: profhou@yahoo.com, forensic@scu.edu.cn

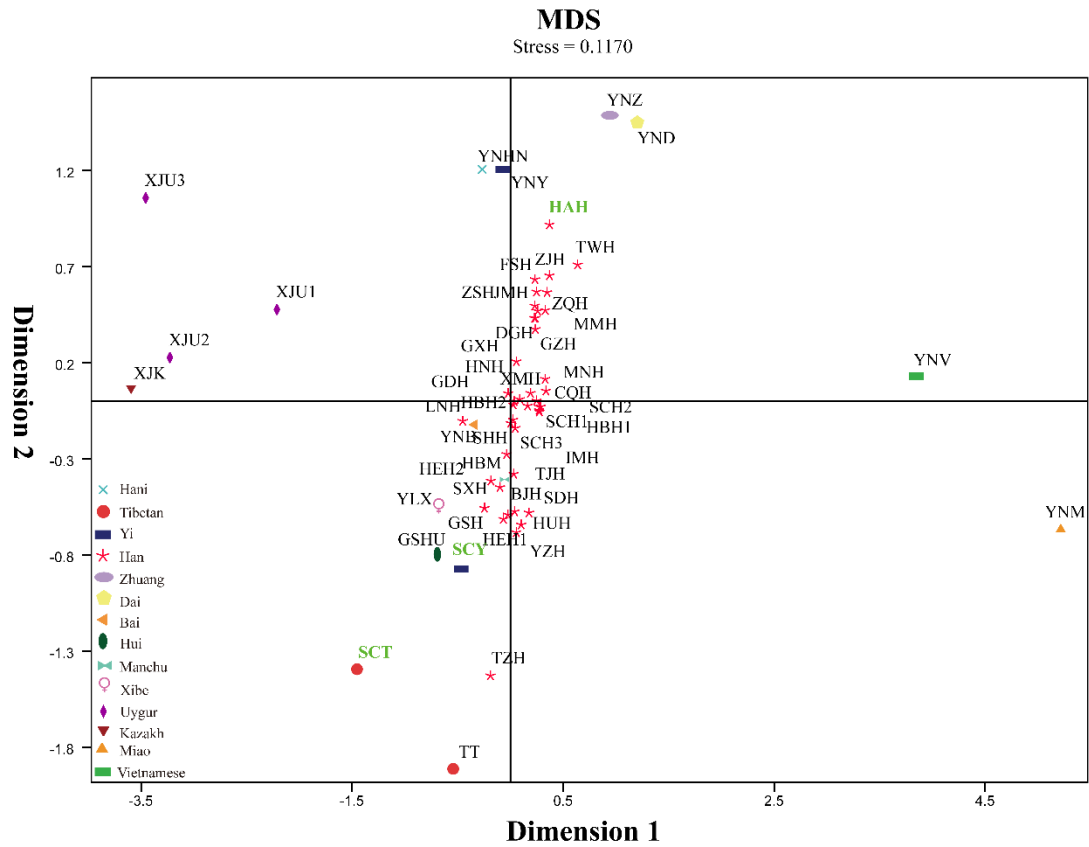

**Supplementary Fig. S1.** Multidimensional Scaling plots of our studied populations (bold and green) and 56 reference Chinese populations (the information of abbreviations is presented in **Table S12**).

**Supplementary Table S1.** p-values of Linkage disequilibrium test between all pairs of 23 STR loci in Hainan Han population (n=193)

| Loci         | [01]   | [02]   | [03]   | [04]   | [05]   | [06]   | [07]   | [08]   | [09]   | [10]   | [11]   | [12]   | [13]   | [14]   | [15]   | [16]   | [17]   | [18]   | [19]   | [20]   | [21]   | [22]   | [23] |
|--------------|--------|--------|--------|--------|--------|--------|--------|--------|--------|--------|--------|--------|--------|--------|--------|--------|--------|--------|--------|--------|--------|--------|------|
| [01]D3S1358  |        |        |        |        |        |        |        |        |        |        |        |        |        |        |        |        |        |        |        |        |        |        |      |
| [02]vWA      | 0.9616 |        |        |        |        |        |        |        |        |        |        |        |        |        |        |        |        |        |        |        |        |        |      |
| [03]D16S539  | 0.2496 | 0.0816 |        |        |        |        |        |        |        |        |        |        |        |        |        |        |        |        |        |        |        |        |      |
| [04]CSF1PO   | 0.4561 | 0.7049 | 0.5201 |        |        |        |        |        |        |        |        |        |        |        |        |        |        |        |        |        |        |        |      |
| [05]TPOX     | 0.6579 | 0.9152 | 0.8942 | 0.2030 |        |        |        |        |        |        |        |        |        |        |        |        |        |        |        |        |        |        |      |
| [06]D8S1179  | 0.8285 | 0.4063 | 0.9051 | 0.1885 | 0.4525 |        |        |        |        |        |        |        |        |        |        |        |        |        |        |        |        |        |      |
| [07]D21S11   | 0.6951 | 0.4327 | 0.9643 | 0.0166 | 0.5572 | 0.8417 |        |        |        |        |        |        |        |        |        |        |        |        |        |        |        |        |      |
| [08]D18S51   | 0.8837 | 0.2084 | 0.3912 | 0.9697 | 0.5865 | 0.6551 | 0.0212 |        |        |        |        |        |        |        |        |        |        |        |        |        |        |        |      |
| [09]Penta E  | 0.4728 | 0.5986 | 0.1746 | 0.5303 | 0.4732 | 0.5355 | 0.4227 | 0.9799 |        |        |        |        |        |        |        |        |        |        |        |        |        |        |      |
| [10]D2S441   | 0.4017 | 0.8737 | 0.1356 | 0.0334 | 0.3720 | 0.2979 | 0.7025 | 0.7422 | 0.6789 |        |        |        |        |        |        |        |        |        |        |        |        |        |      |
| [11]D19S433  | 0.0961 | 0.6481 | 0.2276 | 0.1278 | 0.9288 | 0.7126 | 0.3991 | 0.5617 | 0.4901 | 0.5114 |        |        |        |        |        |        |        |        |        |        |        |        |      |
| [12]TH01     | 0.2438 | 0.5868 | 0.6328 | 0.8553 | 0.8476 | 0.9976 | 0.1356 | 0.2449 | 0.5794 | 0.1310 | 0.6471 |        |        |        |        |        |        |        |        |        |        |        |      |
| [13]FGA      | 0.4818 | 0.7710 | 0.0122 | 0.1765 | 0.7852 | 0.2857 | 0.2491 | 0.5625 | 0.2113 | 0.4204 | 0.3743 | 0.6444 |        |        |        |        |        |        |        |        |        |        |      |
| [14]D22S1045 | 0.7005 | 0.9809 | 0.0122 | 0.2838 | 0.0831 | 0.1696 | 0.9394 | 0.2020 | 0.3433 | 0.0535 | 0.8129 | 0.6697 | 0.0146 |        |        |        |        |        |        |        |        |        |      |
| [15]D5S818   | 0.8501 | 0.2158 | 0.4934 | 0.2025 | 0.1298 | 0.6560 | 0.2471 | 0.9398 | 0.0072 | 0.0841 | 0.5586 | 0.0171 | 0.4464 | 0.5829 |        |        |        |        |        |        |        |        |      |
| [16]D13S317  | 0.0273 | 0.0511 | 0.4607 | 0.8150 | 0.9434 | 0.6275 | 0.9103 | 0.6154 | 0.0562 | 0.4695 | 0.2285 | 0.2527 | 0.0620 | 0.1528 | 0.4995 |        |        |        |        |        |        |        |      |
| [17]D7S820   | 0.2815 | 0.5063 | 0.2905 | 0.5793 | 0.7337 | 0.9609 | 0.0457 | 0.7156 | 0.1755 | 0.0782 | 0.5122 | 0.6831 | 0.9891 | 0.4661 | 0.4143 | 0.5719 |        |        |        |        |        |        |      |
| [18]D6S1043  | 0.0959 | 0.0959 | 0.9415 | 0.4430 | 0.4467 | 0.0198 | 0.6724 | 0.7324 | 0.1605 | 0.2330 | 0.8113 | 0.2784 | 0.8508 | 0.4724 | 0.8788 | 0.6669 | 0.1221 |        |        |        |        |        |      |
| [19]D10S1248 | 0.7809 | 0.2652 | 0.7389 | 0.6502 | 0.1627 | 0.0606 | 0.9866 | 0.0731 | 0.8884 | 0.1152 | 0.5686 | 0.6595 | 0.3165 | 0.8287 | 0.2672 | 0.8992 | 0.7167 | 0.1654 |        |        |        |        |      |
| [20]D1S1656  | 0.1213 | 0.8208 | 0.5106 | 0.4252 | 0.0623 | 0.3540 | 0.3389 | 0.0919 | 0.0452 | 0.4273 | 0.2421 | 0.0871 | 0.0813 | 0.0034 | 0.7946 | 0.4096 | 0.5388 | 0.7389 | 0.9864 |        |        |        |      |
| [21]D12S391  | 0.2736 | 0.8524 | 0.6512 | 0.4625 | 0.3440 | 0.3122 | 0.4762 | 0.2983 | 0.9162 | 0.4200 | 0.2478 | 0.1545 | 0.1672 | 0.4717 | 0.7594 | 0.2870 | 0.5996 | 0.6072 | 0.1081 | 0.4118 |        |        |      |
| [22]D2S1338  | 0.5514 | 0.5290 | 0.5290 | 0.3720 | 0.0450 | 0.0855 | 0.2328 | 0.8119 | 0.5447 | 0.2655 | 0.5255 | 0.3306 | 0.1263 | 0.3034 | 0.3385 | 0.0151 | 0.7726 | 0.0653 | 0.6636 | 0.6280 | 0.4329 |        |      |
| [23]Penta D  | 0.9376 | 0.2544 | 0.7356 | 0.2461 | 0.6616 | 0.2433 | 0.0455 | 0.7637 | 0.3379 | 0.5817 | 0.9963 | 0.7516 | 0.9694 | 0.5701 | 0.8238 | 0.0888 | 0.3856 | 0.4775 | 0.4890 | 0.8898 | 0.6142 | 0.5009 |      |

**Supplementary Table S2.** p-values of Linkage disequilibrium test between all pairs of 23 STR loci in Sichuan Yi population (n=177).

| Loci         | [01]   | [02]   | [03]   | [04]   | [05]   | [06]   | [07]   | [08]   | [09]   | [10]   | [11]   | [12]   | [13]   | [14]   | [15]   | [16]   | [17]   | [18]   | [19]   | [20]   | [21]   | [22]   | [23] |
|--------------|--------|--------|--------|--------|--------|--------|--------|--------|--------|--------|--------|--------|--------|--------|--------|--------|--------|--------|--------|--------|--------|--------|------|
| [01]D3S1358  |        |        |        |        |        |        |        |        |        |        |        |        |        |        |        |        |        |        |        |        |        |        |      |
| [02]vWA      | 0.0093 |        |        |        |        |        |        |        |        |        |        |        |        |        |        |        |        |        |        |        |        |        |      |
| [03]D16S539  | 0.8975 | 0.1048 |        |        |        |        |        |        |        |        |        |        |        |        |        |        |        |        |        |        |        |        |      |
| [04]CSF1PO   | 0.2296 | 0.8761 | 0.3596 |        |        |        |        |        |        |        |        |        |        |        |        |        |        |        |        |        |        |        |      |
| [05]TPOX     | 0.2991 | 0.8693 | 0.7783 | 0.6528 |        |        |        |        |        |        |        |        |        |        |        |        |        |        |        |        |        |        |      |
| [06]D8S1179  | 0.0774 | 0.5353 | 0.7678 | 0.6493 | 0.5042 |        |        |        |        |        |        |        |        |        |        |        |        |        |        |        |        |        |      |
| [07]D21S11   | 0.4426 | 0.0149 | 0.0267 | 0.2840 | 0.2258 | 0.6819 |        |        |        |        |        |        |        |        |        |        |        |        |        |        |        |        |      |
| [08]D18S51   | 0.0043 | 0.1200 | 0.2522 | 0.6515 | 0.8391 | 0.7600 | 0.7692 |        |        |        |        |        |        |        |        |        |        |        |        |        |        |        |      |
| [09]Penta E  | 0.4040 | 0.3966 | 0.5052 | 0.9771 | 0.6545 | 0.3249 | 0.0578 | 0.6089 |        |        |        |        |        |        |        |        |        |        |        |        |        |        |      |
| [10]D2S441   | 0.0805 | 0.1348 | 0.8938 | 0.5898 | 0.8869 | 0.1939 | 0.3389 | 0.8820 | 0.7640 |        |        |        |        |        |        |        |        |        |        |        |        |        |      |
| [11]D19S433  | 0.5126 | 0.8259 | 0.8978 | 0.7831 | 0.6976 | 0.5715 | 0.0062 | 0.0885 | 0.8319 | 0.1102 |        |        |        |        |        |        |        |        |        |        |        |        |      |
| [12]TH01     | 0.2326 | 0.0926 | 0.4575 | 0.2721 | 0.9973 | 0.3047 | 0.8133 | 0.7343 | 0.6336 | 0.7241 | 0.0802 |        |        |        |        |        |        |        |        |        |        |        |      |
| [13]FGA      | 0.9273 | 0.7304 | 0.7660 | 0.9126 | 0.2162 | 0.1690 | 0.3315 | 0.4643 | 0.0816 | 0.0452 | 0.3750 | 0.0090 |        |        |        |        |        |        |        |        |        |        |      |
| [14]D22S1045 | 0.3988 | 0.6294 | 0.6733 | 0.8947 | 0.4327 | 0.4207 | 0.9866 | 0.5085 | 0.3987 | 0.1857 | 0.5415 | 0.3773 | 0.5496 |        |        |        |        |        |        |        |        |        |      |
| [15]D5S818   | 0.7827 | 0.6451 | 0.9049 | 0.7126 | 0.4445 | 0.6520 | 0.3996 | 0.7767 | 0.6318 | 0.1481 | 0.3355 | 0.5753 | 0.3817 | 0.8102 |        |        |        |        |        |        |        |        |      |
| [16]D13S317  | 0.0311 | 0.4655 | 0.0374 | 0.7346 | 0.6955 | 0.8549 | 0.6661 | 0.1278 | 0.9909 | 0.2740 | 0.1527 | 0.3018 | 0.9469 | 0.2248 | 0.7263 |        |        |        |        |        |        |        |      |
| [17]D7S820   | 0.7152 | 0.8378 | 0.7667 | 0.1487 | 0.5693 | 0.5745 | 0.1654 | 0.2600 | 0.0069 | 0.4546 | 0.2688 | 0.3647 | 0.9548 | 0.4314 | 0.7021 | 0.5668 |        |        |        |        |        |        |      |
| [18]D6S1043  | 0.5573 | 0.9137 | 0.2755 | 0.7645 | 0.8810 | 0.9037 | 0.4669 | 0.1406 | 0.1260 | 0.4066 | 0.6220 | 0.4033 | 0.2306 | 0.7683 | 0.2180 | 0.1966 | 0.4528 |        |        |        |        |        |      |
| [19]D10S1248 | 0.2658 | 0.0430 | 0.1291 | 0.0163 | 0.1761 | 0.3098 | 0.5546 | 0.6083 | 0.1376 | 0.0289 | 0.5324 | 0.0836 | 0.7937 | 0.9034 | 0.9225 | 0.9966 | 0.4161 | 0.7235 |        |        |        |        |      |
| [20]D1S1656  | 0.8179 | 0.1555 | 0.6394 | 0.8242 | 0.5238 | 0.1926 | 0.0022 | 0.2250 | 0.2850 | 0.3151 | 0.7146 | 0.5298 | 0.0697 | 0.3495 | 0.5861 | 0.1091 | 0.2682 | 0.5371 | 0.2393 |        |        |        |      |
| [21]D12S391  | 0.2619 | 0.8756 | 0.5339 | 0.0326 | 0.5199 | 0.5266 | 0.4253 | 0.2171 | 0.5198 | 0.3569 | 0.7395 | 0.0469 | 0.0979 | 0.2963 | 0.1518 | 0.9566 | 0.4863 | 0.2410 | 0.7055 | 0.2613 |        |        |      |
| [22]D2S1338  | 0.3532 | 0.1013 | 0.4022 | 0.8093 | 0.9505 | 0.7577 | 0.1847 | 0.3110 | 0.2624 | 0.6516 | 0.5655 | 0.1116 | 0.6388 | 0.2540 | 0.5068 | 0.2093 | 0.1616 | 0.2154 | 0.5896 | 0.1572 | 0.3474 |        |      |
| [23]Penta D  | 0.1756 | 0.2645 | 0.4687 | 0.3425 | 0.2451 | 0.8217 | 0.4625 | 0.3524 | 0.2171 | 0.8102 | 0.6254 | 0.9453 | 0.2136 | 0.3258 | 0.6795 | 0.3694 | 0.0527 | 0.2157 | 0.4761 | 0.0415 | 0.8883 | 0.1232 |      |

**Supplementary Table S3.** p-values of Linkage disequilibrium test between all pairs of 23 STR loci in Sichuan Tibetan population (n=198).

| Loci         | [01]   | [02]   | [03]   | [04]   | [05]   | [06]   | [07]   | [08]   | [09]   | [10]   | [11]   | [12]   | [13]   | [14]   | [15]   | [16]   | [17]   | [18]   | [19]   | [20]   | [21]   | [22]   | [23] |
|--------------|--------|--------|--------|--------|--------|--------|--------|--------|--------|--------|--------|--------|--------|--------|--------|--------|--------|--------|--------|--------|--------|--------|------|
| [01]D3S1358  |        |        |        |        |        |        |        |        |        |        |        |        |        |        |        |        |        |        |        |        |        |        |      |
| [02]vWA      | 0.2424 |        |        |        |        |        |        |        |        |        |        |        |        |        |        |        |        |        |        |        |        |        |      |
| [03]D16S539  | 0.1632 | 0.4554 |        |        |        |        |        |        |        |        |        |        |        |        |        |        |        |        |        |        |        |        |      |
| [04]CSF1PO   | 0.0970 | 0.0172 | 0.8740 |        |        |        |        |        |        |        |        |        |        |        |        |        |        |        |        |        |        |        |      |
| [05]TPOX     | 0.5319 | 0.4833 | 0.9433 | 0.4968 |        |        |        |        |        |        |        |        |        |        |        |        |        |        |        |        |        |        |      |
| [06]D8S1179  | 0.9532 | 0.9049 | 0.8763 | 0.6771 | 0.6675 |        |        |        |        |        |        |        |        |        |        |        |        |        |        |        |        |        |      |
| [07]D21S11   | 0.0013 | 0.4255 | 0.4085 | 0.9891 | 0.1978 | 0.5154 |        |        |        |        |        |        |        |        |        |        |        |        |        |        |        |        |      |
| [08]D18S51   | 0.9609 | 0.7474 | 0.0364 | 0.3890 | 0.2160 | 0.0084 | 0.0106 |        |        |        |        |        |        |        |        |        |        |        |        |        |        |        |      |
| [09]PentaE   | 0.1749 | 0.7938 | 0.9838 | 0.6826 | 0.4163 | 0.7230 | 0.0418 | 0.0661 |        |        |        |        |        |        |        |        |        |        |        |        |        |        |      |
| [10]D2S441   | 0.6280 | 0.4572 | 0.6512 | 0.5358 | 0.3334 | 0.0012 | 0.5363 | 0.3990 | 0.4155 |        |        |        |        |        |        |        |        |        |        |        |        |        |      |
| [11]D19S433  | 0.1441 | 0.7315 | 0.2584 | 0.2582 | 0.0522 | 0.7189 | 0.0891 | 0.5021 | 0.4618 | 0.8842 |        |        |        |        |        |        |        |        |        |        |        |        |      |
| [12]TH01     | 0.0706 | 0.3763 | 0.1170 | 0.6989 | 0.9828 | 0.2496 | 0.0107 | 0.1196 | 0.7198 | 0.3468 | 0.4144 |        |        |        |        |        |        |        |        |        |        |        |      |
| [13]FGA      | 0.3802 | 0.1957 | 0.2809 | 0.3854 | 0.8440 | 0.3697 | 0.7105 | 0.1098 | 0.0068 | 0.4876 | 0.0725 | 0.2462 |        |        |        |        |        |        |        |        |        |        |      |
| [14]D22S1045 | 0.1906 | 0.9643 | 0.3147 | 0.5924 | 0.9541 | 0.4073 | 0.7377 | 0.4216 | 0.5896 | 0.9678 | 0.4785 | 0.2869 | 0.1029 |        |        |        |        |        |        |        |        |        |      |
| [15]D5S818   | 0.2632 | 0.4251 | 0.5930 | 0.9831 | 0.7355 | 0.6059 | 0.9645 | 0.8784 | 0.8363 | 0.4456 | 0.5300 | 0.4203 | 0.4579 | 0.0015 |        |        |        |        |        |        |        |        |      |
| [16]D13S317  | 0.2385 | 0.0066 | 0.8466 | 0.2724 | 0.4810 | 0.7341 | 0.8713 | 0.3813 | 0.2192 | 0.2345 | 0.0452 | 0.6860 | 0.4052 | 0.7541 | 0.9296 |        |        |        |        |        |        |        |      |
| [17]D7S820   | 0.6004 | 0.3365 | 0.6133 | 0.1792 | 0.0625 | 0.2585 | 0.4410 | 0.6058 | 0.9838 | 0.1070 | 0.6078 | 0.4308 | 0.3391 | 0.7310 | 0.8375 | 0.8637 |        |        |        |        |        |        |      |
| [18]D6S1043  | 0.0686 | 0.5551 | 0.3895 | 0.3597 | 0.3824 | 0.3736 | 0.2404 | 0.0140 | 0.0421 | 0.4211 | 0.2557 | 0.7881 | 0.1664 | 0.5248 | 0.6218 | 0.5340 | 0.0936 |        |        |        |        |        |      |
| [19]D10S1248 | 0.5149 | 0.6168 | 0.0509 | 0.3834 | 0.7718 | 0.9779 | 0.2468 | 0.0273 | 0.0292 | 0.3702 | 0.5693 | 0.8675 | 0.9245 | 0.4324 | 0.1367 | 0.8116 | 0.6273 | 0.5287 |        |        |        |        |      |
| [20]D1S1656  | 0.1187 | 0.7127 | 0.1376 | 0.6538 | 0.0922 | 0.9969 | 0.5561 | 0.8315 | 0.0753 | 0.1026 | 0.5338 | 0.2028 | 0.1465 | 0.0178 | 0.1212 | 0.1590 | 0.5141 | 0.0545 | 0.7545 |        |        |        |      |
| [21]D12S391  | 0.3478 | 0.9239 | 0.0118 | 0.6167 | 0.9947 | 0.5374 | 0.4804 | 0.1267 | 0.3761 | 0.2506 | 0.3725 | 0.1123 | 0.3846 | 0.9031 | 0.2480 | 0.2803 | 0.7656 | 0.2567 | 0.2763 | 0.8651 |        |        |      |
| [22]D2S1338  | 0.0189 | 0.2648 | 0.6757 | 0.2937 | 0.9411 | 0.0021 | 0.9884 | 0.6101 | 0.1420 | 0.6539 | 0.2882 | 0.0278 | 0.2017 | 0.3485 | 0.2828 | 0.4097 | 0.4114 | 0.9474 | 0.1659 | 0.8841 | 0.3358 |        |      |
| [23]Penta D  | 0.2576 | 0.7941 | 0.3600 | 0.3266 | 0.1643 | 0.8475 | 0.3795 | 0.6553 | 0.9864 | 0.0068 | 0.4840 | 0.5377 | 0.6032 | 0.6506 | 0.7214 | 0.0504 | 0.1534 | 0.0059 | 0.0084 | 0.5641 | 0.0434 | 0.7512 |      |

**Supplementary Table S4.** Allele frequencies for 23 autosomal STR loci of the Huaxia Platinum system in Hainan Han (n = 193).

| Allele | D3S1358 | vWA    | D16S539 | CSF1PO | TPOX   | D8S1179 | D21S11 | D18S51 | Penta E | D2S441 | D19S433 | TH01   | FGA    | D22S1045 | D5S818 | D13S317 | D7S820 | D6S1043 | D10S1248 | D1S1656 | D12S391 | D2S1338 | Penta D |        |
|--------|---------|--------|---------|--------|--------|---------|--------|--------|---------|--------|---------|--------|--------|----------|--------|---------|--------|---------|----------|---------|---------|---------|---------|--------|
| 5      |         |        |         |        |        |         |        |        | 0.0466  |        |         |        |        |          |        |         |        |         |          |         |         |         |         |        |
| 6      |         |        |         |        |        |         |        |        |         |        |         | 0.1010 |        |          |        |         |        |         |          |         |         |         |         | 0.0026 |
| 7      |         |        |         | 0.0130 |        |         |        |        |         |        |         | 0.2435 |        |          | 0.0311 | 0.0052  | 0.0052 |         |          |         |         |         |         | 0.0155 |
| 8      |         |        | 0.0078  |        | 0.5207 |         |        |        | 0.0026  |        |         | 0.0725 |        |          |        | 0.2694  | 0.1166 |         |          |         |         |         |         | 0.0544 |
| 9      |         |        | 0.2824  | 0.0363 | 0.1425 |         |        |        | 0.0155  | 0.0052 |         | 0.4793 |        |          | 0.0751 | 0.1503  | 0.0725 | 0.0181  |          |         |         |         |         | 0.4067 |
| 9.1    |         |        |         |        |        |         |        |        |         | 0.0389 |         |        |        |          |        |         | 0.0026 |         |          |         |         |         |         |        |
| 9.3    |         |        |         |        |        |         |        |        |         |        |         | 0.0233 |        |          |        |         |        |         |          |         |         |         |         |        |
| 9.4    |         |        |         |        |        |         |        |        | 0.0130  |        |         |        |        |          |        |         |        |         |          |         |         |         |         |        |
| 10     |         |        | 0.1166  | 0.2461 | 0.0285 | 0.1062  |        | 0.0026 | 0.0440  | 0.2098 |         | 0.0725 |        | 0.0026   | 0.1995 | 0.1477  | 0.1762 | 0.0674  |          |         |         |         |         | 0.1166 |
| 10.3   |         |        |         |        |        |         |        |        |         |        |         |        |        |          |        |         |        | 0.0052  |          |         |         |         |         |        |
| 11     |         |        | 0.2694  | 0.2979 | 0.2902 | 0.0959  |        | 0.0026 | 0.1399  | 0.3808 | 0.0052  | 0.0052 |        | 0.1995   | 0.2824 | 0.2461  | 0.3705 | 0.0959  | 0.0026   | 0.0777  |         |         |         | 0.1166 |
| 11.2   |         |        |         |        |        |         |        |        |         |        | 0.0026  |        |        |          |        |         |        |         |          |         |         |         |         | 0.0026 |
| 11.3   |         |        |         |        |        |         |        |        |         |        | 0.0415  |        |        |          |        |         |        |         |          |         |         |         |         |        |
| 12     |         |        | 0.2021  | 0.3238 | 0.0181 | 0.1528  |        | 0.0518 | 0.1140  | 0.1865 | 0.0492  | 0.0026 |        | 0.0026   | 0.2358 | 0.1347  | 0.2124 | 0.1839  | 0.0777   | 0.0440  |         |         |         | 0.1347 |
| 12.2   |         |        |         |        |        |         |        |        |         |        | 0.0026  |        |        |          |        |         |        |         |          |         |         |         |         |        |
| 13     | 0.0026  |        | 0.1062  | 0.0751 |        | 0.1658  |        | 0.1788 | 0.0622  | 0.0104 | 0.2720  |        | 0.0078 |          | 0.1684 | 0.0363  | 0.0389 | 0.1295  | 0.3420   | 0.1088  |         |         |         | 0.0907 |
| 13.2   |         |        |         |        |        |         |        |        |         |        | 0.0337  |        |        |          |        |         |        |         |          |         |         |         |         |        |
| 14     | 0.0363  | 0.3005 | 0.0155  | 0.0078 |        | 0.1762  |        | 0.2098 | 0.0699  | 0.1166 | 0.2176  |        |        | 0.0363   | 0.0078 | 0.0078  | 0.0052 | 0.0674  | 0.2461   | 0.1114  |         |         |         | 0.0466 |
| 14.1   |         |        |         |        |        |         |        |        |         |        | 0.0052  |        |        |          |        |         |        |         |          |         |         |         |         |        |
| 14.2   |         |        |         |        |        |         |        |        |         |        | 0.1373  |        |        |          |        |         |        |         |          |         |         |         |         |        |
| 15     | 0.3342  | 0.0181 |         |        |        | 0.2124  |        | 0.1917 | 0.0751  | 0.0052 | 0.0777  |        |        | 0.2746   |        | 0.0026  |        | 0.0078  | 0.2021   | 0.2876  | 0.0052  |         |         | 0.0104 |
| 15.2   |         |        |         |        |        |         |        |        |         |        | 0.1528  |        |        |          |        |         |        |         |          |         |         |         |         |        |
| 16     | 0.3031  | 0.1477 |         |        |        | 0.0777  |        | 0.1269 | 0.0881  |        | 0.0078  |        |        | 0.2772   |        |         |        | 0.0337  | 0.1114   | 0.1762  | 0.0052  | 0.0207  |         |        |
| 16.2   |         |        |         |        |        |         |        |        |         |        | 0.0337  |        |        |          |        |         |        |         |          |         |         |         |         |        |
| 16.3   |         |        |         |        |        |         |        |        |         |        |         |        |        |          |        |         |        |         |          |         | 0.0052  |         |         |        |
| 17     | 0.2772  | 0.2254 |         |        |        | 0.0130  |        | 0.0829 | 0.0959  |        | 0.0052  |        |        | 0.1788   |        |         |        | 0.1399  | 0.0181   | 0.0984  | 0.0881  | 0.0803  |         |        |
| 17.2   |         |        |         |        |        |         |        |        |         |        | 0.0026  |        |        |          |        |         |        | 0.0026  |          |         |         |         |         |        |
| 17.3   |         |        |         |        |        |         |        |        |         |        |         |        |        |          |        |         |        |         |          |         | 0.0570  |         |         |        |
| 18     | 0.0440  | 0.2073 |         |        |        |         |        | 0.0570 | 0.0751  |        |         |        | 0.0207 | 0.0259   |        |         |        | 0.1891  |          | 0.0078  | 0.1917  | 0.1088  | 0.0026  |        |



33.2

0.0570

34.2

0.0026

---



**Supplementary Table S5.** Allele frequencies for 23 autosomal STR loci of the Huaxia Platinum system in Sichuan Yi (n = 177).

| Allele | D3S1358 | vWA    | D16S539 | CSF1PO | TPOX   | D8S1179 | D21S11 | D18S51 | Penta E | D2S441 | D19S433 | TH01   | FGA    | D22S1045 | D5S818 | D13S317 | D7S820 | D6S1043 | D10S1248 | D1S1656 | D12S391 | D2S1338 | Penta D |        |
|--------|---------|--------|---------|--------|--------|---------|--------|--------|---------|--------|---------|--------|--------|----------|--------|---------|--------|---------|----------|---------|---------|---------|---------|--------|
| 5      |         |        |         |        |        |         |        |        | 0.0198  |        |         |        |        |          |        |         |        |         |          |         |         |         |         |        |
| 6      |         |        |         |        |        |         |        |        |         |        |         | 0.0819 |        |          |        | 0.0028  |        |         |          |         |         |         |         | 0.0056 |
| 7      |         |        |         | 0.0113 |        |         |        |        | 0.0028  |        |         | 0.2994 |        |          | 0.0198 |         |        |         |          |         |         |         |         | 0.0113 |
| 8      |         |        | 0.0367  |        | 0.5056 | 0.0028  |        |        | 0.0085  |        |         | 0.0424 |        |          | 0.0028 | 0.2655  | 0.1667 | 0.0085  |          |         |         |         |         | 0.0367 |
| 8.4    |         |        |         |        |        |         |        |        | 0.0056  |        |         |        |        |          |        |         |        |         |          |         |         |         |         |        |
| 9      |         |        | 0.2203  | 0.0226 | 0.1271 |         |        |        | 0.0226  | 0.0028 |         | 0.4859 |        |          | 0.0593 | 0.1045  | 0.0819 | 0.0028  |          |         |         |         |         | 0.3503 |
| 9.1    |         |        |         |        |        |         |        |        |         |        | 0.0113  |        |        |          |        |         |        |         |          |         |         |         |         |        |
| 9.3    |         |        |         |        |        |         |        |        |         |        |         | 0.0508 |        |          |        |         |        |         |          |         |         |         |         |        |
| 10     | 0.0028  |        | 0.0960  | 0.1921 | 0.0113 | 0.0989  |        |        | 0.0028  | 0.2599 |         | 0.0395 |        |          | 0.1977 | 0.1667  | 0.1638 | 0.0311  |          |         |         |         |         | 0.1102 |
| 10.1   |         |        |         |        |        |         |        |        |         |        |         |        |        |          |        |         |        |         |          |         |         |         |         |        |
| 10.2   |         |        |         |        |        |         |        |        |         |        | 0.0028  |        |        |          |        |         |        |         |          |         |         |         |         |        |
| 11     |         |        | 0.2571  | 0.2458 | 0.3079 | 0.0424  |        |        | 0.1469  | 0.3023 |         |        |        | 0.3107   | 0.3079 | 0.2260  | 0.2571 | 0.1328  | 0.0085   | 0.0763  |         |         |         | 0.1554 |
| 11.3   |         |        |         |        |        |         |        |        |         | 0.0367 |         |        |        |          |        |         |        |         |          |         |         |         |         |        |
| 12     |         |        | 0.2627  | 0.4435 | 0.0480 | 0.1412  |        | 0.0141 | 0.1073  | 0.1441 | 0.0311  |        |        |          | 0.0028 | 0.2373  | 0.1638 | 0.2627  | 0.1158   | 0.0678  | 0.0141  |         |         | 0.1271 |
| 12.1   |         |        |         |        |        | 0.0028  |        |        |         |        |         |        |        |          |        |         |        |         |          |         |         |         |         |        |
| 12.2   |         |        |         |        |        |         |        |        |         |        | 0.0028  |        |        |          |        |         |        |         |          |         |         |         |         |        |
| 12.3   |         |        |         |        |        | 0.0028  |        |        |         |        |         |        |        |          |        |         |        |         |          |         |         |         |         |        |
| 13     |         |        | 0.0989  | 0.0819 |        | 0.2373  |        | 0.2458 | 0.0367  | 0.0367 | 0.2938  |        |        |          | 0.1667 | 0.0565  | 0.0480 | 0.1497  | 0.3729   | 0.1271  |         |         |         | 0.1667 |
| 13.2   |         |        |         |        |        |         |        |        |         | 0.0028 | 0.0367  |        |        |          |        |         |        |         |          |         |         |         |         |        |
| 14     | 0.0311  | 0.1977 | 0.0226  | 0.0028 |        | 0.1949  |        | 0.2345 | 0.1158  | 0.1412 | 0.2232  |        | 0.0028 | 0.0169   | 0.0085 | 0.0141  | 0.0056 | 0.1271  | 0.2373   | 0.1102  | 0.0028  |         |         | 0.0226 |
| 14.1   |         |        |         |        |        |         |        |        |         | 0.0424 |         |        |        |          |        |         |        |         |          |         |         |         |         |        |
| 14.2   |         |        |         |        |        |         |        |        |         |        | 0.1186  |        |        |          |        |         |        |         |          |         |         |         |         |        |
| 15     |         | 0.0226 | 0.0056  |        |        | 0.1921  |        | 0.1158 | 0.1045  | 0.0169 | 0.0593  |        |        |          | 0.2090 |         |        | 0.0169  | 0.1751   | 0.2571  | 0.0028  |         |         | 0.0141 |
| 15.2   |         |        |         |        |        |         |        |        |         |        | 0.1356  |        |        |          |        |         |        |         |          |         |         |         |         |        |
| 16     | 0.3701  | 0.2571 |         |        |        | 0.0791  |        | 0.0847 | 0.0876  | 0.0028 | 0.0282  |        |        |          | 0.2316 |         |        | 0.0056  | 0.1073   | 0.2542  | 0.0028  | 0.0141  |         |        |
| 16.2   |         |        |         |        |        |         |        |        |         |        | 0.0621  |        |        |          |        |         |        |         |          |         |         |         |         |        |
| 17     | 0.1638  | 0.2429 |         |        |        | 0.0056  |        | 0.0989 | 0.0508  |        | 0.0028  |        |        |          | 0.2062 |         |        | 0.0226  | 0.0311   | 0.1102  | 0.1158  | 0.0621  |         |        |
| 17.2   |         |        |         |        |        |         |        |        |         |        | 0.0028  |        |        |          |        |         |        |         |          |         |         |         |         |        |
| 17.3   |         |        |         |        |        |         |        |        |         |        |         |        |        |          |        |         |        |         |          |         | 0.0424  |         |         |        |



|      |        |
|------|--------|
| 32.3 | 0.0028 |
| 33   | 0.0028 |
| 33.2 | 0.0537 |
| 34.2 | 0.0085 |

---

**Supplementary Table S6.** Allele frequencies for 23 autosomal STR loci of the Huaxia Platinum system in Sichuan Tibetan (n = 198).

| Allele | D3S1358 | vWA    | D16S539 | CSF1PO | TPOX   | D8S1179 | D21S11 | D18S51 | Penta E | D2S441 | D19S433 | TH01   | FGA    | D22S1045 | D5S818 | D13S317 | D7S820 | D6S1043 | D10S1248 | D1S1656 | D12S391 | D2S1338 | Penta D |        |
|--------|---------|--------|---------|--------|--------|---------|--------|--------|---------|--------|---------|--------|--------|----------|--------|---------|--------|---------|----------|---------|---------|---------|---------|--------|
| 5      |         |        |         |        |        |         |        |        | 0.0278  |        |         |        |        |          |        | 0.0051  |        |         |          |         |         |         |         |        |
| 6      |         |        |         |        |        |         |        |        |         |        |         | 0.0732 |        |          |        |         |        |         |          |         |         |         |         | 0.0025 |
| 7      |         |        |         | 0.0051 |        |         |        |        |         |        |         | 0.2652 |        |          |        |         | 0.0025 |         |          |         |         |         |         | 0.0051 |
| 8      |         |        | 0.0051  |        | 0.5808 |         |        |        | 0.0025  |        |         | 0.0783 |        |          | 0.0126 | 0.2551  | 0.1768 | 0.0025  |          |         |         |         |         | 0.0833 |
| 9      |         |        | 0.1843  | 0.0404 | 0.1818 |         |        |        | 0.0101  | 0.0025 |         | 0.5076 |        |          | 0.0808 | 0.0909  | 0.0505 |         |          |         |         |         |         | 0.2854 |
| 9.1    |         |        |         |        |        |         |        |        |         | 0.0126 |         |        |        |          |        |         | 0.0025 |         |          |         |         |         |         |        |
| 9.3    |         |        |         |        |        |         |        |        |         |        |         | 0.0606 |        |          |        |         |        |         |          |         |         |         |         |        |
| 10     |         |        | 0.1667  | 0.2652 | 0.0101 | 0.0530  |        |        | 0.0328  | 0.2727 |         | 0.0126 |        |          | 0.1768 | 0.1162  | 0.2071 | 0.0152  |          |         |         |         |         | 0.1338 |
| 10.2   |         |        |         |        |        |         |        |        |         | 0.0025 |         |        |        |          |        |         |        |         |          |         |         |         |         |        |
| 11     |         |        | 0.3990  | 0.2803 | 0.2071 | 0.0429  |        |        | 0.1237  | 0.3510 |         |        |        | 0.3106   | 0.3157 | 0.2475  | 0.2399 | 0.1288  | 0.0025   | 0.0328  |         |         |         | 0.2551 |
| 11.3   |         |        |         |        |        |         |        |        |         | 0.0152 |         |        |        |          |        |         |        |         |          |         |         |         |         |        |
| 12     |         |        | 0.1616  | 0.3308 | 0.0177 | 0.2020  |        | 0.0076 | 0.1111  | 0.1869 | 0.0177  | 0.0025 |        |          | 0.2626 | 0.1919  | 0.2702 | 0.0934  | 0.0631   | 0.0808  |         |         |         | 0.1061 |
| 12.2   |         |        |         |        |        |         |        |        |         |        | 0.0076  |        |        |          |        |         |        |         |          |         |         |         |         |        |
| 13     |         |        | 0.0783  | 0.0581 | 0.0025 | 0.2677  |        | 0.3207 | 0.0253  | 0.0429 | 0.2399  |        |        |          | 0.1439 | 0.0657  | 0.0429 | 0.1591  | 0.3712   | 0.1263  |         |         |         | 0.1061 |
| 13.2   |         |        |         |        |        |         |        |        |         |        | 0.0404  |        |        |          |        |         |        |         |          |         |         |         |         |        |
| 14     | 0.0303  | 0.2273 | 0.0051  | 0.0202 |        | 0.1894  |        | 0.2071 | 0.0783  | 0.1035 | 0.2399  |        |        | 0.0177   | 0.0051 | 0.0278  | 0.0076 | 0.1414  | 0.2399   | 0.0631  |         |         |         | 0.0152 |
| 14.1   |         |        |         |        |        |         |        |        |         | 0.0025 |         |        |        |          |        |         |        |         |          |         |         |         |         |        |
| 14.2   |         |        |         |        |        |         |        |        |         |        | 0.1591  |        |        |          |        |         |        |         |          |         |         |         |         |        |
| 15     | 0.3535  | 0.0101 |         |        |        | 0.1540  |        | 0.1742 | 0.1086  | 0.0051 | 0.0985  |        |        | 0.1768   | 0.0025 |         |        | 0.0051  | 0.1970   | 0.2222  | 0.0152  |         |         | 0.0076 |
| 15.2   |         |        |         |        |        |         |        |        |         |        | 0.1136  |        |        |          |        |         |        |         |          |         |         |         |         |        |
| 16     | 0.3990  | 0.1944 |         |        |        | 0.0859  |        | 0.1010 | 0.0985  | 0.0025 | 0.0278  |        |        | 0.2753   |        |         |        |         | 0.0960   | 0.3333  | 0.0126  | 0.0025  |         |        |
| 16.2   |         |        |         |        |        |         |        |        |         |        | 0.0429  |        |        |          |        |         |        |         |          |         |         |         |         |        |
| 16.3   |         |        |         |        |        |         |        |        |         |        |         |        |        |          |        |         |        |         |          | 0.0025  |         |         |         |        |
| 17     | 0.1616  | 0.2727 |         |        |        | 0.0051  |        | 0.0682 | 0.0657  |        | 0.0076  |        |        | 0.2146   |        |         |        | 0.0379  | 0.0303   | 0.0934  | 0.1061  | 0.0278  |         |        |
| 17.2   |         |        |         |        |        |         |        |        |         |        | 0.0051  |        |        |          |        |         |        |         |          |         |         |         |         |        |
| 17.3   |         |        |         |        |        |         |        |        |         |        |         |        |        |          |        |         |        | 0.0051  |          | 0.0253  |         |         |         |        |
| 18     | 0.0530  | 0.1540 |         |        |        |         |        | 0.0177 | 0.0808  |        |         |        | 0.0126 | 0.0051   |        |         |        | 0.1692  |          | 0.0101  | 0.2576  | 0.0758  |         |        |
| 18.3   |         |        |         |        |        |         |        |        |         |        |         |        |        |          |        |         |        |         |          | 0.0076  |         |         |         |        |
| 19     | 0.0025  | 0.1313 |         |        |        |         |        | 0.0278 | 0.0783  |        |         |        | 0.0505 |          |        |         |        | 0.1364  |          | 0.0025  | 0.2222  | 0.2121  |         |        |

|      |        |  |        |        |  |        |  |        |        |        |
|------|--------|--|--------|--------|--|--------|--|--------|--------|--------|
| 19.3 |        |  |        |        |  | 0.0101 |  |        |        |        |
| 20   | 0.0076 |  | 0.0303 | 0.0556 |  | 0.0328 |  | 0.0783 | 0.1667 | 0.1111 |
| 20.3 |        |  |        |        |  |        |  | 0.0051 |        |        |
| 21   | 0.0025 |  | 0.0202 | 0.0505 |  | 0.0707 |  |        | 0.0682 | 0.0455 |
| 21.3 |        |  |        |        |  |        |  | 0.0126 |        |        |
| 22   |        |  | 0.0177 | 0.0253 |  | 0.1742 |  |        | 0.0783 | 0.0379 |
| 22.2 |        |  |        |        |  | 0.0051 |  |        |        |        |
| 23   |        |  | 0.0025 | 0.0227 |  | 0.2020 |  |        | 0.0657 | 0.2525 |
| 23.2 |        |  |        |        |  | 0.0278 |  |        |        |        |
| 24   |        |  | 0.0025 |        |  | 0.2096 |  |        | 0.0051 | 0.1566 |
| 24.2 |        |  |        |        |  | 0.0101 |  |        |        |        |
| 25   |        |  | 0.0025 |        |  | 0.1263 |  |        | 0.0025 | 0.0556 |
| 25.2 |        |  |        |        |  | 0.0025 |  |        |        |        |
| 26   |        |  |        | 0.0025 |  | 0.0379 |  |        |        | 0.0202 |
| 26.2 |        |  |        |        |  | 0.0076 |  |        |        |        |
| 27   |        |  |        |        |  | 0.0177 |  |        |        | 0.0025 |
| 28   |        |  | 0.0455 |        |  | 0.0126 |  |        |        |        |
| 28.2 |        |  | 0.0177 |        |  |        |  |        |        |        |
| 29   |        |  | 0.2576 |        |  |        |  |        |        |        |
| 29.2 |        |  | 0.0051 |        |  |        |  |        |        |        |
| 30   |        |  | 0.2702 |        |  |        |  |        |        |        |
| 30.2 |        |  | 0.0126 |        |  |        |  |        |        |        |
| 31   |        |  | 0.0732 |        |  |        |  |        |        |        |
| 31.2 |        |  | 0.1035 |        |  |        |  |        |        |        |
| 32   |        |  | 0.0404 |        |  |        |  |        |        |        |
| 32.2 |        |  | 0.0934 |        |  |        |  |        |        |        |
| 33.2 |        |  | 0.0707 |        |  |        |  |        |        |        |
| 34.2 |        |  | 0.0101 |        |  |        |  |        |        |        |

---

**Supplementary Table S7.** Forensic parameters of the Huaxia Platinum System and three compared multiplex amplication kits in three investigated populations.

| Multiplex Amplication Kit   | Hainan Han                        |              | Sichuan Yi                        |              | Sichuan Tibetan                   |             |
|-----------------------------|-----------------------------------|--------------|-----------------------------------|--------------|-----------------------------------|-------------|
|                             | CPD                               | CPE          | CPD                               | CPE          | CPD                               | CPE         |
| Huaxia Platinum System      | 0.9999999999999999999999999999992 | 0.999999999  | 0.9999999999999999999999999999999 | 0.999999998  | 0.9999999999999999999999999999992 | 0.999999995 |
| PowerPlex 21 Kit            | 0.9999999999999999999999999999999 | 0.999999999  | 0.9999999999999999999999999999997 | 0.999999998  | 0.9999999999999999999999999999993 | 0.999999996 |
| Goldeneye DNA ID System 20A | 0.9999999999999999999999999999998 | 0.999999996  | 0.9999999999999999999999999999996 | 0.999999996  | 0.9999999999999999999999999999999 | 0.999999991 |
| AGCU EX22 Kit               | 0.9999999999999999999999999999998 | 0.9999999991 | 0.9999999999999999999999999999997 | 0.9999999991 | 0.9999999999999999999999999999999 | 0.999999998 |

CPD: combined power of discrimination; CPE: combined power of exclusion.

**Supplementary Table S8.** The Fst and corresponding p value of locus-by-locus pairwise comparisons between the Hainan Han and other 58 relative reference populations.

| Loci    |     | Tibet-<br>Tibetan | Sichuan-<br>Han1 | Sichuan-<br>Han2 | Sichuan-<br>Han3 | Chongqing-<br>Han | GansuPingliang-<br>Han | InnerMongolia-<br>Han | Hunan-Han | Henan-<br>Han1 | Henan-<br>Han2 | Hubei-<br>Han1 | Hubei-<br>Han2 | Jiangxi-<br>Han | Guangxi-<br>Han | Guangdong-<br>Han |
|---------|-----|-------------------|------------------|------------------|------------------|-------------------|------------------------|-----------------------|-----------|----------------|----------------|----------------|----------------|-----------------|-----------------|-------------------|
| CSF1PO  | Fst | 0.0047            | 0.0029           | 0.0046           | 0.0013           | 0.0021            | -0.0006                | 0.0009                | 0.0079    | 0.0022         | -0.0004        | 0.0010         | 0.0018         | 0.0020          | 0.0026          | 0.0036            |
|         | p   | 0.1771            | 0.1259           | 0.0431           | 0.2522           | 0.1661            | 0.4426                 | 0.2826                | 0.0154    | 0.1628         | 0.4166         | 0.2592         | 0.1668         | 0.1779          | 0.1278          | 0.0760            |
| D2S1338 | Fst | 0.0022            | 0.0002           | 0.0016           | 0.0014           | 0.0013            | -0.0005                | 0.0034                | 0.0004    | 0.0033         | 0.0023         | 0.0009         | 0.0007         | -0.0011         | -0.0016         | -0.0003           |
|         | p   | 0.2362            | 0.3773           | 0.1339           | 0.2178           | 0.2021            | 0.4835                 | 0.0668                | 0.3334    | 0.0570         | 0.1446         | 0.2626         | 0.2505         | 0.6900          | 0.8555          | 0.4889            |
| D3S1358 | Fst | -0.0040           | -0.0001          | -0.0007          | 0.0013           | -0.0006           | 0.0008                 | 0.0033                | 0.0006    | 0.0047         | 0.0007         | -0.0003        | 0.0012         | -0.0004         | -0.0019         | 0.0009            |
|         | p   | 0.7045            | 0.3809           | 0.5081           | 0.2615           | 0.4730            | 0.3165                 | 0.1292                | 0.3058    | 0.0715         | 0.3132         | 0.4246         | 0.2176         | 0.4335          | 0.7473          | 0.2589            |
| D5S818  | Fst | 0.0033            | -0.0012          | -0.0010          | -0.0031          | -0.0025           | -0.0035                | 0.1131                | -0.0028   | -0.0005        | 0.0012         | -0.0002        | -0.0005        | -0.0007         | -0.0020         | -0.0016           |
|         | p   | 0.2104            | 0.6172           | 0.6363           | 0.9177           | 0.9204            | 0.9046                 | 0.0000                | 0.9758    | 0.4762         | 0.2685         | 0.4263         | 0.5030         | 0.5310          | 0.8374          | 0.7718            |
| D6S1043 | Fst | 0.0023            | 0.0123           | 0.0155           | 0.0124           | 0.0180            | 0.0232                 | 0.0159                | 0.0218    | 0.0340         | 0.0194         | 0.0161         | 0.0164         | 0.0191          | 0.0161          | 0.0159            |
|         | p   | 0.2200            | 0.0000           | 0.0000           | 0.0001           | 0.0000            | 0.0000                 | 0.0000                | 0.0000    | 0.0000         | 0.0000         | 0.0000         | 0.0000         | 0.0000          | 0.0000          | 0.0000            |
| D7S820  | Fst | 0.0074            | -0.0006          | -0.0017          | -0.0022          | -0.0009           | -0.0015                | -0.0029               | -0.0006   | -0.0006        | -0.0022        | -0.0010        | -0.0013        | -0.0019         | -0.0013         | -0.0016           |
|         | p   | 0.0861            | 0.4918           | 0.8206           | 0.7678           | 0.5594            | 0.6031                 | 0.9367                | 0.5091    | 0.4971         | 0.7307         | 0.5838         | 0.7264         | 0.7844          | 0.6674          | 0.7732            |
| D8S1179 | Fst | 0.0016            | -0.0007          | 0.00007          | -0.0009          | 0.0014            | 0.0036                 | -0.0017               | 0.0021    | 0.0025         | -0.0007        | 0.0008         | 0.0007         | 0.0004          | 0.0019          | -0.0011           |
|         | p   | 0.2868            | 0.5772           | 0.3949           | 0.5780           | 0.1962            | 0.1107                 | 0.7643                | 0.1275    | 0.1164         | 0.5293         | 0.2890         | 0.2721         | 0.3438          | 0.1465          | 0.7016            |
| D12S391 | Fst | 0.0005            | -0.0018          | -0.0013          | -0.0007          | -0.0007           | -0.0014                | -0.0006               | -0.0017   | 0.0025         | 0.0003         | 0.0001         | -0.0008        | -0.0022         | -0.0019         | -0.0015           |
|         | p   | 0.3797            | 0.8587           | 0.7833           | 0.5415           | 0.5536            | 0.6316                 | 0.5409                | 0.8274    | 0.0985         | 0.3697         | 0.3904         | 0.6382         | 0.9218          | 0.8829          | 0.8286            |
| D13S317 | Fst | 0.0024            | -0.0015          | -0.0018          | -0.0025          | -0.0022           | -0.0007                | -0.0022               | -0.0028   | -0.0024        | -0.0017        | -0.0019        | -0.0018        | -0.0022         | -0.0007         | -0.0022           |
|         | p   | 0.2405            | 0.7029           | 0.8661           | 0.8386           | 0.8779            | 0.5025                 | 0.8182                | 0.9815    | 0.8959         | 0.6709         | 0.7999         | 0.8666         | 0.8584          | 0.5356          | 0.9302            |
| D16S539 | Fst | -0.0016           | -0.0033          | -0.0026          | -0.0011          | -0.0025           | -0.0041                | 0.0825                | -0.0025   | -0.0028        | -0.0040        | -0.0023        | -0.0018        | -0.0016         | 0.0005          | -0.0020           |
|         | p   | 0.5236            | 0.9993           | 0.9931           | 0.5558           | 0.9133            | 0.9757                 | 0.0000                | 0.9227    | 0.9466         | 0.9855         | 0.8532         | 0.8443         | 0.7157          | 0.3103          | 0.8819            |
| D18S51  | Fst | 0.0052            | -0.0022          | -0.0018          | -0.0028          | -0.0023           | -0.0029                | -0.0023               | -0.0024   | -0.0017        | -0.0030        | -0.0020        | -0.0014        | -0.0022         | 0.0003          | -0.0018           |
|         | p   | 0.1001            | 0.9542           | 0.9563           | 0.9538           | 0.9620            | 0.9211                 | 0.9222                | 0.9826    | 0.8493         | 0.9610         | 0.9092         | 0.8603         | 0.9383          | 0.3477          | 0.9296            |
| D19S433 | Fst | -0.0053           | -0.0027          | -0.0020          | -0.0036          | -0.0026           | -0.0023                | -0.0018               | -0.0024   | -0.0028        | -0.0000 3      | -0.0026        | -0.0016        | -0.0022         | -0.0021         | -0.0009           |
|         | p   | 0.9560            | 0.9852           | 0.9595           | 0.9953           | 0.9792            | 0.7841                 | 0.7864                | 0.9567    | 0.9904         | 0.3972         | 0.9668         | 0.8656         | 0.9077          | 0.9135          | 0.6339            |
| D21S11  | Fst | -0.0003           | -0.0022          | -0.0022          | -0.0031          | -0.0027           | -0.0033                | -0.0022               | -0.0013   | -0.0015        | -0.0031        | -0.0021        | -0.0010        | -0.0025         | -0.0013         | -0.0013           |
|         | p   | 0.4315            | 0.9307           | 0.9843           | 0.9762           | 0.9890            | 0.9406                 | 0.8803                | 0.7102    | 0.7574         | 0.9579         | 0.8893         | 0.6864         | 0.9557          | 0.7264          | 0.7708            |
| FGA     | Fst | 0.0070            | -0.0015          | 0.0004           | 0.0037           | 0.0016            | 0.0022                 | 0.0225                | -0.0005   | 0.0056         | 0.0064         | 0.0021         | 0.0011         | 0.0019          | -0.00009        | 0.0006            |
|         | p   | 0.0491            | 0.8176           | 0.3231           | 0.0696           | 0.1639            | 0.1755                 | 0.0000                | 0.5424    | 0.0143         | 0.0241         | 0.1294         | 0.1936         | 0.1397          | 0.4473          | 0.2830            |

|        |     |         |         |         |         |         |         |         |         |         |         |         |         |         |         |         |
|--------|-----|---------|---------|---------|---------|---------|---------|---------|---------|---------|---------|---------|---------|---------|---------|---------|
| PentaD | Fst | 0.0168  | 0.0022  | 0.0022  | 0.0000  | 0.0017  | 0.0093  | 0.0040  | 0.0008  | 0.0083  | 0.0062  | 0.0045  | 0.0016  | 0.0021  | -0.0016 | 0.0028  |
|        | p   | 0.0077  | 0.1294  | 0.1018  | 0.3917  | 0.1738  | 0.0158  | 0.0689  | 0.2715  | 0.0060  | 0.0357  | 0.0438  | 0.1532  | 0.1505  | 0.7753  | 0.0748  |
| PentaE | Fst | -0.0039 | -0.0008 | -0.0009 | -0.0026 | -0.0013 | 0.0006  | 0.0163  | -0.0016 | -0.0013 | -0.0031 | -0.0017 | -0.0015 | -0.0012 | 0.0025  | -0.0014 |
|        | p   | 0.9449  | 0.6971  | 0.7862  | 0.9772  | 0.8325  | 0.3263  | 0.0000  | 0.9233  | 0.8569  | 0.9930  | 0.9173  | 0.9559  | 0.8031  | 0.0597  | 0.9280  |
| TH01   | Fst | 0.0067  | -0.0015 | -0.0003 | 0.0002  | -0.0011 | 0.0032  | 0.0005  | 0.0003  | -0.0003 | 0.0006  | 0.0010  | -0.0006 | -0.0016 | 0.0022  | -0.0002 |
|        | p   | 0.1178  | 0.6551  | 0.4116  | 0.3472  | 0.5648  | 0.1637  | 0.3101  | 0.3230  | 0.4136  | 0.3047  | 0.2458  | 0.4708  | 0.6556  | 0.1553  | 0.3989  |
| TPOX   | Fst | -0.0001 | -0.0027 | -0.0023 | -0.0039 | -0.0028 | -0.0024 | -0.0023 | -0.0026 | -0.0018 | -0.0009 | -0.0027 | -0.0023 | -0.0024 | -0.0008 | -0.0026 |
|        | p   | 0.3663  | 0.8678  | 0.8902  | 0.9644  | 0.8945  | 0.6185  | 0.7209  | 0.8654  | 0.6461  | 0.4474  | 0.8463  | 0.9141  | 0.7770  | 0.4577  | 0.9407  |
| VWA    | Fst | 0.0039  | -0.0022 | -0.0015 | 0.0017  | -0.0020 | 0.0000  | -0.0005 | -0.0018 | -0.0001 | 0.0024  | -0.0002 | -0.0003 | -0.0014 | -0.0030 | -0.0008 |
|        | p   | 0.1811  | 0.8732  | 0.7889  | 0.2280  | 0.8159  | 0.3950  | 0.4775  | 0.7690  | 0.4098  | 0.1807  | 0.4327  | 0.4727  | 0.6783  | 0.9958  | 0.5797  |

**Continue Table S8:**

| Loci    |     | Guangzhou-<br>Han | Dongguan-<br>Han | Foshan-Han | Jiangmen-<br>Han | Maoming-<br>Han | Qingyuan-<br>Han | Yangjiang-<br>Han | Zhanjiang-<br>Han | Zhaoqing-<br>Han | Zhongshan-<br>Han | Minnan-<br>Han | Minxi-Han | Xiamen-<br>Han | Beijing-<br>Han | Tianjin-<br>Han |
|---------|-----|-------------------|------------------|------------|------------------|-----------------|------------------|-------------------|-------------------|------------------|-------------------|----------------|-----------|----------------|-----------------|-----------------|
| CSFIPO  | Fst | 0.0013            | -0.0019          | 0.0027     | 0.0018           | 0.0012          | 0.0006           | -0.0004           | -0.0021           | 0.0034           | 0.0014            | -0.0017        | 0.0026    | 0.0012         | 0.0065          | -0.0018         |
|         | p   | 0.2095            | 0.7094           | 0.1220     | 0.1675           | 0.2482          | 0.3010           | 0.4340            | 0.7701            | 0.0896           | 0.2257            | 0.6538         | 0.1387    | 0.2108         | 0.0730          | 0.6005          |
| D2S1338 | Fst | -0.0008           | -0.0010          | -0.0010    | -0.0023          | -0.0029         | -0.0014          | -0.0018           | -0.0024           | -0.0014          | -0.0008           | 0.0037         | -0.0022   | 0.0006         | 0.0047          | 0.0001          |
|         | p   | 0.6739            | 0.6439           | 0.6873     | 0.9835           | 0.9833          | 0.8223           | 0.9256            | 0.9460            | 0.8063           | 0.6096            | 0.0620         | 0.9319    | 0.2788         | 0.0615          | 0.3986          |
| D3S1358 | Fst | -0.0014           | -0.0031          | 0.0003     | -0.0025          | -0.0030         | -0.0023          | -0.0019           | -0.0020           | -0.0015          | -0.0026           | -0.0005        | -0.0010   | 0.0003         | -0.0009         | 0.0004          |
|         | p   | 0.6954            | 0.9636           | 0.3300     | 0.9520           | 0.9221          | 0.8872           | 0.8211            | 0.7289            | 0.6757           | 0.9039            | 0.4427         | 0.5217    | 0.3353         | 0.4731          | 0.3522          |
| D5S818  | Fst | -0.0018           | -0.0019          | -0.0019    | -0.0025          | 0.0005          | -0.0017          | -0.0017           | -0.0012           | -0.0012          | -0.0020           | -0.0038        | -0.0018   | -0.0004        | -0.0038         | -0.0018         |
|         | p   | 0.8781            | 0.7491           | 0.8102     | 0.9668           | 0.3125          | 0.8016           | 0.8125            | 0.6201            | 0.6672           | 0.8070            | 0.9986         | 0.7635    | 0.4780         | 0.9156          | 0.6239          |
| D6S1043 | Fst | 0.0170            | 0.0191           | 0.0175     | 0.0148           | 0.0162          | 0.0186           | 0.0161            | 0.0148            | 0.0171           | 0.0183            | 0.0197         | 0.0144    | 0.0167         | 0.0202          | 0.0144          |
|         | p   | 0.0000            | 0.0000           | 0.0000     | 0.0000           | 0.0000          | 0.0000           | 0.0000            | 0.0000            | 0.0000           | 0.0000            | 0.0000         | 0.0000    | 0.0000         | 0.0000          | 0.0000          |
| D7S820  | Fst | -0.0018           | -0.0031          | -0.0027    | -0.0026          | -0.0034         | -0.0006          | -0.0020           | -0.0026           | -0.0024          | -0.0018           | -0.0023        | -0.0013   | -0.0020        | -0.0040         | -0.0031         |
|         | p   | 0.8795            | 0.9796           | 0.9877     | 0.9769           | 0.9955          | 0.5174           | 0.8824            | 0.8984            | 0.9546           | 0.7615            | 0.7927         | 0.6382    | 0.9159         | 0.9444          | 0.8300          |
| D8S1179 | Fst | 0.0005            | -0.0008          | 0.0012     | 0.0005           | 0.0030          | 0.0027           | 0.0009            | 0.0007            | 0.0016           | 0.0015            | -0.0006        | -0.0006   | -0.0004        | 0.0027          | 0.0002          |
|         | p   | 0.3106            | 0.5936           | 0.2085     | 0.3142           | 0.0938          | 0.0770           | 0.2397            | 0.2949            | 0.1566           | 0.1882            | 0.5281         | 0.5487    | 0.5397         | 0.1616          | 0.3922          |
| D12S391 | Fst | -0.0018           | -0.0021          | -0.0024    | -0.0025          | -0.0020         | -0.0025          | -0.0020           | -0.0023           | -0.0019          | -0.0027           | -0.0030        | -0.0021   | -0.0012        | -0.0007         | 0.0005          |
|         | p   | 0.9335            | 0.8840           | 0.9771     | 0.9927           | 0.8376          | 0.9915           | 0.9597            | 0.8998            | 0.9265           | 0.9900            | 0.9736         | 0.9009    | 0.7815         | 0.5135          | 0.3475          |
| D13S317 | Fst | -0.0004           | -0.0024          | -0.0013    | -0.0001          | -0.0004         | -0.0007          | -0.0000           | -0.0014           | -0.0014          | -0.0003           | -0.0026        | -0.0014   | -0.0018        | -0.0038         | -0.0033         |
|         | p   | 0.4952            | 0.8764           | 0.6761     | 0.4070           | 0.4649          | 0.5407           | 0.4196            | 0.6576            | 0.7175           | 0.4606            | 0.8755         | 0.6787    | 0.8848         | 0.9332          | 0.8745          |



|         |     |         |         |         |         |         |         |          |         |         |         |         |         |         |          |         |
|---------|-----|---------|---------|---------|---------|---------|---------|----------|---------|---------|---------|---------|---------|---------|----------|---------|
| D16S539 | Fst | -0.0008 | -0.0025 | 0.0016  | 0.0003  | -0.0026 | -0.0011 | -0.0007  | -0.0014 | -0.0013 | 0.0007  | -0.0032 | -0.0028 | -0.0023 | -0.0050  | -0.0009 |
|         | p   | 0.5687  | 0.8800  | 0.1853  | 0.3552  | 0.8891  | 0.6376  | 0.5331   | 0.6282  | 0.7001  | 0.3006  | 0.9454  | 0.9510  | 0.9694  | 0.9999   | 0.5023  |
| D18S51  | Fst | -0.0020 | -0.0026 | -0.0015 | -0.0015 | -0.0011 | -0.0020 | -0.0013  | -0.0014 | -0.0010 | -0.0010 | -0.0025 | -0.0024 | -0.0020 | -0.0003  | -0.0036 |
|         | p   | 0.9772  | 0.9758  | 0.8411  | 0.8339  | 0.6725  | 0.9579  | 0.8197   | 0.7468  | 0.6893  | 0.6858  | 0.9168  | 0.9645  | 0.9845  | 0.4599   | 0.9695  |
| D19S433 | Fst | -0.0017 | -0.0021 | -0.0015 | -0.0021 | -0.0019 | -0.0013 | -0.0006  | -0.0023 | -0.0014 | -0.0019 | -0.0011 | -0.0021 | -0.0018 | 0.0000 2 | -0.0034 |
|         | p   | 0.9029  | 0.8611  | 0.7789  | 0.9511  | 0.8086  | 0.7441  | 0.5328   | 0.8935  | 0.7745  | 0.8555  | 0.6015  | 0.8955  | 0.9243  | 0.3971   | 0.9271  |
| D21S11  | Fst | -0.0013 | -0.0021 | -0.0006 | -0.0008 | -0.0024 | -0.0015 | -0.0015  | -0.0021 | -0.0012 | -0.0012 | -0.0031 | -0.0018 | -0.0018 | -0.0024  | -0.0035 |
|         | p   | 0.8017  | 0.8588  | 0.5320  | 0.6095  | 0.9047  | 0.8085  | 0.8126   | 0.8642  | 0.7047  | 0.6881  | 0.9787  | 0.8232  | 0.9408  | 0.8007   | 0.9520  |
| FGA     | Fst | -0.0014 | 0.0010  | -0.0012 | -0.0005 | -0.0015 | -0.0010 | -0.0015  | -0.0013 | -0.0008 | -0.0013 | -0.0006 | -0.0004 | 0.0004  | 0.0020   | -0.0009 |
|         | p   | 0.8546  | 0.2426  | 0.7588  | 0.5685  | 0.7722  | 0.6897  | 0.8738   | 0.7258  | 0.6472  | 0.7469  | 0.5329  | 0.5071  | 0.3005  | 0.1951   | 0.5530  |
| PentaD  | Fst | -0.0017 | -0.0013 | -0.0020 | -0.0012 | -0.0015 | -0.0020 | -0.0008  | -0.0030 | -0.0016 | -0.0023 | 0.0011  | -0.0009 | 0.0006  | 0.0066   | 0.0084  |
|         | p   | 0.8824  | 0.6612  | 0.8888  | 0.7052  | 0.7039  | 0.9044  | 0.5941   | 0.9847  | 0.8188  | 0.9369  | 0.2594  | 0.5984  | 0.2814  | 0.0424   | 0.0212  |
| PentaE  | Fst | 0.0001  | 0.0004  | 0.0003  | -0.0006 | 0.0006  | -0.0005 | 0.0000 7 | 0.0015  | 0.0008  | 0.0002  | -0.0021 | -0.0009 | -0.0013 | -0.0032  | -0.0037 |
|         | p   | 0.3872  | 0.3473  | 0.3422  | 0.6545  | 0.3122  | 0.5805  | 0.4066   | 0.1532  | 0.2234  | 0.3783  | 0.9400  | 0.7152  | 0.9080  | 0.9826   | 0.9972  |
| TH01    | Fst | 0.0000  | -0.0004 | 0.0036  | 0.0003  | -0.0006 | 0.0011  | 0.0012   | 0.0000  | 0.0024  | -0.0009 | 0.0017  | -0.0020 | -0.0013 | -0.0007  | -0.0007 |
|         | p   | 0.3731  | 0.4153  | 0.0819  | 0.3246  | 0.4618  | 0.2377  | 0.2246   | 0.3821  | 0.1341  | 0.5173  | 0.2204  | 0.7667  | 0.6872  | 0.4349   | 0.4387  |
| TPOX    | Fst | -0.0014 | -0.0011 | -0.0016 | -0.0011 | -0.0012 | -0.0014 | -0.0013  | -0.0010 | -0.0006 | -0.0013 | -0.0026 | -0.0022 | -0.0020 | -0.0049  | -0.0048 |
|         | p   | 0.6492  | 0.4827  | 0.6275  | 0.5365  | 0.4988  | 0.5990  | 0.5866   | 0.4780  | 0.4479  | 0.5430  | 0.7298  | 0.7380  | 0.8120  | 0.9933   | 0.9757  |
| VWA     | Fst | -0.0021 | -0.0032 | -0.0025 | -0.0021 | -0.0031 | -0.0024 | -0.0025  | -0.0035 | -0.0027 | -0.0027 | 0.0009  | -0.0008 | -0.0004 | 0.0015   | -0.0030 |
|         | p   | 0.9362  | 0.9898  | 0.9504  | 0.9018  | 0.9581  | 0.9522  | 0.9840   | 0.9989  | 0.9921  | 0.9616  | 0.2961  | 0.5554  | 0.4806  | 0.2598   | 0.8199  |

**Continue Table S8:**

|         |     | Shanghai- | Jiangsu-    | Jiangsu-     | Jiangsu-    | Anhui-     | Shandong- | Shanxi- | Jiangxi-     | Yunnan- | Yungui- | Taiwan- | Xinjiang- | Xinjiang- | Xinjiang- | Xinjiang- |
|---------|-----|-----------|-------------|--------------|-------------|------------|-----------|---------|--------------|---------|---------|---------|-----------|-----------|-----------|-----------|
| Loci    |     | Han       | Huai'an-Han | Yangzhou-Han | Taizhou-Han | Suzhou-Han | Han       | Han     | Jiujiang-Han | Han     | Han     | Han     | Uyghur1   | Uyghur2   | Uyghur3   | Kazakh    |
| CSF1PO  | Fst | 0.0031    | 0.0101      | -0.0021      | 0.0054      | 0.0009     | -0.0023   | -0.0011 | 0.0021       | 0.0004  | 0.0021  | 0.0004  | 0.0007    | -0.0035   | 0.0007    | -0.0065   |
|         | p   | 0.1055    | 0.0428      | 0.6124       | 0.1371      | 0.2995     | 0.6690    | 0.5604  | 0.1357       | 0.3223  | 0.1455  | 0.3155  | 0.2783    | 0.8537    | 0.3306    | 0.9046    |
| D2S1338 | Fst | 0.0008    | 0.0041      | 0.0007       | -0.0009     | -0.0004    | 0.0014    | 0.0023  | 0.0005       | 0.0005  | 0.0010  | 0.0013  | 0.0031    | 0.0019    | 0.0005    | -0.0002   |
|         | p   | 0.2588    | 0.1142      | 0.3253       | 0.5224      | 0.4799     | 0.2508    | 0.1116  | 0.3112       | 0.3028  | 0.2163  | 0.1641  | 0.0478    | 0.2105    | 0.3751    | 0.4311    |
| D3S1358 | Fst | 0.0004    | 0.0029      | 0.0038       | -0.0045     | 0.0037     | 0.0009    | -0.0001 | 0.0006       | 0.0007  | -0.0008 | -0.0002 | 0.0015    | 0.0017    | 0.0043    | 0.0061    |
|         | p   | 0.3220    | 0.2120      | 0.1601       | 0.7957      | 0.1533     | 0.3007    | 0.3954  | 0.2950       | 0.2856  | 0.5355  | 0.4043  | 0.1936    | 0.2530    | 0.1895    | 0.1603    |
| D5S818  | Fst | -0.0017   | -0.0047     | -0.0028      | -0.0017     | -0.0029    | -0.0042   | -0.0007 | -0.0019      | -0.0015 | -0.0015 | -0.0021 | 0.0078    | 0.0096    | 0.0022    | -0.0048   |
|         | p   | 0.7530    | 0.9212      | 0.7522       | 0.5452      | 0.7953     | 0.9678    | 0.5243  | 0.9069       | 0.7535  | 0.7559  | 0.9200  | 0.0095    | 0.0243    | 0.2611    | 0.7718    |

|         |     |         |         |         |         |         |         |         |         |         |         |         |         |         |         |         |
|---------|-----|---------|---------|---------|---------|---------|---------|---------|---------|---------|---------|---------|---------|---------|---------|---------|
| D6S1043 | Fst | 0.0162  | 0.0178  | 0.0117  | 0.0166  | 0.0148  | 0.0095  | 0.0127  | 0.0167  | 0.0161  | 0.0164  | 0.0151  | 0.0267  | 0.0214  | 0.0147  | 0.0341  |
|         | p   | 0.0000  | 0.0005  | 0.0018  | 0.0015  | 0.0001  | 0.0044  | 0.0001  | 0.0000  | 0.0000  | 0.0000  | 0.0000  | 0.0000  | 0.0000  | 0.0026  | 0.0000  |
| D7S820  | Fst | -0.0007 | -0.0061 | 0.0009  | -0.0017 | -0.0045 | -0.0037 | -0.0015 | -0.0019 | -0.0021 | -0.0015 | -0.0023 | 0.0081  | 0.0075  | 0.0781  | 0.0140  |
|         | p   | 0.5270  | 0.9997  | 0.3162  | 0.5405  | 0.9844  | 0.9227  | 0.6959  | 0.9024  | 0.9206  | 0.7798  | 0.9582  | 0.0057  | 0.0369  | 0.0000  | 0.0327  |
| D8S1179 | Fst | 0.0025  | -0.0027 | -0.0035 | -0.0026 | 0.0009  | -0.0010 | 0.0047  | -0.0005 | 0.0000  | 0.0010  | -0.0013 | 0.0084  | 0.0072  | 0.0000  | 0.0040  |
|         | p   | 0.1072  | 0.7365  | 0.9142  | 0.7075  | 0.3159  | 0.5592  | 0.0292  | 0.5626  | 0.4233  | 0.2233  | 0.7740  | 0.0021  | 0.0261  | 0.4078  | 0.1863  |
| D12S391 | Fst | -0.0012 | -0.0025 | -0.0012 | -0.0029 | 0.0002  | 0.0018  | 0.0075  | -0.0010 | -0.0008 | 0.0004  | -0.0004 | 0.0004  | -0.0031 | -0.0033 | 0.0078  |
|         | p   | 0.6878  | 0.7366  | 0.6016  | 0.7419  | 0.3742  | 0.2173  | 0.0067  | 0.7293  | 0.6097  | 0.3303  | 0.5241  | 0.3221  | 0.9171  | 0.7940  | 0.0794  |
| D13S317 | Fst | -0.0023 | -0.0039 | -0.0038 | -0.0042 | -0.0022 | -0.0035 | -0.0007 | -0.0022 | -0.0022 | -0.0014 | -0.0018 | 0.0142  | 0.0261  | 0.0018  | 0.0062  |
|         | p   | 0.9026  | 0.8398  | 0.9237  | 0.8457  | 0.6967  | 0.9010  | 0.5337  | 0.9728  | 0.9549  | 0.7683  | 0.8572  | 0.0000  | 0.0000  | 0.2847  | 0.1267  |
| D16S539 | Fst | -0.0013 | -0.0036 | -0.0027 | -0.0030 | -0.0021 | -0.0034 | -0.0035 | -0.0020 | -0.0020 | -0.0022 | -0.0024 | 0.0034  | 0.0015  | 0.0012  | 0.0011  |
|         | p   | 0.6503  | 0.7993  | 0.7417  | 0.6730  | 0.6737  | 0.8683  | 0.9999  | 0.9068  | 0.9090  | 0.9462  | 0.9746  | 0.0654  | 0.2484  | 0.3169  | 0.3433  |
| D18S51  | Fst | -0.0018 | -0.0033 | -0.0022 | -0.0023 | -0.0016 | -0.0006 | -0.0020 | -0.0017 | -0.0018 | -0.0017 | -0.0010 | -0.0015 | -0.0003 | -0.0017 | -0.0041 |
|         | p   | 0.8847  | 0.8481  | 0.7706  | 0.6922  | 0.6689  | 0.5075  | 0.9024  | 0.9282  | 0.9379  | 0.9194  | 0.7169  | 0.8463  | 0.4653  | 0.6057  | 0.8069  |
| D19S433 | Fst | -0.0021 | -0.0036 | -0.0032 | -0.0065 | -0.0016 | -0.0024 | -0.0014 | -0.0017 | -0.0016 | -0.0021 | -0.0022 | 0.0045  | 0.0082  | 0.0010  | 0.0144  |
|         | p   | 0.8952  | 0.8528  | 0.8838  | 0.9996  | 0.6460  | 0.7834  | 0.7018  | 0.9141  | 0.8576  | 0.9777  | 0.9708  | 0.0243  | 0.0210  | 0.3210  | 0.0200  |
| D21S11  | Fst | -0.0020 | 0.0004  | -0.0026 | -0.0034 | 0.0029  | -0.0025 | -0.0011 | -0.0016 | -0.0011 | -0.0018 | -0.0016 | 0.0013  | 0.0036  | -0.0025 | 0.0007  |
|         | p   | 0.8922  | 0.3564  | 0.7922  | 0.7965  | 0.1398  | 0.8052  | 0.6629  | 0.8998  | 0.7027  | 0.9284  | 0.8602  | 0.1809  | 0.1120  | 0.6769  | 0.3417  |
| FGA     | Fst | 0.0007  | -0.0025 | 0.0000  | -0.0010 | 0.0044  | 0.0080  | 0.0025  | 0.0007  | 0.0010  | 0.0012  | -0.0004 | 0.0043  | 0.0005  | 0.0002  | -0.0021 |
|         | p   | 0.2860  | 0.7488  | 0.4048  | 0.5163  | 0.0637  | 0.0154  | 0.1002  | 0.2572  | 0.2120  | 0.1809  | 0.5351  | 0.0201  | 0.3515  | 0.3820  | 0.6144  |
| PentaD  | Fst | 0.0038  | 0.0088  | 0.0160  | 0.0036  | 0.0058  | 0.0049  | 0.0040  | 0.0027  | 0.0022  | 0.0036  | 0.0012  | 0.0119  | 0.0257  | 0.0032  | 0.0210  |
|         | p   | 0.0552  | 0.0362  | 0.0020  | 0.1769  | 0.0582  | 0.0823  | 0.0552  | 0.0747  | 0.1037  | 0.0386  | 0.1927  | 0.0003  | 0.0000  | 0.1943  | 0.0050  |
| PentaE  | Fst | -0.0012 | 0.0005  | -0.0032 | -0.0004 | -0.0024 | -0.0025 | -0.0017 | -0.0014 | -0.0015 | -0.0011 | -0.0008 | 0.0008  | 0.0013  | 0.0005  | -0.0012 |
|         | p   | 0.8074  | 0.3718  | 0.9679  | 0.4904  | 0.9137  | 0.9251  | 0.9275  | 0.9274  | 0.9433  | 0.8253  | 0.7195  | 0.2248  | 0.2330  | 0.3835  | 0.6024  |
| TH01    | Fst | -0.0010 | -0.0027 | 0.0018  | 0.0073  | -0.0002 | 0.0021  | 0.0010  | -0.0006 | 0.0000  | 0.0005  | 0.0001  | 0.0333  | 0.0458  | 0.0314  | 0.0381  |
|         | p   | 0.5341  | 0.6414  | 0.2293  | 0.1027  | 0.3990  | 0.2180  | 0.2499  | 0.4865  | 0.3666  | 0.2969  | 0.3538  | 0.0000  | 0.0000  | 0.0012  | 0.0008  |
| TPOX    | Fst | -0.0025 | -0.0039 | -0.0038 | -0.0061 | -0.0026 | -0.0042 | -0.0020 | -0.0019 | -0.0019 | -0.0012 | -0.0001 | 0.0009  | -0.0017 | -0.0022 | 0.0036  |
|         | p   | 0.8382  | 0.7174  | 0.7848  | 0.9411  | 0.6283  | 0.8938  | 0.6795  | 0.7785  | 0.7595  | 0.5562  | 0.3693  | 0.2491  | 0.5295  | 0.5081  | 0.2337  |
| VWA     | Fst | 0.0026  | 0.0022  | -0.0002 | -0.0054 | 0.0007  | 0.0004  | 0.0003  | -0.0005 | -0.0004 | -0.0008 | 0.0000  | 0.0217  | 0.0184  | 0.0070  | 0.0202  |
|         | p   | 0.1307  | 0.2400  | 0.4188  | 0.9494  | 0.3306  | 0.3531  | 0.3574  | 0.5117  | 0.4886  | 0.5982  | 0.4042  | 0.0000  | 0.0006  | 0.0989  | 0.0082  |

Continue Table S8:

| Loci    |     | HebeiChengde-<br>Manchu | Liaoning-<br>Hui | Gansu-Hui | Yunnan-Bai | Yunnan-<br>Vietnamese | Yunnan-<br>Miao | Yunnan-Yi | Yunnan-<br>Zhuang | Yunnan-<br>Dai | Yunnan-<br>Hani | Yili-Xibe | Liangsha-<br>n-Tibetan | Liangshan-<br>Yi |
|---------|-----|-------------------------|------------------|-----------|------------|-----------------------|-----------------|-----------|-------------------|----------------|-----------------|-----------|------------------------|------------------|
| CSF1PO  | Fst | -0.0007                 | -0.0011          | -0.0011   | -0.0002    | 0.0364                | 0.0452          | 0.0000    | -0.0006           | 0.0050         | -0.0045         | 0.0052    | -0.0043                | 0.0087           |
|         | p   | 0.4759                  | 0.5168           | 0.4911    | 0.4117     | 0.0000                | 0.0000          | 0.3878    | 0.4602            | 0.1586         | 0.9334          | 0.0968    | 0.9495                 | 0.0478           |
| D2S1338 | Fst | -0.0002                 | 0.0012           | 0.0012    | 0.0037     | 0.0089                | 0.0182          | 0.0039    | 0.0004            | -0.0036        | 0.0046          | 0.0026    | 0.0049                 | 0.0009           |
|         | p   | 0.4577                  | 0.2766           | 0.2681    | 0.0309     | 0.0022                | 0.0000          | 0.0399    | 0.3576            | 0.8624         | 0.0788          | 0.1440    | 0.0622                 | 0.3108           |
| D3S1358 | Fst | 0.0064                  | 0.0033           | 0.0001    | 0.0029     | -0.0003               | -0.0005         | 0.0086    | -0.0035           | -0.0052        | -0.0035         | 0.0077    | 0.0112                 | 0.0083           |
|         | p   | 0.0446                  | 0.1570           | 0.3617    | 0.1164     | 0.4059                | 0.4474          | 0.0161    | 0.8653            | 0.8677         | 0.7849          | 0.0507    | 0.0273                 | 0.0594           |
| D5S818  | Fst | -0.0003                 | -0.0034          | 0.0001    | 0.0018     | 0.0000                | 0.0026          | -0.0030   | -0.0017           | -0.0004        | -0.0038         | -0.0008   | -0.0025                | -0.0048          |
|         | p   | 0.4315                  | 0.8912           | 0.3852    | 0.1725     | 0.4087                | 0.1320          | 0.9734    | 0.6302            | 0.4286         | 0.8855          | 0.4980    | 0.7358                 | 0.9873           |
| D6S1043 | Fst | 0.0153                  | 0.0113           | 0.0087    | 0.0128     | 0.0113                | 0.0142          | 0.0184    | 0.0147            | 0.0157         | 0.0118          | 0.0156    | 0.0190                 | 0.0149           |
|         | p   | 0.0000                  | 0.0004           | 0.0055    | 0.0000     | 0.0001                | 0.0000          | 0.0000    | 0.0001            | 0.0020         | 0.0025          | 0.0000    | 0.0000                 | 0.0002           |
| D7S820  | Fst | -0.0012                 | 0.0004           | 0.0016    | 0.0004     | 0.0140                | 0.0158          | 0.0029    | -0.0023           | 0.0005         | -0.0053         | 0.0078    | 0.0092                 | 0.0050           |
|         | p   | 0.5943                  | 0.3543           | 0.2373    | 0.3229     | 0.0014                | 0.0009          | 0.1140    | 0.7511            | 0.3520         | 0.9992          | 0.0371    | 0.0262                 | 0.0895           |
| D8S1179 | Fst | 0.0007                  | -0.0003          | 0.0113    | -0.0006    | 0.0187                | 0.0359          | 0.0005    | 0.0013            | 0.0089         | -0.0008         | 0.0052    | 0.0086                 | 0.0004           |
|         | p   | 0.3167                  | 0.4673           | 0.0034    | 0.5736     | 0.0000                | 0.0000          | 0.3369    | 0.2645            | 0.0301         | 0.5085          | 0.0565    | 0.0172                 | 0.3719           |
| D12S391 | Fst | -0.0002                 | -0.0038          | -0.0010   | 0.0017     | 0.0175                | 0.0325          | 0.0049    | -0.0010           | -0.0027        | -0.0012         | 0.2085    | 0.0025                 | 0.0380           |
|         | p   | 0.4556                  | 0.9830           | 0.5731    | 0.1456     | 0.0000                | 0.0000          | 0.0261    | 0.5980            | 0.7275         | 0.5845          | 0.0000    | 0.1678                 | 0.0000           |
| D13S317 | Fst | -0.0033                 | -0.0033          | 0.0020    | -0.0019    | 0.0352                | 0.0691          | -0.0008   | -0.0003           | -0.0024        | -0.0035         | -0.0032   | 0.0009                 | -0.0021          |
|         | p   | 0.9897                  | 0.8814           | 0.2156    | 0.8439     | 0.0000                | 0.0000          | 0.5537    | 0.4352            | 0.6358         | 0.8568          | 0.8815    | 0.3057                 | 0.6892           |
| D16S539 | Fst | -0.0015                 | -0.0036          | -0.0043   | -0.0020    | 0.0073                | 0.0529          | -0.0017   | 0.0042            | -0.0010        | -0.0029         | -0.0042   | 0.0147                 | -0.0001          |
|         | p   | 0.6495                  | 0.9228           | 0.9889    | 0.8652     | 0.0233                | 0.0000          | 0.7369    | 0.1104            | 0.4764         | 0.7552          | 0.9793    | 0.0053                 | 0.4133           |
| D18S51  | Fst | 0.0002                  | -0.0027          | -0.0034   | -0.0010    | 0.0039                | 0.0081          | -0.0012   | -0.0016           | -0.0049        | 0.0019          | -0.0010   | 0.0094                 | 0.0046           |
|         | p   | 0.3661                  | 0.8985           | 0.9678    | 0.6770     | 0.0540                | 0.0041          | 0.6800    | 0.7010            | 0.9673         | 0.2073          | 0.5754    | 0.0116                 | 0.0717           |
| D19S433 | Fst | -0.0011                 | -0.0030          | 0.0005    | -0.0014    | 0.0131                | 0.0209          | 0.0047    | -0.0020           | -0.0059        | -0.0013         | -0.0024   | -0.0020                | -0.0037          |
|         | p   | 0.6193                  | 0.9074           | 0.3408    | 0.7786     | 0.0010                | 0.0000          | 0.0374    | 0.7687            | 0.9950         | 0.5717          | 0.7905    | 0.7125                 | 0.9518           |
| D21S11  | Fst | 0.0000                  | -0.0029          | -0.0023   | -0.0015    | 0.0060                | 0.0117          | -0.0010   | -0.0018           | -0.0038        | -0.0022         | -0.0009   | -0.0021                | -0.0031          |
|         | p   | 0.3888                  | 0.8847           | 0.8080    | 0.8055     | 0.0167                | 0.0003          | 0.6247    | 0.7159            | 0.8596         | 0.7216          | 0.5283    | 0.7388                 | 0.8852           |
| FGA     | Fst | 0.0027                  | -0.0003          | 0.0022    | 0.0014     | 0.0218                | 0.0373          | 0.0021    | 0.0014            | 0.0001         | -0.0036         | 0.0041    | 0.0052                 | 0.0048           |
|         | p   | 0.1004                  | 0.4535           | 0.1648    | 0.1626     | 0.0000                | 0.0000          | 0.1205    | 0.2362            | 0.4054         | 0.9492          | 0.0776    | 0.0429                 | 0.0657           |

|        |     |         |         |         |         |        |        |         |         |         |         |         |         |         |
|--------|-----|---------|---------|---------|---------|--------|--------|---------|---------|---------|---------|---------|---------|---------|
| PentaD | Fst | 0.0061  | 0.0072  | 0.0176  | 0.0013  | 0.0011 | 0.0013 | 0.0021  | -0.0033 | -0.0037 | 0.0015  | 0.0091  | 0.0186  | 0.0023  |
|        | p   | 0.0263  | 0.0280  | 0.0004  | 0.1958  | 0.2490 | 0.2129 | 0.1535  | 0.9406  | 0.8192  | 0.2564  | 0.0153  | 0.0006  | 0.1984  |
| PentaE | Fst | -0.0021 | -0.0030 | 0.0041  | 0.0003  | 0.0014 | 0.0799 | 0.0034  | 0.0109  | 0.0117  | 0.0041  | -0.0013 | -0.0015 | 0.0005  |
|        | p   | 0.9504  | 0.9812  | 0.0390  | 0.3475  | 0.1504 | 0.0000 | 0.0249  | 0.0009  | 0.0023  | 0.0558  | 0.7481  | 0.7676  | 0.3502  |
| TH01   | Fst | -0.0005 | -0.0004 | -0.0001 | 0.0012  | 0.0052 | 0.0107 | 0.0036  | 0.0082  | -0.0008 | -0.0019 | 0.0015  | 0.0003  | -0.0005 |
|        | p   | 0.4449  | 0.4168  | 0.3916  | 0.2180  | 0.0580 | 0.0086 | 0.0978  | 0.0440  | 0.4406  | 0.5839  | 0.2514  | 0.3446  | 0.4078  |
| TPOX   | Fst | -0.0023 | -0.0039 | -0.0044 | -0.0028 | 0.0561 | 0.0674 | -0.0020 | -0.0024 | -0.0015 | 0.0021  | -0.0035 | 0.0047  | -0.0035 |
|        | p   | 0.7074  | 0.8899  | 0.9551  | 0.9639  | 0.0000 | 0.0000 | 0.6881  | 0.6391  | 0.4499  | 0.2417  | 0.8271  | 0.1356  | 0.7406  |
| VWA    | Fst | 0.0032  | 0.0016  | -0.0014 | 0.0019  | 0.0012 | 0.0068 | -0.0019 | -0.0025 | -0.0035 | 0.0025  | 0.0039  | 0.0043  | 0.0113  |
|        | p   | 0.1129  | 0.2469  | 0.5819  | 0.1579  | 0.2467 | 0.0217 | 0.7850  | 0.7753  | 0.7515  | 0.2025  | 0.1106  | 0.1198  | 0.0141  |

---

**Supplementary Table S9.** The  $F_{st}$  and corresponding p value of locus-by-locus pairwise comparisons between the Sichuan Yi and other 58 relative reference populations.

| Loci    |     | Tibet-<br>Tibetan | Sichuan-<br>Han1 | Sichuan-<br>Han2 | Sichuan-<br>Han3 | Chongqing-<br>Han | GansuPingliang-<br>Han | InnerMongolia-<br>Han | Hunan-Han | Henan-<br>Han1 | Henan-<br>Han2 | Hubei-<br>Han1 | Hubei-<br>Han2 | Jiangxi-<br>Han | Guangxi-<br>Han | Guangdong-<br>Han |
|---------|-----|-------------------|------------------|------------------|------------------|-------------------|------------------------|-----------------------|-----------|----------------|----------------|----------------|----------------|-----------------|-----------------|-------------------|
| CSF1PO  | Fst | -0.0059           | 0.0028           | 0.0003           | 0.0006           | 0.0005            | 0.0016                 | -0.0011               | 0.0011    | 0.0026         | 0.0008         | 0.0003         | 0.0026         | 0.0025          | -0.0013         | 0.0004            |
|         | p   | 0.8895            | 0.1342           | 0.3398           | 0.3207           | 0.3167            | 0.2547                 | 0.5302                | 0.2570    | 0.1550         | 0.3143         | 0.3486         | 0.1198         | 0.1548          | 0.6006          | 0.3213            |
| D2S1338 | Fst | 0.0001            | -0.0023          | -0.0019          | -0.0023          | -0.0027           | -0.0028                | -0.0018               | -0.0018   | -0.0024        | -0.0030        | -0.0021        | -0.0018        | -0.0021         | 0.0010          | -0.0019           |
|         | p   | 0.4037            | 0.9267           | 0.9342           | 0.8663           | 0.9798            | 0.8757                 | 0.8010                | 0.8549    | 0.9405         | 0.9387         | 0.8935         | 0.9028         | 0.8945          | 0.2315          | 0.9222            |
| D3S1358 | Fst | 0.0105            | 0.0011           | 0.0032           | -0.0009          | 0.0024            | -0.0012                | -0.0005               | -0.0001   | -0.0012        | -0.0017        | 0.0005         | 0.0010         | 0.0015          | 0.0123          | 0.0022            |
|         | p   | 0.0691            | 0.2622           | 0.1000           | 0.4791           | 0.1683            | 0.5007                 | 0.4360                | 0.3764    | 0.5443         | 0.5817         | 0.3183         | 0.2438         | 0.2261          | 0.0054          | 0.1620            |
| D5S818  | Fst | -0.0003           | -0.0020          | -0.0020          | -0.0037          | -0.0030           | -0.0034                | 0.1208                | -0.0028   | -0.0021        | -0.0014        | -0.0018        | -0.0016        | -0.0018         | -0.0021         | -0.0026           |
|         | p   | 0.4158            | 0.7739           | 0.8759           | 0.9671           | 0.9796            | 0.8637                 | 0.0000                | 0.9507    | 0.7994         | 0.5698         | 0.7287         | 0.7536         | 0.7169          | 0.8126          | 0.9682            |
| D6S1043 | Fst | -0.0025           | -0.0013          | -0.0020          | -0.0023          | -0.0008           | 0.0005                 | -0.0023               | -0.0013   | 0.0188         | -0.0012        | -0.0019        | -0.0013        | -0.0016         | -0.0022         | -0.0022           |
|         | p   | 0.7118            | 0.7302           | 0.9457           | 0.8629           | 0.6014            | 0.3421                 | 0.9053                | 0.7341    | 0.0000         | 0.6279         | 0.8702         | 0.7884         | 0.7748          | 0.9289          | 0.9573            |
| D7S820  | Fst | -0.0057           | 0.0032           | 0.0045           | 0.0002           | 0.0066            | 0.0005                 | 0.0024                | 0.0042    | 0.0004         | 0.0000         | 0.0012         | 0.0041         | 0.0083          | 0.0159          | 0.0025            |
|         | p   | 0.9267            | 0.1013           | 0.0427           | 0.3747           | 0.0241            | 0.3425                 | 0.1614                | 0.0650    | 0.3487         | 0.3933         | 0.2539         | 0.0448         | 0.0112          | 0.0005          | 0.1160            |
| D8S1179 | Fst | -0.0054           | 0.0010           | 0.0008           | -0.0019          | 0.0014            | -0.0027                | -0.0010               | 0.0035    | -0.0018        | -0.0037        | -0.0012        | 0.0000         | 0.0021          | 0.0116          | 0.0015            |
|         | p   | 0.9312            | 0.2560           | 0.2618           | 0.7546           | 0.2139            | 0.8080                 | 0.6095                | 0.0622    | 0.7941         | 0.9725         | 0.6585         | 0.4116         | 0.1561          | 0.0005          | 0.1832            |
| D12S391 | Fst | 0.0360            | 0.0417           | 0.0410           | 0.0432           | 0.0432            | 0.0421                 | 0.0433                | 0.0394    | 0.0450         | 0.0407         | 0.0428         | 0.0405         | 0.0418          | 0.0385          | 0.0393            |
|         | p   | 0.0000            | 0.0000           | 0.0000           | 0.0000           | 0.0000            | 0.0000                 | 0.0000                | 0.0000    | 0.0000         | 0.0000         | 0.0000         | 0.0000         | 0.0000          | 0.0000          | 0.0000            |
| D13S317 | Fst | -0.0045           | 0.0014           | 0.0003           | -0.0011          | 0.0004            | -0.0011                | -0.0017               | -0.0008   | -0.0010        | -0.0036        | -0.0007        | -0.0003        | -0.0003         | 0.0023          | -0.0017           |
|         | p   | 0.8282            | 0.2248           | 0.3481           | 0.5668           | 0.3421            | 0.5644                 | 0.7032                | 0.5466    | 0.5884         | 0.9531         | 0.5262         | 0.4593         | 0.4495          | 0.1467          | 0.7918            |
| D16S539 | Fst | -0.0001           | 0.0007           | 0.0011           | 0.0037           | 0.0016            | -0.0011                | 0.0805                | -0.0001   | 0.0007         | -0.0005        | -0.0008        | 0.0012         | 0.0010          | 0.0001          | -0.0004           |
|         | p   | 0.4093            | 0.2997           | 0.2388           | 0.1185           | 0.2116            | 0.5388                 | 0.0000                | 0.4124    | 0.3072         | 0.4660         | 0.5360         | 0.2239         | 0.2648          | 0.3807          | 0.4778            |
| D18S51  | Fst | -0.0030           | 0.0075           | 0.0045           | 0.0032           | 0.0079            | 0.0042                 | 0.0011                | 0.0079    | 0.0049         | 0.0009         | 0.0021         | 0.0043         | 0.0063          | 0.0181          | 0.0043            |
|         | p   | 0.7453            | 0.0056           | 0.0190           | 0.0966           | 0.0035            | 0.0849                 | 0.2552                | 0.0025    | 0.0280         | 0.2878         | 0.1340         | 0.0240         | 0.0107          | 0.0000          | 0.0277            |
| D19S433 | Fst | -0.0037           | -0.0028          | -0.0020          | -0.0025          | -0.0017           | -0.0019                | -0.0017               | -0.0020   | -0.0018        | -0.0016        | -0.0024        | -0.0018        | -0.0022         | -0.0020         | -0.0013           |
|         | p   | 0.7982            | 0.9817           | 0.9348           | 0.8605           | 0.7827            | 0.6907                 | 0.7275                | 0.8615    | 0.7974         | 0.6678         | 0.9185         | 0.8722         | 0.8700          | 0.8655          | 0.7291            |
| D21S11  | Fst | -0.0052           | -0.0020          | -0.0011          | -0.0016          | -0.0014           | -0.0036                | -0.0009               | -0.0016   | -0.0016        | -0.0024        | -0.0017        | -0.0011        | -0.0005         | -0.0001         | -0.0008           |
|         | p   | 0.9557            | 0.8746           | 0.6972           | 0.7022           | 0.7167            | 0.9603                 | 0.5597                | 0.7611    | 0.7516         | 0.8371         | 0.7757         | 0.6789         | 0.4990          | 0.4225          | 0.5922            |
| FGA     | Fst | 0.0026            | 0.0011           | 0.0013           | 0.0009           | 0.0021            | 0.0011                 | 0.0088                | 0.0007    | 0.0003         | -0.0017        | 0.0008         | 0.0004         | 0.0003          | 0.0054          | 0.0013            |
|         | p   | 0.2140            | 0.2271           | 0.1900           | 0.2694           | 0.1365            | 0.2786                 | 0.0053                | 0.2852    | 0.3694         | 0.7097         | 0.2733         | 0.3158         | 0.3557          | 0.0122          | 0.1860            |

|        |     |         |         |         |         |         |         |         |         |         |         |         |         |         |         |         |
|--------|-----|---------|---------|---------|---------|---------|---------|---------|---------|---------|---------|---------|---------|---------|---------|---------|
| PentaD | Fst | 0.0046  | 0.0011  | -0.0003 | -0.0029 | -0.0002 | -0.0010 | 0.0016  | -0.0008 | 0.0003  | 0.0013  | 0.0009  | 0.0003  | 0.0014  | 0.0035  | 0.0014  |
|        | p   | 0.1499  | 0.2408  | 0.4555  | 0.8902  | 0.4294  | 0.5321  | 0.2035  | 0.5823  | 0.3624  | 0.2595  | 0.2802  | 0.3374  | 0.2219  | 0.0724  | 0.1962  |
| PentaE | Fst | -0.0015 | 0.0007  | 0.0011  | -0.0004 | 0.0012  | 0.0014  | 0.0181  | 0.0018  | 0.0002  | 0.0003  | 0.0009  | 0.0010  | 0.0008  | 0.0049  | 0.0004  |
|        | p   | 0.6429  | 0.2780  | 0.1673  | 0.5201  | 0.1848  | 0.2258  | 0.0000  | 0.1134  | 0.3902  | 0.3798  | 0.2389  | 0.1864  | 0.2542  | 0.0089  | 0.3207  |
| TH01   | Fst | -0.0032 | -0.0015 | -0.0018 | -0.0038 | -0.0026 | -0.0041 | -0.0025 | -0.0024 | -0.0022 | -0.0032 | -0.0014 | -0.0014 | -0.0021 | -0.0001 | -0.0022 |
|        | p   | 0.6184  | 0.6266  | 0.7580  | 0.9659  | 0.8739  | 0.9245  | 0.7725  | 0.8337  | 0.7703  | 0.8270  | 0.5780  | 0.6472  | 0.7347  | 0.3865  | 0.8548  |
| TPOX   | Fst | -0.0022 | -0.0027 | -0.0018 | -0.0034 | -0.0026 | -0.0042 | -0.0032 | -0.0028 | -0.0030 | -0.0023 | -0.0029 | -0.0013 | -0.0008 | -0.0008 | -0.0023 |
|        | p   | 0.4982  | 0.8297  | 0.6986  | 0.8508  | 0.7966  | 0.9052  | 0.8823  | 0.8710  | 0.8921  | 0.6132  | 0.8507  | 0.5857  | 0.4440  | 0.4752  | 0.8122  |
| VWA    | Fst | -0.0019 | 0.0065  | 0.0065  | -0.0011 | 0.0058  | 0.0032  | 0.0026  | 0.0056  | 0.0024  | -0.0001 | 0.0019  | 0.0045  | 0.0060  | 0.0136  | 0.0055  |
|        | p   | 0.4982  | 0.8297  | 0.6986  | 0.8508  | 0.7966  | 0.9052  | 0.8823  | 0.8710  | 0.8921  | 0.6132  | 0.8507  | 0.5857  | 0.4440  | 0.4752  | 0.8122  |

Continue Table S9:

| Loci    |     | Guangzhou- | Dongguan- | Foshan-Han | Jiangmen- | Maoming- | Qingyuan- | Yangjiang- | Zhanjiang- | Zhaoqing- | Zhongshan- | Minnan- | Minxi-Han | Xiamen- | Beijing- | Tianjin- |
|---------|-----|------------|-----------|------------|-----------|----------|-----------|------------|------------|-----------|------------|---------|-----------|---------|----------|----------|
|         |     | Han        | Han       |            | Han-      | Han      | Han       | Han        | Han        | Han       | Han        | Han     |           | Han     | Han      |          |
| CSF1PO  | Fst | 0.0009     | 0.0030    | -0.0012    | -0.0003   | -0.0013  | 0.0004    | 0.0032     | 0.0048     | -0.0005   | -0.0005    | 0.0024  | -0.0001   | 0.0032  | 0.0024   | 0.0018   |
|         | p   | 0.2579     | 0.1420    | 0.5981     | 0.4240    | 0.5583   | 0.3249    | 0.1048     | 0.0815     | 0.4587    | 0.4533     | 0.1837  | 0.3929    | 0.0908  | 0.2167   | 0.2565   |
| D2S1338 | Fst | -0.0006    | -0.0012   | -0.0012    | 0.0006    | 0.0015   | 0.0000    | -0.0003    | 0.0004     | 0.0007    | 0.0000     | -0.0020 | -0.0006   | -0.0019 | -0.0031  | -0.0033  |
|         | p   | 0.5769     | 0.6838    | 0.7285     | 0.3123    | 0.2060   | 0.4325    | 0.4859     | 0.3547     | 0.2793    | 0.4159     | 0.8091  | 0.5598    | 0.9427  | 0.8935   | 0.9143   |
| D3S1358 | Fst | 0.0062     | 0.0054    | 0.0099     | 0.0102    | 0.0058   | 0.0077    | 0.0076     | 0.0055     | 0.0049    | 0.0048     | 0.0059  | 0.0016    | 0.0017  | -0.0021  | -0.0026  |
|         | p   | 0.0279     | 0.0734    | 0.0116     | 0.0084    | 0.0689   | 0.0191    | 0.0183     | 0.0699     | 0.0565    | 0.0745     | 0.0680  | 0.2188    | 0.1891  | 0.6049   | 0.6468   |
| D5S818  | Fst | -0.0017    | -0.0020   | -0.0020    | -0.0019   | -0.0004  | -0.0015   | -0.0019    | -0.0017    | -0.0010   | -0.0017    | -0.0037 | -0.0024   | -0.0016 | -0.0050  | -0.0038  |
|         | p   | 0.7947     | 0.7563    | 0.8102     | 0.8105    | 0.4459   | 0.7090    | 0.8317     | 0.6911     | 0.5964    | 0.7063     | 0.9871  | 0.8695    | 0.7677  | 0.9985   | 0.8839   |
| D6S1043 | Fst | -0.0019    | -0.0028   | -0.0020    | -0.0018   | -0.0028  | 0.0000    | -0.0018    | -0.0025    | -0.0016   | -0.0027    | -0.0013 | -0.0016   | -0.0017 | -0.0019  | -0.0032  |
|         | p   | 0.9304     | 0.9786    | 0.9163     | 0.8870    | 0.9644   | 0.4183    | 0.9007     | 0.9342     | 0.8356    | 0.9844     | 0.6660  | 0.7994    | 0.8962  | 0.7268   | 0.9153   |
| D7S820  | Fst | 0.0069     | 0.0083    | 0.0086     | 0.0092    | 0.0036   | 0.0025    | 0.0084     | 0.0072     | 0.0085    | 0.0056     | 0.0028  | 0.0049    | 0.0072  | 0.0034   | 0.0012   |
|         | p   | 0.0105     | 0.0151    | 0.0077     | 0.0067    | 0.1046   | 0.1316    | 0.0062     | 0.0231     | 0.0066    | 0.0352     | 0.1439  | 0.0517    | 0.0096  | 0.1524   | 0.2951   |
| D8S1179 | Fst | 0.0065     | 0.0045    | 0.0080     | 0.0064    | 0.0089   | 0.0073    | 0.0072     | 0.0044     | 0.0080    | 0.0104     | 0.0028  | 0.0040    | 0.0013  | -0.0023  | -0.0042  |
|         | p   | 0.0037     | 0.0463    | 0.0025     | 0.0083    | 0.0043   | 0.0034    | 0.0031     | 0.0532     | 0.0013    | 0.0012     | 0.1215  | 0.0492    | 0.1974  | 0.7487   | 0.9760   |
| D12S391 | Fst | 0.0368     | 0.0363    | 0.0380     | 0.0393    | 0.0355   | 0.0407    | 0.0369     | 0.0388     | 0.0356    | 0.0375     | 0.0418  | 0.0388    | 0.0408  | 0.0398   | 0.0439   |
|         | p   | 0.0000     | 0.0000    | 0.0000     | 0.0000    | 0.0000   | 0.0000    | 0.0000     | 0.0000     | 0.0000    | 0.0000     | 0.0000  | 0.0000    | 0.0000  | 0.0000   | 0.0000   |
| D13S317 | Fst | 0.0013     | -0.0001   | 0.0015     | 0.0037    | 0.0002   | 0.0028    | 0.0010     | 0.0008     | 0.0013    | 0.0009     | -0.0015 | -0.0006   | -0.0005 | -0.0035  | -0.0041  |
|         | p   | 0.2002     | 0.4238    | 0.2065     | 0.0709    | 0.3650   | 0.1064    | 0.2551     | 0.2962     | 0.2217    | 0.2732     | 0.6221  | 0.4991    | 0.5041  | 0.8841   | 0.9496   |

|         |     |         |         |         |         |         |         |         |         |         |         |         |         |         |         |         |
|---------|-----|---------|---------|---------|---------|---------|---------|---------|---------|---------|---------|---------|---------|---------|---------|---------|
| D16S539 | Fst | 0.0004  | 0.0010  | 0.0013  | 0.0000  | -0.0003 | -0.0008 | -0.0004 | 0.0023  | 0.0005  | 0.0014  | 0.0038  | 0.0007  | 0.0015  | 0.0008  | 0.0049  |
|         | p   | 0.3302  | 0.2708  | 0.2287  | 0.3965  | 0.4468  | 0.5429  | 0.4646  | 0.1683  | 0.3086  | 0.2206  | 0.1083  | 0.2979  | 0.2001  | 0.3181  | 0.0995  |
| D18S51  | Fst | 0.0087  | 0.0081  | 0.0101  | 0.0105  | 0.0107  | 0.0078  | 0.0094  | 0.0115  | 0.0121  | 0.0124  | 0.0043  | 0.0050  | 0.0040  | -0.0013 | -0.0004 |
|         | p   | 0.0005  | 0.0050  | 0.0003  | 0.0007  | 0.0004  | 0.0015  | 0.0004  | 0.0008  | 0.0000  | 0.0001  | 0.0532  | 0.0221  | 0.0195  | 0.6117  | 0.4716  |
| D19S433 | Fst | -0.0019 | -0.0024 | -0.0021 | -0.0023 | -0.0025 | -0.0007 | -0.0014 | -0.0025 | -0.0016 | -0.0024 | -0.0009 | -0.0017 | -0.0016 | -0.0021 | -0.0036 |
|         | p   | 0.9076  | 0.9000  | 0.8961  | 0.9586  | 0.9124  | 0.5589  | 0.7681  | 0.9003  | 0.7967  | 0.9289  | 0.5565  | 0.7818  | 0.8471  | 0.7058  | 0.9285  |
| D21S11  | Fst | -0.0002 | 0.0002  | 0.0010  | -0.0001 | -0.0003 | -0.0009 | 0.0002  | -0.0005 | 0.0008  | 0.0000  | 0.0001  | -0.0019 | -0.0012 | -0.0007 | -0.0043 |
|         | p   | 0.4505  | 0.3703  | 0.2470  | 0.4223  | 0.4486  | 0.6175  | 0.3584  | 0.4865  | 0.2624  | 0.4017  | 0.3972  | 0.8473  | 0.7549  | 0.4979  | 0.9935  |
| FGA     | Fst | 0.0042  | 0.0034  | 0.0059  | 0.0025  | 0.0048  | 0.0037  | 0.0062  | 0.0042  | 0.0060  | 0.0020  | 0.0029  | 0.0008  | 0.0010  | -0.0015 | -0.0014 |
|         | p   | 0.0198  | 0.0691  | 0.0104  | 0.0819  | 0.0375  | 0.0380  | 0.0063  | 0.0451  | 0.0052  | 0.1410  | 0.1033  | 0.2873  | 0.2210  | 0.6369  | 0.6279  |
| PentaD  | Fst | 0.0025  | 0.0014  | 0.0038  | 0.0026  | 0.0042  | 0.0033  | 0.0022  | 0.0046  | 0.0029  | 0.0024  | 0.0005  | 0.0040  | 0.0015  | 0.0007  | 0.0004  |
|         | p   | 0.0897  | 0.2233  | 0.0588  | 0.0979  | 0.0665  | 0.0726  | 0.1223  | 0.0560  | 0.0865  | 0.1313  | 0.3402  | 0.0641  | 0.1683  | 0.3261  | 0.3612  |
| PentaE  | Fst | 0.0026  | 0.0020  | 0.0028  | 0.0024  | 0.0026  | 0.0029  | 0.0025  | 0.0043  | 0.0035  | 0.0015  | 0.0016  | 0.0012  | 0.0013  | 0.0011  | -0.0017 |
|         | p   | 0.0384  | 0.1156  | 0.0415  | 0.0579  | 0.0840  | 0.0392  | 0.0480  | 0.0220  | 0.0205  | 0.1567  | 0.1735  | 0.1867  | 0.1383  | 0.2768  | 0.7595  |
| TH01    | Fst | -0.0012 | -0.0024 | 0.0002  | -0.0005 | -0.0025 | 0.0001  | -0.0009 | -0.0016 | 0.0019  | -0.0016 | 0.0002  | -0.0012 | -0.0011 | -0.0015 | -0.0011 |
|         | p   | 0.6259  | 0.7916  | 0.3422  | 0.4541  | 0.7812  | 0.3627  | 0.5274  | 0.6157  | 0.1749  | 0.6585  | 0.3483  | 0.5778  | 0.5980  | 0.5149  | 0.4580  |
| TPOX    | Fst | 0.0004  | 0.0015  | 0.0012  | 0.0013  | 0.0001  | 0.0010  | 0.0000  | -0.0007 | 0.0010  | 0.0016  | -0.0031 | -0.0025 | -0.0004 | -0.0040 | -0.0044 |
|         | p   | 0.3013  | 0.2320  | 0.2474  | 0.2321  | 0.3381  | 0.2590  | 0.3542  | 0.4279  | 0.2506  | 0.2198  | 0.8171  | 0.7762  | 0.4094  | 0.8519  | 0.8935  |
| VWA     | Fst | 0.0093  | 0.0148  | 0.0080  | 0.0088  | 0.0114  | 0.0128  | 0.0110  | 0.0151  | 0.0137  | 0.0113  | 0.0009  | 0.0037  | 0.0051  | 0.0014  | 0.0031  |
|         | p   | 0.3013  | 0.2320  | 0.2474  | 0.2321  | 0.3381  | 0.2590  | 0.3542  | 0.4279  | 0.2506  | 0.2198  | 0.8171  | 0.7762  | 0.4094  | 0.8519  | 0.8935  |

Continue Table S9:

| Loci    |     | Shanghai- | Jiangsu-    | Jiangsu-     | Jiangsu-    | Anhui-     | Shangdong- | Shanxi- | Jiangxi-     | Yunnan- | Yungui- | Taiwan- | Xinjiang- | Xinjiang- | Xinjiang- | Xinjiang- |
|---------|-----|-----------|-------------|--------------|-------------|------------|------------|---------|--------------|---------|---------|---------|-----------|-----------|-----------|-----------|
|         |     | Han       | Huai'an-Han | Yangzhou-Han | Taizhou-Han | Suzhou-Han | Han        | Han     | Jiujiang-Han | Han     | Han     | Han     | Uyghur1   | Uyghur2   | Uyghur3   | Kazakh    |
| CSF1PO  | Fst | 0.0006    | -0.0023     | 0.0017       | -0.0012     | -0.0018    | 0.0010     | 0.0030  | 0.0009       | 0.0024  | 0.0021  | 0.0039  | 0.0147    | 0.0046    | 0.0072    | 0.0025    |
|         | p   | 0.3011    | 0.5904      | 0.2699       | 0.4596      | 0.5786     | 0.3025     | 0.1337  | 0.2551       | 0.1444  | 0.1484  | 0.0764  | 0.0009    | 0.1265    | 0.1226    | 0.2647    |
| D2S1338 | Fst | -0.0028   | -0.0030     | -0.0039      | -0.0041     | -0.0028    | -0.0046    | -0.0024 | -0.0017      | -0.0020 | -0.0021 | -0.0015 | -0.0003   | 0.0010    | -0.0019   | -0.0005   |
|         | p   | 0.9875    | 0.7952      | 0.9594       | 0.8885      | 0.8594     | 0.9961     | 0.9311  | 0.9009       | 0.9316  | 0.9513  | 0.8389  | 0.4873    | 0.3032    | 0.6270    | 0.4610    |
| D3S1358 | Fst | 0.0011    | -0.0051     | -0.0026      | 0.0011      | -0.0033    | -0.0035    | 0.0007  | 0.0015       | 0.0012  | 0.0041  | 0.0024  | 0.0071    | 0.0001    | 0.0109    | 0.0021    |
|         | p   | 0.2565    | 0.8926      | 0.6477       | 0.3025      | 0.7699     | 0.7970     | 0.3021  | 0.1995       | 0.2294  | 0.0722  | 0.1467  | 0.0214    | 0.3627    | 0.0625    | 0.2802    |
| D5S818  | Fst | -0.0025   | -0.0061     | -0.0035      | -0.0042     | -0.0043    | -0.0051    | -0.0023 | -0.0022      | -0.0022 | -0.0023 | -0.0023 | 0.0051    | 0.0068    | 0.0015    | -0.0050   |
|         | p   | 0.9003    | 0.9939      | 0.8272       | 0.7838      | 0.9526     | 0.9988     | 0.8249  | 0.9320       | 0.8971  | 0.9343  | 0.9219  | 0.0456    | 0.0616    | 0.3088    | 0.7827    |

|         |     |         |         |         |         |         |         |         |         |         |         |         |         |         |         |         |
|---------|-----|---------|---------|---------|---------|---------|---------|---------|---------|---------|---------|---------|---------|---------|---------|---------|
| D6S1043 | Fst | -0.0009 | -0.0042 | -0.0034 | 0.0007  | -0.0032 | -0.0018 | -0.0009 | -0.0012 | -0.0012 | -0.0016 | -0.0022 | 0.0072  | 0.0038  | 0.0001  | 0.0103  |
|         | p   | 0.6178  | 0.9449  | 0.9234  | 0.3640  | 0.9265  | 0.7182  | 0.6271  | 0.7574  | 0.7480  | 0.8669  | 0.9727  | 0.0034  | 0.0946  | 0.4119  | 0.0355  |
| D7S820  | Fst | 0.0003  | 0.0039  | -0.0028 | -0.0016 | 0.0069  | 0.0026  | 0.0015  | 0.0057  | 0.0039  | 0.0034  | 0.0081  | 0.0043  | 0.0007  | 0.0609  | 0.0023  |
|         | p   | 0.3532  | 0.1650  | 0.7557  | 0.5338  | 0.0532  | 0.1899  | 0.2253  | 0.0179  | 0.0577  | 0.0728  | 0.0072  | 0.0501  | 0.3322  | 0.0000  | 0.2676  |
| D8S1179 | Fst | -0.0011 | -0.0033 | -0.0021 | -0.0010 | -0.0033 | -0.0007 | -0.0025 | 0.0011  | -0.0002 | 0.0013  | 0.0030  | 0.0008  | -0.0024 | -0.0050 | -0.0047 |
|         | p   | 0.6382  | 0.7959  | 0.6929  | 0.5131  | 0.8947  | 0.4994  | 0.9217  | 0.2168  | 0.4611  | 0.2013  | 0.0649  | 0.2763  | 0.7626  | 0.9082  | 0.8195  |
| D12S391 | Fst | 0.0408  | 0.0419  | 0.0359  | 0.0328  | 0.0359  | 0.0453  | 0.0325  | 0.0396  | 0.0428  | 0.0432  | 0.0392  | 0.0423  | 0.0359  | 0.0233  | 0.0449  |
|         | p   | 0.0000  | 0.0000  | 0.0000  | 0.0000  | 0.0000  | 0.0000  | 0.0000  | 0.0000  | 0.0000  | 0.0000  | 0.0000  | 0.0000  | 0.0000  | 0.0003  | 0.0000  |
| D13S317 | Fst | -0.0006 | -0.0008 | -0.0005 | -0.0056 | -0.0026 | -0.0009 | -0.0024 | -0.0003 | -0.0012 | -0.0006 | -0.0007 | 0.0114  | 0.0217  | 0.0009  | -0.0021 |
|         | p   | 0.5031  | 0.4649  | 0.4688  | 0.9535  | 0.7406  | 0.5058  | 0.8709  | 0.4663  | 0.6742  | 0.5275  | 0.5594  | 0.0008  | 0.0001  | 0.3434  | 0.5656  |
| D16S539 | Fst | -0.0011 | -0.0011 | 0.0035  | -0.0046 | 0.0044  | 0.0052  | 0.0017  | 0.0009  | -0.0001 | 0.0021  | 0.0020  | -0.0018 | -0.0010 | -0.0039 | -0.0063 |
|         | p   | 0.5767  | 0.4920  | 0.1575  | 0.8479  | 0.1109  | 0.0890  | 0.2056  | 0.2532  | 0.4175  | 0.1399  | 0.1609  | 0.7766  | 0.5271  | 0.7637  | 0.9008  |
| D18S51  | Fst | 0.0036  | -0.0005 | -0.0008 | 0.0013  | -0.0010 | -0.0021 | 0.0038  | 0.0037  | 0.0044  | 0.0035  | 0.0119  | 0.0045  | 0.0043  | 0.0061  | 0.0017  |
|         | p   | 0.0545  | 0.4575  | 0.5174  | 0.2922  | 0.5700  | 0.7329  | 0.0570  | 0.0316  | 0.0193  | 0.0417  | 0.0001  | 0.0239  | 0.0757  | 0.0868  | 0.2888  |
| D19S433 | Fst | -0.0016 | -0.0025 | -0.0023 | -0.0050 | -0.0025 | -0.0029 | -0.0022 | -0.0016 | -0.0018 | -0.0018 | -0.0013 | 0.0050  | 0.0065  | 0.0009  | 0.0158  |
|         | p   | 0.7494  | 0.6965  | 0.7254  | 0.9367  | 0.7704  | 0.8465  | 0.8703  | 0.8476  | 0.8896  | 0.8934  | 0.7289  | 0.0268  | 0.0430  | 0.3350  | 0.0173  |
| D21S11  | Fst | -0.0016 | -0.0008 | -0.0009 | -0.0040 | -0.0005 | -0.0030 | -0.0017 | -0.0012 | -0.0010 | -0.0008 | -0.0002 | 0.0002  | 0.0004  | -0.0038 | -0.0025 |
|         | p   | 0.7658  | 0.4947  | 0.5091  | 0.8593  | 0.4693  | 0.8705  | 0.7710  | 0.7396  | 0.6438  | 0.5856  | 0.4490  | 0.3703  | 0.3576  | 0.8368  | 0.6377  |
| FGA     | Fst | 0.0000  | -0.0034 | -0.0024 | -0.0039 | 0.0018  | -0.0022 | -0.0005 | 0.0010  | 0.0007  | 0.0006  | 0.0029  | 0.0085  | 0.0029  | 0.0012  | -0.0046 |
|         | p   | 0.4126  | 0.8447  | 0.7800  | 0.8553  | 0.2118  | 0.7564  | 0.5038  | 0.2100  | 0.2780  | 0.2790  | 0.0631  | 0.0014  | 0.1400  | 0.3066  | 0.8378  |
| PentaD  | Fst | 0.0009  | 0.0025  | 0.0096  | 0.0011  | 0.0002  | -0.0013 | -0.0011 | 0.0011  | 0.0001  | 0.0001  | 0.0033  | 0.0034  | 0.0090  | -0.0033 | 0.0074  |
|         | p   | 0.2688  | 0.2217  | 0.0188  | 0.3229  | 0.3750  | 0.5646  | 0.6044  | 0.2168  | 0.3940  | 0.3786  | 0.0635  | 0.0657  | 0.0184  | 0.7269  | 0.0976  |
| PentaE  | Fst | 0.0011  | 0.0006  | -0.0027 | 0.0013  | -0.0003 | -0.0011 | 0.0000  | 0.0010  | 0.0009  | 0.0005  | 0.0018  | 0.0049  | 0.0078  | 0.0068  | 0.0039  |
|         | p   | 0.1975  | 0.3465  | 0.9009  | 0.2921  | 0.5022  | 0.6549  | 0.4377  | 0.1686  | 0.2052  | 0.2896  | 0.0970  | 0.0030  | 0.0030  | 0.0265  | 0.1373  |
| TH01    | Fst | -0.0012 | -0.0019 | -0.0012 | 0.0058  | -0.0040 | -0.0016 | -0.0017 | -0.0016 | -0.0014 | -0.0022 | 0.0001  | 0.0325  | 0.0459  | 0.0325  | 0.0441  |
|         | p   | 0.5464  | 0.5231  | 0.4609  | 0.1342  | 0.8926  | 0.5151  | 0.6343  | 0.7213  | 0.6364  | 0.8645  | 0.3600  | 0.0000  | 0.0000  | 0.0021  | 0.0006  |
| TPOX    | Fst | -0.0019 | -0.0015 | -0.0037 | -0.0046 | -0.0040 | -0.0043 | -0.0029 | -0.0017 | -0.0010 | -0.0020 | 0.0028  | 0.0007  | -0.0011 | -0.0029 | 0.0094  |
|         | p   | 0.6512  | 0.4662  | 0.7662  | 0.7540  | 0.8388  | 0.8847  | 0.8765  | 0.7064  | 0.5255  | 0.7386  | 0.1292  | 0.2829  | 0.4562  | 0.5653  | 0.1124  |
| VWA     | Fst | -0.0002 | -0.0019 | -0.0003 | 0.0068  | 0.0007  | -0.0010 | 0.0013  | 0.0045  | 0.0041  | 0.0056  | 0.0034  | 0.0010  | 0.0017  | 0.0015  | 0.0003  |
|         | p   | 0.6512  | 0.4662  | 0.7662  | 0.7540  | 0.8388  | 0.8847  | 0.8765  | 0.7064  | 0.5255  | 0.7386  | 0.1292  | 0.2829  | 0.4562  | 0.5653  | 0.1124  |



Continue Table S9:

| Loci    |     | HebeiChengde- | Liaoning- | Gansu-Hui | Yunnan-Bai | Yunnan-    | Yunnan- | Yunnan-Yi | Yunnan- | Yunnan- | Yunnan- | Yili-Xibe | Liangshan- | Hainan- |
|---------|-----|---------------|-----------|-----------|------------|------------|---------|-----------|---------|---------|---------|-----------|------------|---------|
|         |     | Manchu        | Hui       |           |            | Vietnamese | Miao    |           | Zhuang  | Dai     | Hani    |           | Tibatan    | Han     |
| CSF1PO  | Fst | 0.0014        | 0.0075    | 0.0039    | 0.0021     | 0.0062     | 0.0096  | 0.0013    | -0.0001 | -0.0053 | 0.0076  | -0.0012   | 0.0079     | 0.0087  |
|         | p   | 0.2398        | 0.0619    | 0.1449    | 0.1636     | 0.0534     | 0.0166  | 0.2446    | 0.3896  | 0.8892  | 0.0728  | 0.5069    | 0.0597     | 0.0478  |
| D2S1338 | Fst | -0.0031       | -0.0019   | -0.0033   | -0.0020    | 0.0065     | 0.0155  | -0.0011   | 0.0037  | 0.0004  | -0.0027 | -0.0039   | -0.0022    | 0.0009  |
|         | p   | 0.9844        | 0.7110    | 0.9427    | 0.9143     | 0.0125     | 0.0002  | 0.6777    | 0.0976  | 0.3851  | 0.8090  | 0.9858    | 0.7550     | 0.3108  |
| D3S1358 | Fst | -0.0017       | -0.0008   | 0.0072    | -0.0002    | 0.0254     | 0.0236  | 0.0007    | 0.0055  | 0.0083  | 0.0053  | -0.0044   | -0.0042    | 0.0083  |
|         | p   | 0.6154        | 0.4632    | 0.0628    | 0.4015     | 0.0004     | 0.0001  | 0.2922    | 0.1007  | 0.0986  | 0.1186  | 0.9455    | 0.8823     | 0.0594  |
| D5S818  | Fst | -0.0022       | -0.0044   | -0.0024   | -0.0003    | -0.0018    | 0.0008  | -0.0026   | -0.0019 | 0.0009  | -0.0037 | -0.0012   | -0.0038    | -0.0048 |
|         | p   | 0.7647        | 0.9777    | 0.7122    | 0.4323     | 0.7007     | 0.2782  | 0.8866    | 0.6518  | 0.3370  | 0.8540  | 0.5324    | 0.8928     | 0.9873  |
| D6S1043 | Fst | -0.0022       | -0.0029   | -0.0010   | -0.0016    | -0.0001    | 0.0022  | -0.0008   | -0.0012 | -0.0001 | 0.0009  | -0.0027   | -0.0040    | 0.0149  |
|         | p   | 0.8889        | 0.9056    | 0.5891    | 0.8502     | 0.4417     | 0.1099  | 0.5857    | 0.6268  | 0.4304  | 0.3233  | 0.8817    | 0.9861     | 0.0002  |
| D7S820  | Fst | 0.0038        | -0.0018   | -0.0006   | 0.0006     | 0.0400     | 0.0419  | 0.0033    | 0.0143  | 0.0213  | 0.0030  | -0.0009   | -0.0030    | 0.0050  |
|         | p   | 0.1021        | 0.6449    | 0.4722    | 0.3096     | 0.0000     | 0.0000  | 0.1059    | 0.0041  | 0.0049  | 0.1763  | 0.4926    | 0.7968     | 0.0895  |
| D8S1179 | Fst | -0.0004       | -0.0036   | 0.0009    | -0.0016    | 0.0328     | 0.0498  | 0.0066    | 0.0119  | 0.0130  | 0.0021  | 0.0007    | -0.0001    | 0.0004  |
|         | p   | 0.4766        | 0.9378    | 0.3058    | 0.7912     | 0.0000     | 0.0000  | 0.0122    | 0.0017  | 0.0113  | 0.2255  | 0.3240    | 0.4297     | 0.3719  |
| D12S391 | Fst | 0.0477        | 0.0376    | 0.0431    | 0.0463     | 0.0537     | 0.0695  | 0.0417    | 0.0305  | 0.0489  | 0.0468  | 0.2076    | 0.0391     | 0.0380  |
|         | p   | 0.0000        | 0.0000    | 0.0000    | 0.0000     | 0.0000     | 0.0000  | 0.0000    | 0.0000  | 0.0000  | 0.0000  | 0.0000    | 0.0000     | 0.0000  |
| D13S317 | Fst | -0.0024       | -0.0039   | -0.0028   | -0.0007    | 0.0362     | 0.0702  | -0.0010   | 0.0013  | 0.0034  | 0.0002  | -0.0040   | -0.0025    | -0.0021 |
|         | p   | 0.8461        | 0.9511    | 0.8106    | 0.5395     | 0.0000     | 0.0000  | 0.5801    | 0.2779  | 0.1928  | 0.3909  | 0.9555    | 0.7416     | 0.6892  |
| D16S539 | Fst | 0.0038        | -0.0003   | 0.0004    | 0.0003     | 0.0134     | 0.0779  | -0.0003   | -0.0003 | -0.0046 | -0.0006 | -0.0011   | 0.0188     | -0.0001 |
|         | p   | 0.0992        | 0.4213    | 0.3567    | 0.3513     | 0.0031     | 0.0000  | 0.4446    | 0.4269  | 0.8506  | 0.4570  | 0.5353    | 0.0024     | 0.4133  |
| D18S51  | Fst | -0.0008       | -0.0004   | 0.0074    | 0.0062     | 0.0077     | 0.0123  | 0.0093    | 0.0129  | 0.0088  | -0.0011 | -0.0015   | 0.0017     | 0.0046  |
|         | p   | 0.5498        | 0.4628    | 0.0186    | 0.0097     | 0.0069     | 0.0007  | 0.0040    | 0.0012  | 0.0353  | 0.5770  | 0.6537    | 0.2266     | 0.0717  |
| D19S433 | Fst | -0.0014       | -0.0046   | -0.0010   | -0.0011    | 0.0149     | 0.0229  | 0.0037    | -0.0020 | -0.0045 | -0.0015 | -0.0026   | -0.0016    | -0.0037 |
|         | p   | 0.6578        | 0.9996    | 0.5413    | 0.6765     | 0.0003     | 0.0000  | 0.0681    | 0.7387  | 0.9006  | 0.5916  | 0.8210    | 0.6414     | 0.9518  |
| D21S11  | Fst | -0.0002       | -0.0010   | -0.0029   | -0.0016    | 0.0035     | 0.0083  | -0.0012   | -0.0017 | -0.0045 | -0.0029 | -0.0021   | -0.0030    | -0.0031 |
|         | p   | 0.4284        | 0.5489    | 0.8880    | 0.8111     | 0.0797     | 0.0040  | 0.6637    | 0.7100  | 0.9311  | 0.8295  | 0.7280    | 0.8842     | 0.8852  |
| FGA     | Fst | -0.0004       | -0.0019   | 0.0005    | -0.0001    | 0.0233     | 0.0369  | 0.0110    | 0.0132  | 0.0142  | 0.0066  | -0.0020   | 0.0013     | 0.0048  |
|         | p   | 0.4872        | 0.7343    | 0.3421    | 0.4468     | 0.0000     | 0.0000  | 0.0001    | 0.0009  | 0.0065  | 0.0408  | 0.7444    | 0.2678     | 0.0657  |

|        |     |         |         |         |         |        |        |         |         |         |         |         |         |         |
|--------|-----|---------|---------|---------|---------|--------|--------|---------|---------|---------|---------|---------|---------|---------|
| PentaD | Fst | 0.0008  | 0.0012  | 0.0040  | -0.0002 | 0.0060 | 0.0057 | -0.0008 | 0.0063  | 0.0107  | 0.0002  | 0.0008  | 0.0069  | 0.0023  |
|        | p   | 0.2850  | 0.2703  | 0.1107  | 0.4533  | 0.0261 | 0.0277 | 0.5534  | 0.0457  | 0.0325  | 0.3758  | 0.3108  | 0.0480  | 0.1984  |
| PentaE | Fst | -0.0014 | -0.0019 | 0.0010  | 0.0009  | 0.0043 | 0.0841 | 0.0062  | 0.0109  | 0.0128  | 0.0074  | 0.0052  | -0.0017 | 0.0005  |
|        | p   | 0.7970  | 0.8219  | 0.2740  | 0.2355  | 0.0178 | 0.0000 | 0.0013  | 0.0019  | 0.0038  | 0.0146  | 0.0187  | 0.7645  | 0.3502  |
| TH01   | Fst | -0.0009 | -0.0037 | 0.0031  | 0.0000  | 0.0051 | 0.0128 | -0.0013 | 0.0017  | -0.0068 | -0.0040 | -0.0001 | -0.0022 | -0.0005 |
|        | p   | 0.4863  | 0.8712  | 0.1680  | 0.3586  | 0.0716 | 0.0055 | 0.5629  | 0.2313  | 0.9957  | 0.8544  | 0.3855  | 0.6262  | 0.4078  |
| TPOX   | Fst | -0.0037 | -0.0046 | -0.0025 | -0.0021 | 0.0453 | 0.0544 | 0.0006  | -0.0002 | 0.0019  | 0.0081  | -0.0043 | 0.0109  | -0.0035 |
|        | p   | 0.9686  | 0.9659  | 0.6226  | 0.7307  | 0.0000 | 0.0000 | 0.2952  | 0.3743  | 0.2624  | 0.0768  | 0.9275  | 0.0405  | 0.7406  |
| VWA    | Fst | -0.0011 | 0.0038  | 0.0014  | 0.0031  | 0.0269 | 0.0392 | 0.0091  | 0.0164  | 0.0060  | -0.0020 | 0.0014  | -0.0007 | 0.0113  |
|        | p   | 0.9686  | 0.9659  | 0.6226  | 0.7307  | 0.0000 | 0.0000 | 0.2952  | 0.3743  | 0.2624  | 0.0768  | 0.9275  | 0.0405  | 0.7406  |

---

**Supplementary Table S10.** The Fst and corresponding p value of locus-by-locus pairwise comparisons between the Sichuan Tibetan and other 58 relative reference populations.

| Loci    |     | Tibet-<br>Tibetan | Sichuan<br>- Han1 | Sichuan-<br>Han2 | Sichuan<br>- Han3 | Chongqing<br>-Han | GansuPingliang<br>-Han | InnerMongolia<br>-Han | Hunan-Han | Henan-<br>Han1 | Henan-<br>Han2 | Hubei-<br>Han1 | Hubei-<br>Han2 | Jiangxi-<br>Han | Guangxi-<br>Han | Guangdong-<br>Han |
|---------|-----|-------------------|-------------------|------------------|-------------------|-------------------|------------------------|-----------------------|-----------|----------------|----------------|----------------|----------------|-----------------|-----------------|-------------------|
| CSF1PO  | Fst | 0.0025            | 0.0011            | 0.0028           | -0.0002           | 0.0012            | -0.0024                | 0.0007                | 0.0052    | 0.0005         | -0.0013        | -0.0003        | 0.0003         | 0.0001          | 0.0019          | 0.0021            |
|         | p   | 0.2507            | 0.2501            | 0.0993           | 0.4030            | 0.2291            | 0.6861                 | 0.3071                | 0.0466    | 0.3151         | 0.5480         | 0.4244         | 0.3398         | 0.3633          | 0.1817          | 0.1549            |
| D2S1338 | Fst | -0.0012           | 0.0002            | -0.0001          | 0.0004            | -0.0003           | 0.0006                 | 0.0025                | -0.0004   | 0.0017         | -0.0016        | 0.0002         | 0.0011         | 0.0006          | 0.0033          | 0.0007            |
|         | p   | 0.5341            | 0.3689            | 0.4335           | 0.3428            | 0.4889            | 0.3327                 | 0.1098                | 0.5140    | 0.1555         | 0.7377         | 0.3820         | 0.1977         | 0.2986          | 0.0456          | 0.2649            |
| D3S1358 | Fst | 0.0142            | 0.0025            | 0.0050           | -0.0002           | 0.0030            | 0.0011                 | 0.0024                | 0.0015    | 0.0022         | 0.0008         | 0.0027         | 0.0032         | 0.0051          | 0.0129          | 0.0026            |
|         | p   | 0.0366            | 0.1517            | 0.0409           | 0.3938            | 0.1310            | 0.2845                 | 0.1617                | 0.2162    | 0.1756         | 0.2980         | 0.1486         | 0.0833         | 0.0629          | 0.0028          | 0.1317            |
| D5S818  | Fst | -0.0017           | -0.0023           | -0.0006          | -0.0033           | -0.0012           | -0.0019                | 0.1241                | -0.0018   | -0.0020        | -0.0012        | -0.0006        | -0.0018        | -0.0023         | 0.0005          | -0.0011           |
|         | p   | 0.5336            | 0.8860            | 0.5417           | 0.9494            | 0.6521            | 0.6625                 | 0.0000                | 0.7814    | 0.8037         | 0.5695         | 0.5008         | 0.8610         | 0.8808          | 0.3248          | 0.6447            |
| D6S1043 | Fst | 0.0012            | 0.0013            | -0.0005          | -0.0006           | 0.0009            | 0.0008                 | -0.0008               | -0.0004   | 0.0215         | -0.0003        | -0.0005        | -0.0001        | 0.0001          | -0.0004         | -0.0006           |
|         | p   | 0.3128            | 0.1913            | 0.5743           | 0.5315            | 0.2553            | 0.3093                 | 0.5962                | 0.5170    | 0.0000         | 0.4707         | 0.5463         | 0.4592         | 0.4022          | 0.5214          | 0.6080            |
| D7S820  | Fst | -0.0020           | 0.0072            | 0.0090           | 0.0037            | 0.0123            | 0.0065                 | 0.0064                | 0.0088    | 0.0030         | 0.0022         | 0.0045         | 0.0085         | 0.0125          | 0.0209          | 0.0051            |
|         | p   | 0.5733            | 0.0144            | 0.0022           | 0.0991            | 0.0011            | 0.0514                 | 0.0254                | 0.0059    | 0.1059         | 0.1886         | 0.0550         | 0.0032         | 0.0016          | 0.0001          | 0.0277            |
| D8S1179 | Fst | 0.0039            | 0.0109            | 0.0088           | 0.0050            | 0.0092            | -0.0004                | 0.0060                | 0.0107    | 0.0026         | 0.0011         | 0.0058         | 0.0072         | 0.0124          | 0.0222          | 0.0087            |
|         | p   | 0.1740            | 0.0003            | 0.0002           | 0.0479            | 0.0017            | 0.4528                 | 0.0188                | 0.0003    | 0.1092         | 0.2754         | 0.0173         | 0.0019         | 0.0002          | 0.0000          | 0.0004            |
| D12S391 | Fst | -0.0060           | 0.0010            | 0.0009           | -0.0018           | 0.0002            | -0.0017                | -0.0010               | 0.0008    | -0.0018        | -0.0019        | -0.0015        | 0.0018         | 0.0019          | 0.0068          | 0.0009            |
|         | p   | 0.9875            | 0.2435            | 0.2367           | 0.7703            | 0.3592            | 0.6912                 | 0.6244                | 0.2650    | 0.8172         | 0.7456         | 0.7419         | 0.1311         | 0.1506          | 0.0052          | 0.2433            |
| D13S317 | Fst | -0.0036           | 0.0040            | 0.0035           | -0.0001           | 0.0026            | 0.0015                 | -0.0011               | 0.0025    | 0.0001         | -0.0030        | 0.0005         | 0.0018         | 0.0021          | 0.0050          | 0.0008            |
|         | p   | 0.7553            | 0.0592            | 0.0534           | 0.4159            | 0.1171            | 0.2461                 | 0.6050                | 0.1206    | 0.3782         | 0.9057         | 0.3183         | 0.1377         | 0.1567          | 0.0349          | 0.2592            |
| D16S539 | Fst | -0.0012           | 0.0176            | 0.0165           | 0.0327            | 0.0203            | 0.0149                 | 0.1350                | 0.0174    | 0.0218         | 0.0150         | 0.0211         | 0.0192         | 0.0197          | 0.0089          | 0.0173            |
|         | p   | 0.4999            | 0.0001            | 0.0000           | 0.0000            | 0.0000            | 0.0046                 | 0.0000                | 0.0001    | 0.0000         | 0.0022         | 0.0000         | 0.0000         | 0.0000          | 0.0067          | 0.0000            |
| D18S51  | Fst | 0.0015            | 0.0139            | 0.0101           | 0.0100            | 0.0115            | 0.0105                 | 0.0063                | 0.0132    | 0.0072         | 0.0055         | 0.0064         | 0.0100         | 0.0085          | 0.0241          | 0.0082            |
|         | p   | 0.2713            | 0.0001            | 0.0001           | 0.0045            | 0.0006            | 0.0058                 | 0.0142                | 0.0000    | 0.0061         | 0.0381         | 0.0097         | 0.0001         | 0.0021          | 0.0000          | 0.0006            |
| D19S433 | Fst | -0.0054           | 0.0013            | 0.0017           | -0.0004           | -0.0016           | -0.0017                | -0.0007               | 0.0009    | 0.0005         | 0.0022         | 0.0010         | 0.0020         | 0.0030          | 0.0012          | 0.0019            |
|         | p   | 0.9672            | 0.2055            | 0.1353           | 0.4816            | 0.8073            | 0.7028                 | 0.5181                | 0.2581    | 0.3283         | 0.1645         | 0.2512         | 0.1134         | 0.0907          | 0.2180          | 0.1275            |
| D21S11  | Fst | -0.0031           | 0.0003            | 0.0005           | -0.0011           | 0.0006            | -0.0007                | 0.0014                | 0.0003    | 0.0000         | -0.0010        | 0.0006         | 0.0004         | 0.0002          | 0.0012          | 0.0002            |
|         | p   | 0.7551            | 0.3319            | 0.2997           | 0.6189            | 0.3038            | 0.5100                 | 0.2056                | 0.3534    | 0.3937         | 0.5706         | 0.2939         | 0.3158         | 0.3673          | 0.2182          | 0.3432            |
| FGA     | Fst | -0.0018           | 0.0017            | 0.0008           | 0.0003            | -0.0007           | -0.0001                | 0.0075                | 0.0004    | -0.0014        | 0.0002         | -0.0005        | 0.0002         | -0.0006         | 0.0013          | 0.0002            |
|         | p   | 0.6331            | 0.1484            | 0.2342           | 0.3659            | 0.5984            | 0.4228                 | 0.0049                | 0.3269    | 0.7593         | 0.3747         | 0.5250         | 0.3714         | 0.5569          | 0.1824          | 0.3693            |

|        |     |         |         |         |         |         |         |         |        |         |         |         |         |         |        |         |
|--------|-----|---------|---------|---------|---------|---------|---------|---------|--------|---------|---------|---------|---------|---------|--------|---------|
| PentaD | Fst | -0.0042 | 0.0087  | 0.0087  | 0.0082  | 0.0067  | 0.0014  | 0.0092  | 0.0073 | 0.0077  | 0.0081  | 0.0085  | 0.0100  | 0.0093  | 0.0167 | 0.0081  |
|        | p   | 0.8317  | 0.0046  | 0.0015  | 0.0140  | 0.0110  | 0.2510  | 0.0045  | 0.0071 | 0.0074  | 0.0177  | 0.0054  | 0.0008  | 0.0046  | 0.0001 | 0.0049  |
| PentaE | Fst | -0.0057 | -0.0002 | 0.0007  | -0.0024 | -0.0001 | 0.0022  | 0.0151  | 0.0006 | -0.0014 | -0.0016 | -0.0004 | -0.0003 | -0.0001 | 0.0062 | -0.0003 |
|        | p   | 0.9992  | 0.4838  | 0.2301  | 0.9639  | 0.4579  | 0.1354  | 0.0000  | 0.2622 | 0.8742  | 0.8305  | 0.5566  | 0.5273  | 0.4514  | 0.0013 | 0.5308  |
| TH01   | Fst | -0.0029 | -0.0019 | -0.0011 | -0.0014 | -0.0013 | -0.0013 | -0.0013 | 0.0015 | -0.0010 | -0.0027 | -0.0014 | -0.0005 | -0.0004 | 0.0061 | 0.0004  |
|        | p   | 0.6037  | 0.7450  | 0.6072  | 0.5629  | 0.5915  | 0.5045  | 0.5661  | 0.1959 | 0.5429  | 0.7720  | 0.6031  | 0.4626  | 0.4204  | 0.0358 | 0.3132  |
| TPOX   | Fst | 0.0207  | 0.0117  | 0.0100  | 0.0061  | 0.0113  | 0.0159  | 0.0118  | 0.0105 | 0.0146  | 0.0200  | 0.0117  | 0.0077  | 0.0064  | 0.0131 | 0.0087  |
|        | p   | 0.0203  | 0.0101  | 0.0099  | 0.0748  | 0.0118  | 0.0121  | 0.0148  | 0.0114 | 0.0050  | 0.0032  | 0.0119  | 0.0202  | 0.0485  | 0.0077 | 0.0181  |
| VWA    | Fst | -0.0042 | 0.0029  | 0.0021  | -0.0021 | 0.0014  | -0.0035 | 0.0009  | 0.0027 | 0.0015  | -0.0007 | 0.0004  | 0.0015  | 0.0005  | 0.0067 | 0.0011  |
|        | p   | 0.8029  | 0.0983  | 0.1278  | 0.7588  | 0.2125  | 0.9190  | 0.2796  | 0.1199 | 0.2068  | 0.5117  | 0.3366  | 0.1747  | 0.3213  | 0.0147 | 0.2268  |

Continue Table S10:

| Loci    |     | Guangzhou-Han | Dongguan-Han | Foshan-Han | Jiangmen-Han | Maoming-Han | Qingyuan-Han | Yangjiang-Han | Zhanjiang-Han | Zhaoqing-Han | Zhongshan-Han | Minnan-Han | Minxi-Han | Xiamen-Han | Beijing-Han | Tianjin-Han |
|---------|-----|---------------|--------------|------------|--------------|-------------|--------------|---------------|---------------|--------------|---------------|------------|-----------|------------|-------------|-------------|
| CSF1PO  | Fst | 0.0005        | -0.0015      | 0.0021     | 0.0012       | 0.0004      | 0.0009       | -0.0012       | -0.0007       | 0.0020       | 0.0013        | -0.0015    | 0.0008    | -0.0001    | 0.0036      | -0.0029     |
|         | p   | 0.2953        | 0.6281       | 0.1593     | 0.2265       | 0.3408      | 0.2571       | 0.6389        | 0.4816        | 0.1485       | 0.2299        | 0.6057     | 0.2797    | 0.3998     | 0.1577      | 0.7615      |
| D2S1338 | Fst | 0.0026        | -0.0003      | 0.0030     | 0.0034       | 0.0042      | 0.0033       | 0.0032        | 0.0027        | 0.0023       | 0.0045        | -0.0025    | 0.0022    | 0.0003     | -0.0020     | -0.0012     |
|         | p   | 0.0537        | 0.4727       | 0.0534     | 0.0367       | 0.0404      | 0.0393       | 0.0412        | 0.0984        | 0.0839       | 0.0242        | 0.9228     | 0.1077    | 0.3408     | 0.7484      | 0.6097      |
| D3S1358 | Fst | 0.0073        | 0.0080       | 0.0091     | 0.0119       | 0.0075      | 0.0095       | 0.0086        | 0.0087        | 0.0060       | 0.0070        | 0.0107     | 0.0039    | 0.0042     | -0.0006     | 0.0007      |
|         | p   | 0.0107        | 0.0275       | 0.0089     | 0.0025       | 0.0318      | 0.0061       | 0.0090        | 0.0206        | 0.0321       | 0.0283        | 0.0140     | 0.0885    | 0.0547     | 0.4306      | 0.3169      |
| D5S818  | Fst | 0.0003        | 0.0003       | -0.0003    | 0.0007       | 0.0012      | 0.0006       | -0.0004       | 0.0011        | 0.0014       | -0.0004       | -0.0014    | -0.0005   | -0.0006    | -0.0040     | -0.0030     |
|         | p   | 0.3354        | 0.3464       | 0.4431     | 0.2713       | 0.2573      | 0.2934       | 0.4804        | 0.2607        | 0.1979       | 0.4624        | 0.6407     | 0.4812    | 0.5519     | 0.9444      | 0.8098      |
| D6S1043 | Fst | -0.0003       | -0.0016      | -0.0005    | 0.0001       | -0.0014     | 0.0019       | 0.0003        | -0.0001       | 0.0002       | -0.0013       | 0.0012     | -0.0001   | 0.0000     | -0.0007     | -0.0014     |
|         | p   | 0.5094        | 0.8069       | 0.5526     | 0.4149       | 0.7557      | 0.1088       | 0.3633        | 0.4462        | 0.3762       | 0.7676        | 0.2425     | 0.4379    | 0.4282     | 0.5353      | 0.6602      |
| D7S820  | Fst | 0.0115        | 0.0128       | 0.0127     | 0.0139       | 0.0078      | 0.0060       | 0.0139        | 0.0118        | 0.0132       | 0.0092        | 0.0066     | 0.0099    | 0.0118     | 0.0066      | 0.0052      |
|         | p   | 0.0006        | 0.0016       | 0.0011     | 0.0001       | 0.0159      | 0.0155       | 0.0001        | 0.0031        | 0.0005       | 0.0054        | 0.0323     | 0.0040    | 0.0004     | 0.0560      | 0.0848      |
| D8S1179 | Fst | 0.0165        | 0.0154       | 0.0182     | 0.0156       | 0.0157      | 0.0165       | 0.0173        | 0.0102        | 0.0187       | 0.0230        | 0.0087     | 0.0146    | 0.0092     | -0.0012     | 0.0039      |
|         | p   | 0.0000        | 0.0001       | 0.0000     | 0.0000       | 0.0000      | 0.0000       | 0.0000        | 0.0007        | 0.0000       | 0.0000        | 0.0056     | 0.0000    | 0.0002     | 0.5771      | 0.1099      |
| D12S391 | Fst | 0.0021        | 0.0004       | 0.0029     | 0.0030       | 0.0007      | 0.0038       | 0.0030        | 0.0027        | 0.0038       | 0.0021        | 0.0040     | 0.0008    | 0.0008     | -0.0020     | -0.0037     |
|         | p   | 0.0911        | 0.3396       | 0.0720     | 0.0611       | 0.2964      | 0.0337       | 0.0539        | 0.1031        | 0.0333       | 0.1285        | 0.0608     | 0.2764    | 0.2511     | 0.7230      | 0.9569      |
| D13S317 | Fst | 0.0058        | 0.0030       | 0.0060     | 0.0078       | 0.0066      | 0.0081       | 0.0066        | 0.0066        | 0.0058       | 0.0060        | 0.0006     | 0.0019    | 0.0026     | -0.0025     | -0.0018     |
|         | p   | 0.0129        | 0.1021       | 0.0176     | 0.0051       | 0.0209      | 0.0040       | 0.0094        | 0.0203        | 0.0176       | 0.0225        | 0.3308     | 0.1684    | 0.0857     | 0.7548      | 0.6509      |

|         |     |        |         |        |        |         |         |        |        |        |        |         |         |        |         |         |
|---------|-----|--------|---------|--------|--------|---------|---------|--------|--------|--------|--------|---------|---------|--------|---------|---------|
| D16S539 | Fst | 0.0103 | 0.0090  | 0.0084 | 0.0094 | 0.0183  | 0.0141  | 0.0132 | 0.0054 | 0.0105 | 0.0087 | 0.0169  | 0.0158  | 0.0176 | 0.0146  | 0.0324  |
|         | p   | 0.0010 | 0.0094  | 0.0056 | 0.0029 | 0.0002  | 0.0003  | 0.0003 | 0.0459 | 0.0018 | 0.0071 | 0.0010  | 0.0005  | 0.0000 | 0.0057  | 0.0000  |
| D18S51  | Fst | 0.0139 | 0.0131  | 0.0180 | 0.0152 | 0.0188  | 0.0129  | 0.0163 | 0.0185 | 0.0186 | 0.0166 | 0.0114  | 0.0105  | 0.0088 | -0.0004 | 0.0056  |
|         | p   | 0.0000 | 0.0005  | 0.0000 | 0.0000 | 0.0000  | 0.0001  | 0.0000 | 0.0000 | 0.0000 | 0.0000 | 0.0018  | 0.0003  | 0.0001 | 0.4597  | 0.0510  |
| D19S433 | Fst | 0.0023 | 0.0020  | 0.0032 | 0.0015 | 0.0002  | 0.0028  | 0.0029 | 0.0004 | 0.0005 | 0.0028 | 0.0068  | 0.0010  | 0.0021 | 0.0028  | -0.0014 |
|         | p   | 0.0928 | 0.1576  | 0.0622 | 0.1738 | 0.3739  | 0.0727  | 0.0723 | 0.3401 | 0.2923 | 0.0926 | 0.0194  | 0.2436  | 0.0969 | 0.1549  | 0.6341  |
| D21S11  | Fst | 0.0010 | 0.0011  | 0.0035 | 0.0013 | -0.0004 | -0.0008 | 0.0022 | 0.0006 | 0.0018 | 0.0017 | 0.0003  | -0.0011 | 0.0002 | -0.0008 | -0.0032 |
|         | p   | 0.2080 | 0.2323  | 0.0512 | 0.1892 | 0.4650  | 0.5982  | 0.1102 | 0.3025 | 0.1427 | 0.1563 | 0.3555  | 0.6538  | 0.3570 | 0.5125  | 0.9179  |
| FGA     | Fst | 0.0036 | -0.0001 | 0.0038 | 0.0023 | 0.0033  | 0.0027  | 0.0040 | 0.0022 | 0.0028 | 0.0025 | -0.0008 | 0.0001  | 0.0007 | -0.0026 | -0.0011 |
|         | p   | 0.0211 | 0.4297  | 0.0315 | 0.0728 | 0.0648  | 0.0657  | 0.0206 | 0.1286 | 0.0571 | 0.0902 | 0.5948  | 0.3998  | 0.2375 | 0.8688  | 0.5963  |
| PentaD  | Fst | 0.0158 | 0.0133  | 0.0150 | 0.0131 | 0.0165  | 0.0178  | 0.0133 | 0.0217 | 0.0146 | 0.0160 | 0.0087  | 0.0142  | 0.0117 | 0.0048  | 0.0028  |
|         | p   | 0.0001 | 0.0007  | 0.0001 | 0.0003 | 0.0003  | 0.0000  | 0.0003 | 0.0000 | 0.0003 | 0.0001 | 0.0092  | 0.0003  | 0.0006 | 0.0780  | 0.1706  |
| PentaE  | Fst | 0.0027 | 0.0029  | 0.0041 | 0.0022 | 0.0036  | 0.0025  | 0.0031 | 0.0057 | 0.0039 | 0.0025 | 0.0008  | 0.0008  | 0.0006 | -0.0012 | -0.0025 |
|         | p   | 0.0258 | 0.0431  | 0.0064 | 0.0543 | 0.0253  | 0.0418  | 0.0200 | 0.0043 | 0.0098 | 0.0509 | 0.2796  | 0.2483  | 0.2529 | 0.6909  | 0.9205  |
| TH01    | Fst | 0.0034 | 0.0029  | 0.0067 | 0.0043 | 0.0025  | 0.0055  | 0.0047 | 0.0015 | 0.0079 | 0.0018 | 0.0058  | 0.0025  | 0.0000 | -0.0035 | -0.0034 |
|         | p   | 0.0710 | 0.1343  | 0.0253 | 0.0649 | 0.1597  | 0.0362  | 0.0472 | 0.2201 | 0.0135 | 0.1792 | 0.0589  | 0.1485  | 0.3683 | 0.8631  | 0.8256  |
| TPOX    | Fst | 0.0081 | 0.0063  | 0.0056 | 0.0060 | 0.0095  | 0.0056  | 0.0083 | 0.0121 | 0.0088 | 0.0046 | 0.0119  | 0.0128  | 0.0073 | 0.0055  | 0.0077  |
|         | p   | 0.0155 | 0.0604  | 0.0528 | 0.0433 | 0.0272  | 0.0452  | 0.0199 | 0.0142 | 0.0176 | 0.0812 | 0.0152  | 0.0077  | 0.0245 | 0.1112  | 0.0781  |
| VWA     | Fst | 0.0039 | 0.0067  | 0.0031 | 0.0034 | 0.0034  | 0.0060  | 0.0045 | 0.0072 | 0.0060 | 0.0060 | -0.0013 | -0.0001 | 0.0011 | -0.0038 | -0.0007 |
|         | p   | 0.0398 | 0.0198  | 0.0860 | 0.0671 | 0.1022  | 0.0204  | 0.0342 | 0.0174 | 0.0162 | 0.0243 | 0.6135  | 0.4201  | 0.2247 | 0.9315  | 0.4889  |

Continue Table S10:

|         |     | Shanghai | Jiangsu-    | Jiangsu-     | Jiangsu-    | Anhui-     | Shandong- | Shanxi- | Jiangxi-     | Yunnan- | Yungui- | Taiwan- | Xinjiang- | Xinjiang- | Xinjiang- | Xinjiang- |
|---------|-----|----------|-------------|--------------|-------------|------------|-----------|---------|--------------|---------|---------|---------|-----------|-----------|-----------|-----------|
| Loci    |     | -Han     | Huai'an-Han | Yangzhou-Han | Taizhou-Han | Suzhou-Han | Han       | Han     | Jiujiang-Han | Han     | Han     | Han     | Uyghur1   | Uyghur2   | Uyghur3   | Kazakh    |
| CSF1PO  | Fst | 0.0017   | 0.0070      | -0.0037      | 0.0019      | -0.0005    | -0.0017   | -0.0017 | 0.0009       | -0.0006 | 0.0003  | -0.0009 | -0.0013   | -0.0044   | -0.0031   | -0.0076   |
|         | p   | 0.1893   | 0.0921      | 0.8390       | 0.2677      | 0.4314     | 0.5760    | 0.6994  | 0.2406       | 0.5033  | 0.3274  | 0.5651  | 0.6420    | 0.9805    | 0.6231    | 0.9729    |
| D2S1338 | Fst | 0.0001   | -0.0029     | -0.0024      | -0.0022     | 0.0012     | -0.0004   | -0.0002 | 0.0015       | 0.0005  | 0.0003  | -0.0001 | 0.0051    | 0.0077    | 0.0046    | 0.0067    |
|         | p   | 0.3828   | 0.7977      | 0.8006       | 0.6659      | 0.2786     | 0.4774    | 0.4432  | 0.1414       | 0.2852  | 0.3274  | 0.4406  | 0.0082    | 0.0158    | 0.1229    | 0.0847    |
| D3S1358 | Fst | 0.0039   | -0.0037     | 0.0017       | 0.0053      | -0.0012    | -0.0015   | 0.0032  | 0.0038       | 0.0035  | 0.0061  | 0.0036  | 0.0081    | -0.0007   | 0.0118    | 0.0002    |
|         | p   | 0.0865   | 0.7433      | 0.2565       | 0.1491      | 0.5017     | 0.5244    | 0.1185  | 0.0630       | 0.0754  | 0.0251  | 0.0723  | 0.0099    | 0.4484    | 0.0488    | 0.3545    |
| D5S818  | Fst | -0.0020  | -0.0041     | -0.0029      | -0.0050     | -0.0043    | -0.0038   | -0.0005 | -0.0011      | -0.0012 | -0.0010 | -0.0008 | 0.0014    | 0.0017    | -0.0017   | -0.0048   |
|         | p   | 0.8364   | 0.8566      | 0.7761       | 0.8948      | 0.9714     | 0.9300    | 0.4707  | 0.6619       | 0.7028  | 0.6411  | 0.5708  | 0.2000    | 0.2405    | 0.5269    | 0.7839    |

|         |     |         |         |         |         |         |         |         |         |         |         |         |        |         |         |         |
|---------|-----|---------|---------|---------|---------|---------|---------|---------|---------|---------|---------|---------|--------|---------|---------|---------|
| D6S1043 | Fst | 0.0010  | -0.0027 | -0.0011 | 0.0028  | -0.0027 | 0.0013  | 0.0008  | 0.0005  | 0.0000  | -0.0002 | -0.0008 | 0.0106 | 0.0083  | 0.0033  | 0.0149  |
|         | p   | 0.2289  | 0.7938  | 0.5953  | 0.1927  | 0.8801  | 0.2536  | 0.2755  | 0.3012  | 0.4246  | 0.4722  | 0.6838  | 0.0003 | 0.0084  | 0.1690  | 0.0076  |
| D7S820  | Fst | 0.0034  | 0.0079  | 0.0005  | -0.0002 | 0.0119  | 0.0073  | 0.0041  | 0.0102  | 0.0079  | 0.0070  | 0.0119  | 0.0048 | -0.0007 | 0.0664  | -0.0008 |
|         | p   | 0.0803  | 0.0594  | 0.3533  | 0.4132  | 0.0097  | 0.0438  | 0.0610  | 0.0013  | 0.0064  | 0.0087  | 0.0008  | 0.0322 | 0.4855  | 0.0000  | 0.4607  |
| D8S1179 | Fst | 0.0037  | 0.0075  | 0.0061  | 0.0048  | 0.0016  | 0.0045  | -0.0003 | 0.0093  | 0.0058  | 0.0091  | 0.0115  | 0.0051 | 0.0039  | 0.0015  | -0.0018 |
|         | p   | 0.0519  | 0.0459  | 0.0500  | 0.1278  | 0.2442  | 0.0847  | 0.4513  | 0.0001  | 0.0060  | 0.0003  | 0.0000  | 0.0165 | 0.1100  | 0.3021  | 0.5505  |
| D12S391 | Fst | -0.0002 | -0.0041 | -0.0027 | -0.0033 | -0.0028 | -0.0021 | 0.0012  | 0.0007  | 0.0003  | -0.0007 | 0.0005  | 0.0024 | 0.0015  | 0.0009  | 0.0112  |
|         | p   | 0.4537  | 0.9243  | 0.8211  | 0.7916  | 0.8572  | 0.7302  | 0.2204  | 0.2533  | 0.3346  | 0.6117  | 0.2973  | 0.0847 | 0.2488  | 0.3384  | 0.0385  |
| D13S317 | Fst | 0.0025  | -0.0014 | 0.0018  | -0.0034 | -0.0019 | 0.0043  | 0.0008  | 0.0025  | 0.0015  | 0.0017  | 0.0013  | 0.0057 | 0.0104  | -0.0035 | -0.0038 |
|         | p   | 0.1219  | 0.5450  | 0.2376  | 0.7645  | 0.6588  | 0.0980  | 0.2914  | 0.0888  | 0.1751  | 0.1590  | 0.2026  | 0.0154 | 0.0125  | 0.7388  | 0.7120  |
| D16S539 | Fst | 0.0232  | 0.0266  | 0.0307  | 0.0090  | 0.0312  | 0.0188  | 0.0157  | 0.0199  | 0.0193  | 0.0221  | 0.0215  | 0.0190 | 0.0075  | 0.0078  | 0.0103  |
|         | p   | 0.0001  | 0.0002  | 0.0000  | 0.0605  | 0.0000  | 0.0014  | 0.0001  | 0.0000  | 0.0000  | 0.0000  | 0.0000  | 0.0000 | 0.0406  | 0.0808  | 0.0698  |
| D18S51  | Fst | 0.0094  | 0.0015  | 0.0033  | 0.0061  | 0.0016  | 0.0000  | 0.0062  | 0.0083  | 0.0088  | 0.0089  | 0.0166  | 0.0132 | 0.0183  | 0.0180  | 0.0091  |
|         | p   | 0.0016  | 0.2763  | 0.1218  | 0.0724  | 0.2283  | 0.3979  | 0.0118  | 0.0006  | 0.0004  | 0.0007  | 0.0000  | 0.0000 | 0.0000  | 0.0030  | 0.0659  |
| D19S433 | Fst | 0.0014  | 0.0001  | -0.0004 | -0.0020 | 0.0023  | 0.0029  | 0.0003  | 0.0017  | 0.0022  | 0.0016  | 0.0019  | 0.0042 | 0.0064  | -0.0019 | 0.0087  |
|         | p   | 0.1983  | 0.3919  | 0.4581  | 0.6281  | 0.1810  | 0.1419  | 0.3377  | 0.1262  | 0.1040  | 0.1488  | 0.1147  | 0.0258 | 0.0396  | 0.6094  | 0.0617  |
| D21S11  | Fst | 0.0001  | -0.0010 | 0.0000  | -0.0042 | 0.0019  | -0.0016 | -0.0018 | 0.0003  | 0.0006  | 0.0001  | 0.0014  | 0.0005 | 0.0014  | -0.0023 | -0.0031 |
|         | p   | 0.3748  | 0.5159  | 0.3973  | 0.8916  | 0.2067  | 0.6549  | 0.8247  | 0.3396  | 0.2695  | 0.3743  | 0.1670  | 0.2969 | 0.2552  | 0.6568  | 0.7007  |
| FGA     | Fst | -0.0002 | -0.0017 | 0.0003  | -0.0019 | -0.0036 | 0.0035  | -0.0016 | 0.0004  | -0.0003 | 0.0000  | 0.0016  | 0.0028 | 0.0034  | -0.0025 | -0.0005 |
|         | p   | 0.4635  | 0.6435  | 0.3810  | 0.6374  | 0.9855  | 0.1045  | 0.8254  | 0.3216  | 0.5056  | 0.4136  | 0.1302  | 0.0610 | 0.1079  | 0.7080  | 0.4603  |
| PentaD  | Fst | 0.0116  | 0.0040  | 0.0116  | 0.0097  | 0.0086  | 0.0044  | 0.0064  | 0.0114  | 0.0097  | 0.0085  | 0.0148  | 0.0029 | 0.0040  | 0.0060  | 0.0033  |
|         | p   | 0.0007  | 0.1422  | 0.0084  | 0.0378  | 0.0192  | 0.0907  | 0.0156  | 0.0003  | 0.0002  | 0.0013  | 0.0001  | 0.0734 | 0.1051  | 0.1018  | 0.2220  |
| PentaE  | Fst | -0.0011 | -0.0013 | -0.0032 | -0.0028 | -0.0021 | -0.0007 | -0.0017 | 0.0000  | -0.0002 | 0.0004  | 0.0009  | 0.0040 | 0.0041  | 0.0010  | 0.0027  |
|         | p   | 0.7892  | 0.6538  | 0.9692  | 0.8466  | 0.8661  | 0.5835  | 0.9146  | 0.4523  | 0.4830  | 0.3272  | 0.1850  | 0.0058 | 0.0314  | 0.3062  | 0.1901  |
| TH01    | Fst | -0.0017 | -0.0020 | -0.0024 | 0.0000  | -0.0026 | -0.0013 | -0.0023 | -0.0006 | -0.0011 | -0.0011 | 0.0037  | 0.0373 | 0.0490  | 0.0354  | 0.0434  |
|         | p   | 0.6986  | 0.5521  | 0.6395  | 0.3630  | 0.7002  | 0.4979  | 0.8214  | 0.4983  | 0.6194  | 0.6025  | 0.0672  | 0.0000 | 0.0000  | 0.0012  | 0.0004  |
| TPOX    | Fst | 0.0072  | 0.0051  | 0.0123  | 0.0002  | 0.0135  | 0.0099  | 0.0141  | 0.0110  | 0.0097  | 0.0157  | 0.0057  | 0.0110 | 0.0101  | 0.0122  | -0.0072 |
|         | p   | 0.0365  | 0.1461  | 0.0306  | 0.3507  | 0.0214  | 0.0465  | 0.0062  | 0.0055  | 0.0115  | 0.0023  | 0.0438  | 0.0072 | 0.0371  | 0.0577  | 0.8962  |
| VWA     | Fst | -0.0010 | -0.0047 | -0.0015 | 0.0007  | -0.0013 | -0.0011 | -0.0012 | 0.0007  | 0.0009  | 0.0034  | 0.0008  | 0.0084 | 0.0078  | 0.0040  | 0.0051  |
|         | p   | 0.6034  | 0.9329  | 0.5934  | 0.3519  | 0.5763  | 0.5366  | 0.6334  | 0.2680  | 0.2436  | 0.0587  | 0.2749  | 0.0040 | 0.0317  | 0.1730  | 0.1601  |

Continue Table S10:

| Loci    |     | HebeiChengde-<br>Manchu | Liaoning-<br>Hui | Gansu-Hui | Yunnan-Bai | Yunnan-<br>Vietnamese | Yunnan-<br>MiaoS | Yunnan-<br>Yi | Yunnan-<br>Zhuang | Yunnan-<br>Dai | Yunnan-<br>Hani | Yili-Xibe | Liangshan-<br>Yi | Hainan-<br>Han |
|---------|-----|-------------------------|------------------|-----------|------------|-----------------------|------------------|---------------|-------------------|----------------|-----------------|-----------|------------------|----------------|
| CSF1PO  | Fst | -0.0014                 | -0.0027          | -0.0033   | -0.0009    | 0.0311                | 0.0394           | -0.0009       | -0.0017           | 0.0039         | -0.0049         | 0.0031    | 0.0079           | -0.0043        |
|         | p   | 0.6040                  | 0.7352           | 0.8433    | 0.5438     | 0.0000                | 0.0000           | 0.5159        | 0.5888            | 0.1801         | 0.9799          | 0.1675    | 0.0597           | 0.9495         |
| D2S1338 | Fst | -0.0003                 | 0.0044           | -0.0001   | -0.0010    | 0.0026                | 0.0083           | 0.0005        | 0.0036            | 0.0049         | -0.0033         | -0.0021   | -0.0022          | 0.0049         |
|         | p   | 0.4778                  | 0.0657           | 0.4334    | 0.7113     | 0.0985                | 0.0029           | 0.3260        | 0.0858            | 0.1020         | 0.9072          | 0.7861    | 0.7550           | 0.0622         |
| D3S1358 | Fst | 0.0021                  | -0.0003          | 0.0085    | 0.0002     | 0.0283                | 0.0263           | -0.0014       | 0.0066            | 0.0087         | 0.0098          | -0.0038   | -0.0042          | 0.0112         |
|         | p   | 0.1915                  | 0.3966           | 0.0386    | 0.3487     | 0.0000                | 0.0001           | 0.6015        | 0.0698            | 0.0813         | 0.0421          | 0.8973    | 0.8823           | 0.0273         |
| D5S818  | Fst | -0.0027                 | -0.0039          | -0.0018   | -0.0011    | 0.0011                | 0.0047           | -0.0013       | -0.0012           | 0.0043         | -0.0013         | -0.0032   | -0.0038          | -0.0025        |
|         | p   | 0.9143                  | 0.9586           | 0.6324    | 0.6346     | 0.2511                | 0.0537           | 0.6444        | 0.5658            | 0.1595         | 0.5416          | 0.8784    | 0.8928           | 0.7358         |
| D6S1043 | Fst | -0.0008                 | -0.0005          | 0.0018    | 0.0006     | 0.0007                | 0.0019           | 0.0003        | 0.0002            | 0.0027         | 0.0032          | -0.0012   | -0.0040          | 0.0190         |
|         | p   | 0.5933                  | 0.5141           | 0.2044    | 0.2966     | 0.2776                | 0.1212           | 0.3512        | 0.3856            | 0.1992         | 0.1276          | 0.6346    | 0.9861           | 0.0000         |
| D7S820  | Fst | 0.0068                  | -0.0004          | 0.0021    | 0.0032     | 0.0488                | 0.0515           | 0.0058        | 0.0185            | 0.0278         | 0.0070          | -0.0009   | -0.0030          | 0.0092         |
|         | p   | 0.0264                  | 0.4368           | 0.2062    | 0.0790     | 0.0000                | 0.0000           | 0.0284        | 0.0006            | 0.0009         | 0.0586          | 0.5104    | 0.7968           | 0.0262         |
| D8S1179 | Fst | 0.0055                  | 0.0020           | 0.0055    | 0.0048     | 0.0539                | 0.0753           | 0.0189        | 0.0232            | 0.0276         | 0.0032          | 0.0076    | -0.0001          | 0.0086         |
|         | p   | 0.0259                  | 0.2087           | 0.0550    | 0.0191     | 0.0000                | 0.0000           | 0.0000        | 0.0000            | 0.0002         | 0.1489          | 0.0214    | 0.4297           | 0.0172         |
| D12S391 | Fst | -0.0011                 | -0.0003          | -0.0009   | -0.0019    | 0.0281                | 0.0407           | 0.0079        | 0.0091            | 0.0008         | 0.0004          | 0.2191    | 0.0391           | 0.0025         |
|         | p   | 0.6422                  | 0.4458           | 0.5573    | 0.9226     | 0.0000                | 0.0000           | 0.0044        | 0.0066            | 0.3388         | 0.3682          | 0.0000    | 0.0000           | 0.1678         |
| D13S317 | Fst | 0.0003                  | -0.0019          | -0.0030   | 0.0014     | 0.0434                | 0.0791           | 0.0025        | 0.0099            | 0.0093         | 0.0041          | -0.0014   | -0.0025          | 0.0009         |
|         | p   | 0.3608                  | 0.6773           | 0.8703    | 0.2006     | 0.0000                | 0.0000           | 0.1345        | 0.0118            | 0.0432         | 0.1178          | 0.5994    | 0.7416           | 0.3057         |
| D16S539 | Fst | 0.0296                  | 0.0223           | 0.0154    | 0.0124     | 0.0499                | 0.1110           | 0.0127        | 0.0088            | 0.0253         | 0.0247          | 0.0183    | 0.0188           | 0.0147         |
|         | p   | 0.0000                  | 0.0004           | 0.0034    | 0.0010     | 0.0000                | 0.0000           | 0.0012        | 0.0238            | 0.0024         | 0.0004          | 0.0009    | 0.0024           | 0.0053         |
| D18S51  | Fst | 0.0041                  | 0.0051           | 0.0095    | 0.0069     | 0.0103                | 0.0151           | 0.0143        | 0.0169            | 0.0123         | 0.0071          | 0.0056    | 0.0017           | 0.0094         |
|         | p   | 0.0517                  | 0.0543           | 0.0091    | 0.0047     | 0.0008                | 0.0001           | 0.0000        | 0.0001            | 0.0161         | 0.0377          | 0.0455    | 0.2266           | 0.0116         |
| D19S433 | Fst | 0.0008                  | -0.0024          | 0.0005    | -0.0004    | 0.0250                | 0.0335           | 0.0051        | 0.0038            | -0.0001        | 0.0025          | 0.0007    | -0.0016          | -0.0020        |
|         | p   | 0.2832                  | 0.8083           | 0.3324    | 0.5146     | 0.0000                | 0.0000           | 0.0253        | 0.0897            | 0.4104         | 0.1813          | 0.3197    | 0.6414           | 0.7125         |
| D21S11  | Fst | 0.0018                  | 0.0003           | -0.0004   | 0.0009     | 0.0014                | 0.0061           | 0.0018        | -0.0007           | -0.0020        | 0.0002          | -0.0022   | -0.0030          | -0.0021        |
|         | p   | 0.1758                  | 0.3634           | 0.4624    | 0.2368     | 0.2025                | 0.0104           | 0.1570        | 0.5168            | 0.6424         | 0.3809          | 0.7858    | 0.8842           | 0.7388         |
| FGA     | Fst | -0.0020                 | -0.0006          | -0.0016   | 0.0015     | 0.0080                | 0.0175           | 0.0110        | 0.0074            | 0.0079         | 0.0105          | -0.0020   | 0.0013           | 0.0052         |
|         | p   | 0.8800                  | 0.5046           | 0.7132    | 0.1460     | 0.0026                | 0.0000           | 0.0002        | 0.0087            | 0.0374         | 0.0064          | 0.7719    | 0.2678           | 0.0429         |

|        |     |         |         |         |         |        |        |        |        |         |         |         |         |         |
|--------|-----|---------|---------|---------|---------|--------|--------|--------|--------|---------|---------|---------|---------|---------|
| PentaD | Fst | 0.0039  | 0.0006  | 0.0031  | 0.0074  | 0.0122 | 0.0162 | 0.0139 | 0.0181 | 0.0339  | 0.0079  | 0.0036  | 0.0069  | 0.0186  |
|        | p   | 0.0712  | 0.3413  | 0.1372  | 0.0058  | 0.0012 | 0.0000 | 0.0002 | 0.0002 | 0.0000  | 0.0393  | 0.1169  | 0.0480  | 0.0006  |
| PentaE | Fst | -0.0019 | -0.0034 | -0.0001 | 0.0020  | 0.0023 | 0.0735 | 0.0024 | 0.0146 | 0.0153  | 0.0078  | -0.0004 | -0.0017 | -0.0015 |
|        | p   | 0.9266  | 0.9933  | 0.4498  | 0.0716  | 0.0694 | 0.0000 | 0.0592 | 0.0001 | 0.0002  | 0.0083  | 0.5289  | 0.7645  | 0.7676  |
| TH01   | Fst | -0.0018 | -0.0023 | 0.0019  | -0.0024 | 0.0119 | 0.0177 | 0.0037 | 0.0101 | -0.0022 | -0.0007 | -0.0015 | -0.0022 | 0.0003  |
|        | p   | 0.6712  | 0.6733  | 0.2201  | 0.9358  | 0.0051 | 0.0008 | 0.1034 | 0.0302 | 0.5539  | 0.4395  | 0.5484  | 0.6261  | 0.3446  |
| TPOX   | Fst | 0.0137  | 0.0084  | 0.0017  | 0.0083  | 0.1059 | 0.1190 | 0.0038 | 0.0034 | 0.0043  | -0.0051 | 0.0067  | 0.0109  | 0.0047  |
|        | p   | 0.0094  | 0.0550  | 0.2431  | 0.0168  | 0.0000 | 0.0000 | 0.1089 | 0.1576 | 0.1844  | 0.9713  | 0.0800  | 0.0405  | 0.1356  |
| VWA    | Fst | -0.0022 | -0.0018 | 0.0016  | 0.0003  | 0.0189 | 0.0321 | 0.0045 | 0.0068 | 0.0011  | 0.0012  | 0.0001  | -0.0007 | 0.0043  |
|        | p   | 0.8295  | 0.6687  | 0.2496  | 0.3546  | 0.0000 | 0.0000 | 0.0519 | 0.0356 | 0.3297  | 0.2897  | 0.4059  | 0.4724  | 0.1198  |

---



**Table S11.** The Nei's standard genetic distances between three studied populations and 56 other previously published Chinese populations.

| Populations                | [01]   | [02]   | [03]   | [04]   | [05]   | [06]   | [07]   | [08]   | [09]   | [10]   | [11]   | [12]   | [13]   | [14]   | [15]   | [16]   | [17]   | [18]   | [19]   | [20]   |
|----------------------------|--------|--------|--------|--------|--------|--------|--------|--------|--------|--------|--------|--------|--------|--------|--------|--------|--------|--------|--------|--------|
| [01] Hainan Han            |        |        |        |        |        |        |        |        |        |        |        |        |        |        |        |        |        |        |        |        |
| [02] Sichuan Yi            | 0.0302 |        |        |        |        |        |        |        |        |        |        |        |        |        |        |        |        |        |        |        |
| [03] Sichuan Tibetan       | 0.0416 | 0.0234 |        |        |        |        |        |        |        |        |        |        |        |        |        |        |        |        |        |        |
| [04] Tibet Tibetan[1]      | 0.0423 | 0.0241 | 0.0272 |        |        |        |        |        |        |        |        |        |        |        |        |        |        |        |        |        |
| [05] Sichuan Han1[2]       | 0.0121 | 0.0163 | 0.0296 | 0.0287 |        |        |        |        |        |        |        |        |        |        |        |        |        |        |        |        |
| [06] Sichuan Han2[3]       | 0.0122 | 0.0135 | 0.0265 | 0.0261 | 0.0018 |        |        |        |        |        |        |        |        |        |        |        |        |        |        |        |
| [07] Sichuan Han3          | 0.0161 | 0.0129 | 0.0268 | 0.0285 | 0.0060 | 0.0043 |        |        |        |        |        |        |        |        |        |        |        |        |        |        |
| [08] Chongqing Han[4]      | 0.0137 | 0.0167 | 0.0278 | 0.0282 | 0.0026 | 0.0021 | 0.0048 |        |        |        |        |        |        |        |        |        |        |        |        |        |
| [09] Gansu Han[5]          | 0.0245 | 0.0171 | 0.0270 | 0.0293 | 0.0111 | 0.0094 | 0.0105 | 0.0093 |        |        |        |        |        |        |        |        |        |        |        |        |
| [10] Inner Mongolia Han[6] | 0.0174 | 0.0128 | 0.0254 | 0.0254 | 0.0066 | 0.0047 | 0.0056 | 0.0059 | 0.0096 |        |        |        |        |        |        |        |        |        |        |        |
| [11] Hunan Han[2]          | 0.0157 | 0.0154 | 0.0291 | 0.0300 | 0.0035 | 0.0027 | 0.0062 | 0.0036 | 0.0099 | 0.0073 |        |        |        |        |        |        |        |        |        |        |
| [12] Henan Han1[2]         | 0.0248 | 0.0175 | 0.0290 | 0.0286 | 0.0108 | 0.0095 | 0.0093 | 0.0111 | 0.0135 | 0.0076 | 0.0105 |        |        |        |        |        |        |        |        |        |
| [13] Henan Han2[7]         | 0.0217 | 0.0125 | 0.0237 | 0.0246 | 0.0079 | 0.0063 | 0.0067 | 0.0079 | 0.0106 | 0.0043 | 0.0089 | 0.0088 |        |        |        |        |        |        |        |        |
| [14] Hubei Han1[2]         | 0.0159 | 0.0121 | 0.0246 | 0.0246 | 0.0037 | 0.0020 | 0.0048 | 0.0035 | 0.0097 | 0.0041 | 0.0047 | 0.0074 | 0.0047 |        |        |        |        |        |        |        |
| [15] Hubei Han2[8]         | 0.0130 | 0.0130 | 0.0250 | 0.0270 | 0.0024 | 0.0014 | 0.0038 | 0.0029 | 0.0088 | 0.0040 | 0.0029 | 0.0082 | 0.0051 | 0.0018 |        |        |        |        |        |        |
| [16] Jiangxi Han[2]        | 0.0141 | 0.0178 | 0.0291 | 0.0297 | 0.0037 | 0.0026 | 0.0063 | 0.0037 | 0.0120 | 0.0072 | 0.0040 | 0.0114 | 0.0082 | 0.0041 | 0.0025 |        |        |        |        |        |
| [17] Guangxi Han[2]        | 0.0149 | 0.0314 | 0.0457 | 0.0451 | 0.0096 | 0.0086 | 0.0173 | 0.0096 | 0.0231 | 0.0177 | 0.0089 | 0.0248 | 0.0209 | 0.0139 | 0.0117 | 0.0100 |        |        |        |        |
| [18] Guangdong Han[9]      | 0.0129 | 0.0127 | 0.0242 | 0.0253 | 0.0032 | 0.0016 | 0.0045 | 0.0029 | 0.0089 | 0.0043 | 0.0031 | 0.0095 | 0.0055 | 0.0028 | 0.0019 | 0.0034 | 0.0092 |        |        |        |
| [19] Guangzhou Han[2]      | 0.0107 | 0.0204 | 0.0334 | 0.0354 | 0.0045 | 0.0034 | 0.0098 | 0.0048 | 0.0163 | 0.0113 | 0.0044 | 0.0167 | 0.0136 | 0.0070 | 0.0052 | 0.0047 | 0.0033 | 0.0043 |        |        |
| [20] Dongguan Han[2]       | 0.0124 | 0.0235 | 0.0333 | 0.0374 | 0.0067 | 0.0048 | 0.0111 | 0.0064 | 0.0165 | 0.0125 | 0.0064 | 0.0173 | 0.0151 | 0.0082 | 0.0069 | 0.0055 | 0.0047 | 0.0061 | 0.0021 |        |
| [21] Foshan Han[2]         | 0.0141 | 0.0244 | 0.0379 | 0.0399 | 0.0077 | 0.0065 | 0.0135 | 0.0076 | 0.0197 | 0.0144 | 0.0072 | 0.0213 | 0.0174 | 0.0102 | 0.0085 | 0.0079 | 0.0039 | 0.0065 | 0.0018 | 0.0043 |
| [22] Jiangmen Han[2]       | 0.0113 | 0.0233 | 0.0356 | 0.0372 | 0.0063 | 0.0050 | 0.0119 | 0.0062 | 0.0176 | 0.0132 | 0.0059 | 0.0189 | 0.0162 | 0.0090 | 0.0071 | 0.0059 | 0.0030 | 0.0058 | 0.0013 | 0.0028 |
| [23] Maoming Han[2]        | 0.0142 | 0.0246 | 0.0390 | 0.0379 | 0.0080 | 0.0060 | 0.0122 | 0.0072 | 0.0181 | 0.0139 | 0.0070 | 0.0188 | 0.0158 | 0.0095 | 0.0077 | 0.0066 | 0.0052 | 0.0062 | 0.0030 | 0.0043 |
| [24] Qingyuan Han[2]       | 0.0126 | 0.0230 | 0.0366 | 0.0382 | 0.0068 | 0.0057 | 0.0113 | 0.0069 | 0.0187 | 0.0133 | 0.0059 | 0.0175 | 0.0158 | 0.0090 | 0.0072 | 0.0065 | 0.0047 | 0.0062 | 0.0018 | 0.0038 |
| [25] Yangjiang Han[2]      | 0.0114 | 0.0233 | 0.0368 | 0.0376 | 0.0051 | 0.0045 | 0.0109 | 0.0053 | 0.0160 | 0.0117 | 0.0053 | 0.0175 | 0.0146 | 0.0080 | 0.0060 | 0.0052 | 0.0032 | 0.0048 | 0.0012 | 0.0028 |
| [26] Zhanjiang Han[2]      | 0.0122 | 0.0268 | 0.0383 | 0.0410 | 0.0081 | 0.0070 | 0.0145 | 0.0081 | 0.0191 | 0.0146 | 0.0083 | 0.0205 | 0.0172 | 0.0111 | 0.0088 | 0.0087 | 0.0048 | 0.0085 | 0.0030 | 0.0040 |
| [27] Zhaoqing Han[2]       | 0.0131 | 0.0257 | 0.0382 | 0.0405 | 0.0076 | 0.0060 | 0.0130 | 0.0070 | 0.0188 | 0.0150 | 0.0059 | 0.0206 | 0.0183 | 0.0108 | 0.0084 | 0.0068 | 0.0026 | 0.0066 | 0.0017 | 0.0027 |
| [28] Zhongshan Han[2]      | 0.0132 | 0.0232 | 0.0367 | 0.0386 | 0.0074 | 0.0065 | 0.0130 | 0.0080 | 0.0198 | 0.0142 | 0.0068 | 0.0196 | 0.0179 | 0.0101 | 0.0079 | 0.0066 | 0.0050 | 0.0067 | 0.0019 | 0.0033 |
| [29] Minnan Han[10]        | 0.0159 | 0.0196 | 0.0326 | 0.0338 | 0.0068 | 0.0055 | 0.0084 | 0.0065 | 0.0143 | 0.0088 | 0.0069 | 0.0139 | 0.0105 | 0.0072 | 0.0061 | 0.0063 | 0.0119 | 0.0063 | 0.0070 | 0.0073 |

|                           |        |        |        |        |        |        |        |        |        |        |        |        |        |        |        |        |        |        |        |        |
|---------------------------|--------|--------|--------|--------|--------|--------|--------|--------|--------|--------|--------|--------|--------|--------|--------|--------|--------|--------|--------|--------|
| [30] Minxi Han[11]        | 0.0119 | 0.0168 | 0.0315 | 0.0296 | 0.0035 | 0.0028 | 0.0071 | 0.0041 | 0.0126 | 0.0073 | 0.0033 | 0.0123 | 0.0095 | 0.0048 | 0.0032 | 0.0040 | 0.0070 | 0.0031 | 0.0032 | 0.0052 |
| [31] Xiamen Han[12]       | 0.0111 | 0.0145 | 0.0260 | 0.0277 | 0.0026 | 0.0012 | 0.0046 | 0.0026 | 0.0099 | 0.0047 | 0.0031 | 0.0095 | 0.0063 | 0.0024 | 0.0010 | 0.0019 | 0.0095 | 0.0019 | 0.0035 | 0.0048 |
| [32] Beijing Han[13]      | 0.0241 | 0.0159 | 0.0218 | 0.0283 | 0.0095 | 0.0072 | 0.0098 | 0.0085 | 0.0108 | 0.0074 | 0.0097 | 0.0125 | 0.0075 | 0.0076 | 0.0066 | 0.0089 | 0.0231 | 0.0072 | 0.0151 | 0.0166 |
| [33] Tianjin Han[14]      | 0.0180 | 0.0144 | 0.0252 | 0.0256 | 0.0060 | 0.0049 | 0.0058 | 0.0056 | 0.0087 | 0.0043 | 0.0074 | 0.0081 | 0.0051 | 0.0035 | 0.0035 | 0.0059 | 0.0211 | 0.0052 | 0.0124 | 0.0134 |
| [34] Shanghai Han[15]     | 0.0161 | 0.0117 | 0.0252 | 0.0260 | 0.0043 | 0.0030 | 0.0040 | 0.0041 | 0.0096 | 0.0050 | 0.0051 | 0.0085 | 0.0053 | 0.0030 | 0.0022 | 0.0042 | 0.0154 | 0.0032 | 0.0076 | 0.0098 |
| [35] Huaian Han[16]       | 0.0255 | 0.0170 | 0.0292 | 0.0324 | 0.0109 | 0.0091 | 0.0089 | 0.0099 | 0.0140 | 0.0095 | 0.0103 | 0.0138 | 0.0103 | 0.0079 | 0.0076 | 0.0096 | 0.0233 | 0.0083 | 0.0153 | 0.0168 |
| [36] Yangzhou Han[16]     | 0.0215 | 0.0166 | 0.0291 | 0.0276 | 0.0089 | 0.0078 | 0.0090 | 0.0094 | 0.0127 | 0.0072 | 0.0109 | 0.0112 | 0.0089 | 0.0067 | 0.0072 | 0.0087 | 0.0249 | 0.0089 | 0.0154 | 0.0163 |
| [37] Taizhou Han[16]      | 0.0309 | 0.0289 | 0.0374 | 0.0350 | 0.0197 | 0.0186 | 0.0235 | 0.0210 | 0.0281 | 0.0211 | 0.0210 | 0.0249 | 0.0209 | 0.0188 | 0.0187 | 0.0193 | 0.0306 | 0.0190 | 0.0229 | 0.0254 |
| [38] Suzhou Han[16]       | 0.0235 | 0.0160 | 0.0291 | 0.0279 | 0.0109 | 0.0094 | 0.0089 | 0.0098 | 0.0129 | 0.0070 | 0.0109 | 0.0112 | 0.0078 | 0.0072 | 0.0069 | 0.0103 | 0.0248 | 0.0084 | 0.0170 | 0.0180 |
| [39] Shandong Han[17]     | 0.0191 | 0.0142 | 0.0273 | 0.0289 | 0.0084 | 0.0076 | 0.0091 | 0.0090 | 0.0138 | 0.0080 | 0.0110 | 0.0136 | 0.0086 | 0.0078 | 0.0072 | 0.0097 | 0.0220 | 0.0081 | 0.0136 | 0.0153 |
| [40] Shanxi Han[18]       | 0.0181 | 0.0131 | 0.0212 | 0.0222 | 0.0085 | 0.0064 | 0.0073 | 0.0078 | 0.0098 | 0.0055 | 0.0092 | 0.0088 | 0.0051 | 0.0047 | 0.0054 | 0.0093 | 0.0221 | 0.0060 | 0.0131 | 0.0148 |
| [41] Jiujiang Han[19]     | 0.0118 | 0.0130 | 0.0266 | 0.0275 | 0.0023 | 0.0009 | 0.0039 | 0.0021 | 0.0084 | 0.0038 | 0.0027 | 0.0085 | 0.0055 | 0.0018 | 0.0009 | 0.0021 | 0.0099 | 0.0014 | 0.0038 | 0.0053 |
| [42] Yunnan Han[20]       | 0.0123 | 0.0125 | 0.0241 | 0.0262 | 0.0028 | 0.0012 | 0.0039 | 0.0028 | 0.0077 | 0.0039 | 0.0029 | 0.0078 | 0.0050 | 0.0017 | 0.0008 | 0.0025 | 0.0110 | 0.0015 | 0.0048 | 0.0060 |
| [43] Yungui Han[21]       | 0.0134 | 0.0133 | 0.0271 | 0.0256 | 0.0022 | 0.0011 | 0.0042 | 0.0023 | 0.0093 | 0.0045 | 0.0032 | 0.0087 | 0.0059 | 0.0019 | 0.0019 | 0.0033 | 0.0103 | 0.0022 | 0.0049 | 0.0061 |
| [44] Taiwan Han           | 0.0115 | 0.0190 | 0.0301 | 0.0346 | 0.0041 | 0.0034 | 0.0064 | 0.0042 | 0.0129 | 0.0075 | 0.0044 | 0.0129 | 0.0096 | 0.0057 | 0.0036 | 0.0040 | 0.0075 | 0.0036 | 0.0037 | 0.0045 |
| [45] Xinjiang Uyghur1[22] | 0.0465 | 0.0367 | 0.0422 | 0.0414 | 0.0365 | 0.0344 | 0.0321 | 0.0360 | 0.0350 | 0.0319 | 0.0331 | 0.0337 | 0.0331 | 0.0337 | 0.0323 | 0.0353 | 0.0432 | 0.0300 | 0.0374 | 0.0387 |
| [46] Xinjiang Uyghur2[23] | 0.0587 | 0.0452 | 0.0488 | 0.0498 | 0.0483 | 0.0470 | 0.0455 | 0.0486 | 0.0471 | 0.0434 | 0.0455 | 0.0461 | 0.0415 | 0.0452 | 0.0444 | 0.0486 | 0.0562 | 0.0416 | 0.0503 | 0.0519 |
| [47] Xinjiang Uyghur3[1]  | 0.0644 | 0.0562 | 0.0635 | 0.0631 | 0.0567 | 0.0549 | 0.0537 | 0.0581 | 0.0579 | 0.0529 | 0.0527 | 0.0542 | 0.0549 | 0.0547 | 0.0537 | 0.0576 | 0.0636 | 0.0504 | 0.0571 | 0.0594 |
| [48] Xinjiang Kazakh[24]  | 0.0688 | 0.0524 | 0.0520 | 0.0602 | 0.0581 | 0.0543 | 0.0534 | 0.0572 | 0.0576 | 0.0506 | 0.0544 | 0.0530 | 0.0530 | 0.0523 | 0.0525 | 0.0562 | 0.0654 | 0.0483 | 0.0565 | 0.0599 |
| [49] Hebei Manchu[25]     | 0.0192 | 0.0123 | 0.0245 | 0.0259 | 0.0070 | 0.0060 | 0.0066 | 0.0071 | 0.0095 | 0.0051 | 0.0081 | 0.0097 | 0.0055 | 0.0046 | 0.0044 | 0.0073 | 0.0214 | 0.0060 | 0.0132 | 0.0139 |
| [50] Liaoning Hui[26]     | 0.0178 | 0.0137 | 0.0224 | 0.0257 | 0.0082 | 0.0074 | 0.0076 | 0.0088 | 0.0122 | 0.0076 | 0.0094 | 0.0116 | 0.0086 | 0.0074 | 0.0063 | 0.0082 | 0.0208 | 0.0059 | 0.0123 | 0.0150 |
| [51] Gansu Hui[27]        | 0.0264 | 0.0219 | 0.0264 | 0.0255 | 0.0148 | 0.0142 | 0.0159 | 0.0145 | 0.0160 | 0.0135 | 0.0171 | 0.0185 | 0.0142 | 0.0141 | 0.0134 | 0.0167 | 0.0294 | 0.0136 | 0.0217 | 0.0223 |
| [52] Yunnan Bai[28]       | 0.0160 | 0.0126 | 0.0199 | 0.0225 | 0.0059 | 0.0042 | 0.0069 | 0.0059 | 0.0110 | 0.0065 | 0.0073 | 0.0101 | 0.0068 | 0.0046 | 0.0044 | 0.0069 | 0.0160 | 0.0047 | 0.0089 | 0.0101 |
| [53] Yunan Vietnamese[29] | 0.0629 | 0.0758 | 0.1084 | 0.0789 | 0.0489 | 0.0481 | 0.0564 | 0.0496 | 0.0702 | 0.0583 | 0.0505 | 0.0647 | 0.0619 | 0.0551 | 0.0539 | 0.0517 | 0.0447 | 0.0528 | 0.0502 | 0.0530 |
| [54] Yunnan Miao[30]      | 0.0945 | 0.1100 | 0.1437 | 0.1103 | 0.0781 | 0.0773 | 0.0842 | 0.0787 | 0.1023 | 0.0880 | 0.0817 | 0.0940 | 0.0919 | 0.0850 | 0.0841 | 0.0819 | 0.0775 | 0.0842 | 0.0823 | 0.0840 |
| [55] Yunnan Yi[31]        | 0.0256 | 0.0269 | 0.0392 | 0.0466 | 0.0166 | 0.0151 | 0.0190 | 0.0168 | 0.0249 | 0.0229 | 0.0160 | 0.0273 | 0.0261 | 0.0192 | 0.0176 | 0.0184 | 0.0150 | 0.0148 | 0.0127 | 0.0144 |
| [56] Yunan Zhuang[32]     | 0.0240 | 0.0408 | 0.0526 | 0.0558 | 0.0190 | 0.0181 | 0.0275 | 0.0206 | 0.0337 | 0.0311 | 0.0190 | 0.0371 | 0.0331 | 0.0251 | 0.0219 | 0.0198 | 0.0087 | 0.0195 | 0.0110 | 0.0124 |
| [57] Yunan Dai[32]        | 0.0239 | 0.0404 | 0.0618 | 0.0587 | 0.0191 | 0.0195 | 0.0253 | 0.0190 | 0.0351 | 0.0335 | 0.0187 | 0.0367 | 0.0359 | 0.0242 | 0.0219 | 0.0203 | 0.0133 | 0.0212 | 0.0123 | 0.0161 |
| [58] Yunnan Hani[32]      | 0.0206 | 0.0245 | 0.0359 | 0.0450 | 0.0190 | 0.0164 | 0.0194 | 0.0201 | 0.0263 | 0.0207 | 0.0204 | 0.0282 | 0.0235 | 0.0185 | 0.0173 | 0.0204 | 0.0251 | 0.0176 | 0.0183 | 0.0197 |
| [59] Yili Xibe[33]        | 0.0295 | 0.0145 | 0.0235 | 0.0253 | 0.0126 | 0.0116 | 0.0108 | 0.0126 | 0.0159 | 0.0108 | 0.0117 | 0.0139 | 0.0115 | 0.0110 | 0.0104 | 0.0130 | 0.0286 | 0.0104 | 0.0188 | 0.0217 |

Continue Table S11:

| Populations               | [21]   | [22]   | [23]   | [24]   | [25]   | [26]   | [27]   | [28]   | [29]   | [30]   | [31]   | [32]   | [33]   | [34]   | [35]   | [36]   | [37]   | [38]   | [39]   | [40]   |
|---------------------------|--------|--------|--------|--------|--------|--------|--------|--------|--------|--------|--------|--------|--------|--------|--------|--------|--------|--------|--------|--------|
| [22] Jiangmen Han[2]      | 0.0028 |        |        |        |        |        |        |        |        |        |        |        |        |        |        |        |        |        |        |        |
| [23] Maoming Han[2]       | 0.0048 | 0.0042 |        |        |        |        |        |        |        |        |        |        |        |        |        |        |        |        |        |        |
| [24] Qingyuan Han[2]      | 0.0038 | 0.0027 | 0.0034 |        |        |        |        |        |        |        |        |        |        |        |        |        |        |        |        |        |
| [25] Yangjiang Han[2]     | 0.0025 | 0.0018 | 0.0030 | 0.0025 |        |        |        |        |        |        |        |        |        |        |        |        |        |        |        |        |
| [26] Zhanjiang Han[2]     | 0.0052 | 0.0040 | 0.0040 | 0.0039 | 0.0035 |        |        |        |        |        |        |        |        |        |        |        |        |        |        |        |
| [27] Zhaoqing Han[2]      | 0.0030 | 0.0022 | 0.0029 | 0.0028 | 0.0021 | 0.0035 |        |        |        |        |        |        |        |        |        |        |        |        |        |        |
| [28] Zhongshan Han[2]     | 0.0032 | 0.0027 | 0.0045 | 0.0034 | 0.0029 | 0.0050 | 0.0036 |        |        |        |        |        |        |        |        |        |        |        |        |        |
| [29] Minnan Han[10]       | 0.0097 | 0.0084 | 0.0101 | 0.0084 | 0.0076 | 0.0092 | 0.0094 | 0.0103 |        |        |        |        |        |        |        |        |        |        |        |        |
| [30] Minxi Han[11]        | 0.0061 | 0.0046 | 0.0048 | 0.0044 | 0.0041 | 0.0070 | 0.0052 | 0.0056 | 0.0063 |        |        |        |        |        |        |        |        |        |        |        |
| [31] Xiamen Han[12]       | 0.0067 | 0.0050 | 0.0059 | 0.0057 | 0.0042 | 0.0066 | 0.0063 | 0.0062 | 0.0051 | 0.0024 |        |        |        |        |        |        |        |        |        |        |
| [32] Beijing Han[13]      | 0.0186 | 0.0168 | 0.0174 | 0.0184 | 0.0159 | 0.0191 | 0.0188 | 0.0191 | 0.0119 | 0.0116 | 0.0072 |        |        |        |        |        |        |        |        |        |
| [33] Tianjin Han[14]      | 0.0169 | 0.0146 | 0.0140 | 0.0146 | 0.0124 | 0.0160 | 0.0161 | 0.0158 | 0.0102 | 0.0083 | 0.0043 | 0.0068 |        |        |        |        |        |        |        |        |
| [34] Shanghai Han[15]     | 0.0117 | 0.0093 | 0.0095 | 0.0091 | 0.0087 | 0.0116 | 0.0111 | 0.0111 | 0.0072 | 0.0056 | 0.0027 | 0.0071 | 0.0044 |        |        |        |        |        |        |        |
| [35] Huaian Han[16]       | 0.0188 | 0.0169 | 0.0188 | 0.0179 | 0.0168 | 0.0228 | 0.0188 | 0.0190 | 0.0125 | 0.0112 | 0.0082 | 0.0110 | 0.0073 | 0.0074 |        |        |        |        |        |        |
| [36] Yangzhou Han[16]     | 0.0214 | 0.0181 | 0.0167 | 0.0177 | 0.0166 | 0.0194 | 0.0194 | 0.0184 | 0.0120 | 0.0109 | 0.0077 | 0.0097 | 0.0056 | 0.0065 | 0.0111 |        |        |        |        |        |
| [37] Taizhou Han[16]      | 0.0282 | 0.0252 | 0.0247 | 0.0242 | 0.0246 | 0.0275 | 0.0277 | 0.0255 | 0.0261 | 0.0214 | 0.0185 | 0.0220 | 0.0218 | 0.0170 | 0.0261 | 0.0221 |        |        |        |        |
| [38] Suzhou Han[16]       | 0.0217 | 0.0189 | 0.0189 | 0.0192 | 0.0177 | 0.0223 | 0.0215 | 0.0201 | 0.0151 | 0.0114 | 0.0087 | 0.0098 | 0.0065 | 0.0086 | 0.0106 | 0.0115 | 0.0249 |        |        |        |
| [39] Shandong Han[17]     | 0.0178 | 0.0155 | 0.0173 | 0.0163 | 0.0154 | 0.0169 | 0.0192 | 0.0163 | 0.0122 | 0.0105 | 0.0072 | 0.0087 | 0.0077 | 0.0081 | 0.0126 | 0.0085 | 0.0250 | 0.0111 |        |        |
| [40] Shanxi Han[18]       | 0.0173 | 0.0158 | 0.0159 | 0.0156 | 0.0145 | 0.0158 | 0.0178 | 0.0174 | 0.0114 | 0.0103 | 0.0061 | 0.0076 | 0.0047 | 0.0057 | 0.0110 | 0.0097 | 0.0214 | 0.0082 | 0.0091 |        |
| [41] Jiujiang Han[19]     | 0.0070 | 0.0055 | 0.0065 | 0.0059 | 0.0048 | 0.0077 | 0.0068 | 0.0066 | 0.0050 | 0.0023 | 0.0008 | 0.0068 | 0.0039 | 0.0021 | 0.0071 | 0.0066 | 0.0181 | 0.0073 | 0.0067 | 0.0056 |
| [42] Yunnan Han[20]       | 0.0081 | 0.0063 | 0.0070 | 0.0066 | 0.0058 | 0.0082 | 0.0079 | 0.0073 | 0.0058 | 0.0032 | 0.0011 | 0.0065 | 0.0036 | 0.0019 | 0.0076 | 0.0067 | 0.0178 | 0.0070 | 0.0065 | 0.0050 |
| [43] Yungui Han[21]       | 0.0083 | 0.0066 | 0.0072 | 0.0069 | 0.0057 | 0.0083 | 0.0078 | 0.0081 | 0.0052 | 0.0035 | 0.0020 | 0.0071 | 0.0042 | 0.0034 | 0.0091 | 0.0069 | 0.0190 | 0.0083 | 0.0074 | 0.0059 |
| [44] Taiwan Han           | 0.0059 | 0.0047 | 0.0058 | 0.0061 | 0.0039 | 0.0070 | 0.0053 | 0.0063 | 0.0057 | 0.0034 | 0.0023 | 0.0111 | 0.0081 | 0.0053 | 0.0108 | 0.0112 | 0.0231 | 0.0126 | 0.0111 | 0.0103 |
| [45] Xinjiang Uyghur1[22] | 0.0379 | 0.0391 | 0.0402 | 0.0378 | 0.0374 | 0.0439 | 0.0387 | 0.0405 | 0.0353 | 0.0346 | 0.0334 | 0.0370 | 0.0345 | 0.0316 | 0.0365 | 0.0398 | 0.0535 | 0.0388 | 0.0426 | 0.0340 |
| [46] Xinjiang Uyghur2[23] | 0.0506 | 0.0521 | 0.0543 | 0.0509 | 0.0507 | 0.0587 | 0.0523 | 0.0526 | 0.0497 | 0.0472 | 0.0463 | 0.0492 | 0.0457 | 0.0432 | 0.0463 | 0.0518 | 0.0609 | 0.0471 | 0.0541 | 0.0449 |
| [47] Xinjiang Uyghur3[1]  | 0.0580 | 0.0594 | 0.0619 | 0.0572 | 0.0581 | 0.0649 | 0.0592 | 0.0586 | 0.0595 | 0.0567 | 0.0558 | 0.0609 | 0.0567 | 0.0543 | 0.0587 | 0.0634 | 0.0723 | 0.0588 | 0.0656 | 0.0539 |
| [48] Xinjiang Kazakh[24]  | 0.0582 | 0.0572 | 0.0596 | 0.0549 | 0.0574 | 0.0659 | 0.0592 | 0.0577 | 0.0605 | 0.0546 | 0.0535 | 0.0562 | 0.0526 | 0.0494 | 0.0557 | 0.0577 | 0.0649 | 0.0591 | 0.0611 | 0.0515 |
| [49] Hebei Manchu[25]     | 0.0183 | 0.0151 | 0.0152 | 0.0156 | 0.0139 | 0.0168 | 0.0172 | 0.0169 | 0.0101 | 0.0087 | 0.0053 | 0.0080 | 0.0046 | 0.0048 | 0.0090 | 0.0069 | 0.0210 | 0.0059 | 0.0079 | 0.0064 |
| [50] Liaoning Hui[26]     | 0.0155 | 0.0145 | 0.0151 | 0.0141 | 0.0128 | 0.0175 | 0.0163 | 0.0153 | 0.0113 | 0.0095 | 0.0071 | 0.0096 | 0.0070 | 0.0071 | 0.0130 | 0.0107 | 0.0232 | 0.0118 | 0.0101 | 0.0077 |

|                           |        |        |        |        |        |        |        |        |        |        |        |        |        |        |        |        |        |        |        |        |
|---------------------------|--------|--------|--------|--------|--------|--------|--------|--------|--------|--------|--------|--------|--------|--------|--------|--------|--------|--------|--------|--------|
| [51] Gansu Hui[27]        | 0.0257 | 0.0229 | 0.0240 | 0.0242 | 0.0217 | 0.0266 | 0.0250 | 0.0252 | 0.0201 | 0.0174 | 0.0145 | 0.0160 | 0.0122 | 0.0128 | 0.0186 | 0.0181 | 0.0280 | 0.0157 | 0.0180 | 0.0138 |
| [52] Yunnan Bai[28]       | 0.0123 | 0.0110 | 0.0117 | 0.0113 | 0.0101 | 0.0123 | 0.0126 | 0.0116 | 0.0110 | 0.0075 | 0.0045 | 0.0092 | 0.0069 | 0.0053 | 0.0119 | 0.0102 | 0.0197 | 0.0116 | 0.0100 | 0.0066 |
| [53] Yunan Vietnamese[29] | 0.0540 | 0.0506 | 0.0515 | 0.0512 | 0.0507 | 0.0546 | 0.0497 | 0.0541 | 0.0509 | 0.0461 | 0.0543 | 0.0632 | 0.0598 | 0.0594 | 0.0618 | 0.0625 | 0.0812 | 0.0574 | 0.0619 | 0.0652 |
| [54] Yunnan Miao[30]      | 0.0881 | 0.0832 | 0.0823 | 0.0833 | 0.0835 | 0.0861 | 0.0814 | 0.0864 | 0.0795 | 0.0762 | 0.0851 | 0.0921 | 0.0873 | 0.0906 | 0.0905 | 0.0891 | 0.1154 | 0.0835 | 0.0891 | 0.0954 |
| [55] Yunnan Yi[31]        | 0.0144 | 0.0156 | 0.0150 | 0.0145 | 0.0135 | 0.0160 | 0.0126 | 0.0135 | 0.0213 | 0.0160 | 0.0170 | 0.0274 | 0.0245 | 0.0203 | 0.0290 | 0.0273 | 0.0388 | 0.0297 | 0.0275 | 0.0260 |
| [56] Yunan Zhuang[32]     | 0.0115 | 0.0115 | 0.0129 | 0.0122 | 0.0112 | 0.0112 | 0.0098 | 0.0131 | 0.0213 | 0.0175 | 0.0192 | 0.0348 | 0.0340 | 0.0259 | 0.0369 | 0.0358 | 0.0397 | 0.0388 | 0.0339 | 0.0343 |
| [57] Yunan Dai[32]        | 0.0129 | 0.0129 | 0.0150 | 0.0127 | 0.0132 | 0.0143 | 0.0130 | 0.0137 | 0.0244 | 0.0178 | 0.0195 | 0.0360 | 0.0325 | 0.0241 | 0.0343 | 0.0372 | 0.0412 | 0.0360 | 0.0339 | 0.0331 |
| [58] Yunnan Hani[32]      | 0.0205 | 0.0201 | 0.0214 | 0.0197 | 0.0185 | 0.0219 | 0.0216 | 0.0214 | 0.0190 | 0.0190 | 0.0162 | 0.0240 | 0.0206 | 0.0192 | 0.0252 | 0.0243 | 0.0387 | 0.0278 | 0.0221 | 0.0228 |
| [59] Yili Xibe[33]        | 0.0224 | 0.0212 | 0.0219 | 0.0191 | 0.0204 | 0.0253 | 0.0233 | 0.0217 | 0.0168 | 0.0144 | 0.0122 | 0.0118 | 0.0107 | 0.0093 | 0.0133 | 0.0137 | 0.0246 | 0.0132 | 0.0140 | 0.0111 |

**Continue Table S11:**

| Populations               | [41]   | [42]   | [43]   | [44]   | [45]   | [46]   | [47]   | [48]   | [49]   | [50]   | [51]   | [52]   | [53]   | [54]   | [55]   | [56]   | [57]   | [58]   | [59] |  |
|---------------------------|--------|--------|--------|--------|--------|--------|--------|--------|--------|--------|--------|--------|--------|--------|--------|--------|--------|--------|------|--|
| [42] Yunnan Han[20]       | 0.0006 |        |        |        |        |        |        |        |        |        |        |        |        |        |        |        |        |        |      |  |
| [43] Yungui Han[21]       | 0.0014 | 0.0015 |        |        |        |        |        |        |        |        |        |        |        |        |        |        |        |        |      |  |
| [44] Taiwan Han           | 0.0030 | 0.0034 | 0.0043 |        |        |        |        |        |        |        |        |        |        |        |        |        |        |        |      |  |
| [45] Xinjiang Uyghur1[22] | 0.0331 | 0.0318 | 0.0330 | 0.0318 |        |        |        |        |        |        |        |        |        |        |        |        |        |        |      |  |
| [46] Xinjiang Uyghur2[23] | 0.0453 | 0.0439 | 0.0459 | 0.0451 | 0.0100 |        |        |        |        |        |        |        |        |        |        |        |        |        |      |  |
| [47] Xinjiang Uyghur3[1]  | 0.0542 | 0.0539 | 0.0536 | 0.0557 | 0.0272 | 0.0308 |        |        |        |        |        |        |        |        |        |        |        |        |      |  |
| [48] Xinjiang Kazakh[24]  | 0.0528 | 0.0514 | 0.0551 | 0.0522 | 0.0240 | 0.0248 | 0.0453 |        |        |        |        |        |        |        |        |        |        |        |      |  |
| [49] Hebei Manchu[25]     | 0.0047 | 0.0042 | 0.0050 | 0.0093 | 0.0352 | 0.0451 | 0.0594 | 0.0556 |        |        |        |        |        |        |        |        |        |        |      |  |
| [50] Liaoning Hui[26]     | 0.0066 | 0.0062 | 0.0072 | 0.0100 | 0.0270 | 0.0369 | 0.0470 | 0.0437 | 0.0085 |        |        |        |        |        |        |        |        |        |      |  |
| [51] Gansu Hui[27]        | 0.0140 | 0.0132 | 0.0142 | 0.0162 | 0.0283 | 0.0347 | 0.0525 | 0.0474 | 0.0135 | 0.0139 |        |        |        |        |        |        |        |        |      |  |
| [52] Yunnan Bai[28]       | 0.0047 | 0.0039 | 0.0050 | 0.0071 | 0.0312 | 0.0419 | 0.0545 | 0.0480 | 0.0063 | 0.0087 | 0.0141 |        |        |        |        |        |        |        |      |  |
| [53] Yunan Vietnamese[29] | 0.0516 | 0.0549 | 0.0477 | 0.0553 | 0.1000 | 0.1217 | 0.1171 | 0.1356 | 0.0626 | 0.0664 | 0.0767 | 0.0642 |        |        |        |        |        |        |      |  |
| [54] Yunnan Miao[30]      | 0.0815 | 0.0853 | 0.0760 | 0.0859 | 0.1420 | 0.1673 | 0.1578 | 0.1793 | 0.0919 | 0.0992 | 0.1064 | 0.0963 | 0.0096 |        |        |        |        |        |      |  |
| [55] Yunnan Yi[31]        | 0.0167 | 0.0168 | 0.0162 | 0.0154 | 0.0385 | 0.0488 | 0.0592 | 0.0539 | 0.0254 | 0.0217 | 0.0334 | 0.0162 | 0.0657 | 0.1007 |        |        |        |        |      |  |
| [56] Yunan Zhuang[32]     | 0.0205 | 0.0212 | 0.0207 | 0.0170 | 0.0550 | 0.0720 | 0.0776 | 0.0822 | 0.0322 | 0.0323 | 0.0445 | 0.0255 | 0.0548 | 0.0911 | 0.0185 |        |        |        |      |  |
| [57] Yunan Dai[32]        | 0.0201 | 0.0215 | 0.0210 | 0.0186 | 0.0605 | 0.0778 | 0.0822 | 0.0858 | 0.0326 | 0.0328 | 0.0454 | 0.0275 | 0.0579 | 0.0910 | 0.0243 | 0.0167 |        |        |      |  |
| [58] Yunnan Hani[32]      | 0.0173 | 0.0165 | 0.0168 | 0.0165 | 0.0413 | 0.0552 | 0.0673 | 0.0617 | 0.0202 | 0.0212 | 0.0286 | 0.0165 | 0.0775 | 0.1113 | 0.0245 | 0.0305 | 0.0341 |        |      |  |
| [59] Yili Xibe[33]        | 0.0107 | 0.0103 | 0.0110 | 0.0157 | 0.0273 | 0.0352 | 0.0471 | 0.0417 | 0.0112 | 0.0095 | 0.0185 | 0.0122 | 0.0685 | 0.0998 | 0.0263 | 0.0409 | 0.0410 | 0.0298 |      |  |

- [1] Z. Wang, D. Zhou, Z. Jia, L. Li, W. Wu, C. Li, et al., Developmental Validation of the Huaxia Platinum System and application in 3 main ethnic groups of China, *Sci Rep* 6 (2016) 31075.
- [2] Q. Liu, Y. Chen, X. Huang, K. Liu, H. Zhao, D. Lu, Population data and mutation rates of 19 STR loci in seven provinces from China based on Goldeneye DNA ID System 20A, *Int J Legal Med* 131 (2017) 653-656.
- [3] G. He, Y. Li, Z. Wang, W. Liang, H. Luo, M. Liao, et al., Genetic diversity of 21 autosomal STR loci in the Han population from Sichuan province, Southwest China, *Forensic Sci Int Genet* (2017).
- [4] X. Zou, Y. Li, P. Li, Q. Nie, T. Wang, Y. Hu, et al., Genetic polymorphisms for 19 autosomal STR loci of Chongqing Han ethnicity and phylogenetic structure exploration among 28 Chinese populations, *Int J Legal Med* (2017).
- [5] W. Zhao, S. Hu, T. Wang, Genetic polymorphisms of 19 STR loci of Pingliang Han of Gansu province, *CHIN J FOENSIC MED* 30 (2015) 618-619.
- [6] J. Wang, Q. Zhong, Z. Zhai, H. Wang, J. Zhang, Y. Wang, Genetic Polymorphisms of 19 STR loci in the Inner Mongolia Han population, *Chin J Forensic Med* 30 (2015) 82-84.
- [7] H. Wang, D. Wu, Z. Feng, Z. Jing, T. Li, Q. Guo, et al., Genetic polymorphisms of 20 short tandem repeat loci from the Han population in Henan, China, *Electrophoresis* 35 (2014) 1509-1514.
- [8] C. Xiao, W. Zhang, T. Wei, C. Pan, D. Huang, Population data of 21 autosomal STR loci in Chinese Han population from Hubei province in Central China, *Forensic Sci Int Genet* 20 (2016) e13-14.
- [9] L. Yang, X. Zhang, L. Zhao, Y. Sun, J. Li, R. Huang, et al., Population data of 23 autosomal STR loci in the Chinese Han population from Guangdong Province in southern China, *Int J Legal Med* (2017).
- [10] Y. Wang, B. Lin, X. Chen, J. Cai, Q. Zhang, Genetic polymorphisms of 20 loci in Han population from Southern Fujian, *CHIN J FORENSIC MED* 29 (2014) 264-266.
- [11] Z. Zhang, T. Chen, Genetic polymorphisms of 20 STR loci in Han population from Western Fujian, *CHIN J FOENSIC MED* 30 (2015) 411-412.
- [12] Y. Lu, P. Song, J.C. Huang, X. Wu, Genetic polymorphisms of 20 autosomal STR loci in 5141 individuals from the Han population of Xiamen, Southeast China, *Forensic Sci Int Genet* 29 (2017) e31-e32.
- [13] X. Ruan, W. Wang, Y. Yang, B. Xie, J. Chen, Y. Liu, et al., Genetic variability and phylogenetic analysis of 39 short tandem repeat loci in Beijing Han population, *Yi Chuan* 37 (2015) 683-691.
- [14] P. Chen, B. Wang, G. He, F. Song, H. Luo, L. Zhang, et al., Population genetic analyses of 20 autosomal STR loci in Chinese Han population from Tianjin in Northern China, *Forensic Sci Int Genet* 27 (2017) 184-185.
- [15] J. Xie, C. Shao, Y. Zhou, W. Zhu, H. Xu, Z. Liu, et al., Genetic distribution on 20 STR loci from the Han population in Shanghai, China, *Forensic Sci Int Genet* 9 (2014) e30-31.
- [16] C. Yin, Q. Ji, K. Li, H. Mu, B. Zhu, J. Yan, et al., Analysis of 19 STR loci reveals genetic characteristic of eastern Chinese Han population, *Forensic Sci Int Genet* 14 (2015) 108-109.
- [17] M.X. Zhang, S.Y. Han, H.M. Gao, S.H. Sun, D.J. Xiao, Y. Liu, et al., Genetic polymorphisms of 19 STR loci in Shandong Han population, *Fa Yi Xue Za Zhi* 29 (2013) 440-443, 446.
- [18] J. Shen, H. Kang, F. Dong, J. Guo, R. Wang, Research of genetic polymorphism on 19 STR loci in Han nationality in Shanxi province and forensic medicine application, *Journal of Shanxi Police Academy* 23 (2015) 63-66.
- [19] J. Yao, K.Y. Xiong, Y. Zhang, Population data of 19 autosomal STR loci in the Chinese Han population from Jiujiang, Southern China, *Forensic Sci Int Genet* 28 (2017) e47-e48.
- [20] L. Huang, X. Chen, C. Xiang, S. Su, Y. Fan, B. Xu, Genetic Polymorphisms of 19 STR Loci in Yunnan Han Population, *CHIN J FOENSIC MED* 31 (2016) 187-191.
- [21] C. Xiang, L. Huang, S. Su, Y. Fan, J. Yu, Y. Huang, et al., Genetic variation of the 20 STRs in Han population from Yunnan-Kweichow plateau of China, *Forensic Sci Int Genet* 23 (2016) e10-11.
- [22] X. Jin, Y. Wei, J. Chen, T. Kong, Y. Mu, Y. Guo, et al., Phylogenic analysis and forensic genetic characterization of Chinese Uyghur group via autosomal multi STR markers, *Oncotarget* (2017).
- [23] G. He, P. Chen, B. Gao, Y. Han, X. Zou, F. Song, et al., Phylogenetic analysis among 27 Chinese populations and genetic polymorphisms of 20 autosomal STR loci in a Chinese Uyghur ethnic minority group, *Australian Journal of Forensic Sciences* (2017) 1-10.
- [24] L. Zhang, C. Xu, H. Chen, Y. Zhou, F. Li, J. Chen, Genetic polymorphism of 19 STR loci in Xinjiang Barkol Kazakh population, *Zhong Nan Da Xue Xue Bao Yi Xue Ban* 37 (2012) 934-938.
- [25] L. Zhao, S. Wu, F. Gu, Y. Zhang, X. Wang, A. Li, Genetic Polymorphisms of 19 STR Loci in Manchu population in Hebei Province, *CHIN J FOENSIC MED* 31 (2016) 72-73.
- [26] H. Shen, S. Yu, F. Guo, J. Yu, P. Jin, Z. Sun, et al., Genetic polymorphisms of 19 STR loci in Hui population in Liaoning province, *CHIN J FORENSIC MED* 28 (2013) 504-505.
- [27] S. Hu, W. Zhao, T. Wang, Genetic polymorphisms of 19 STR loci in Gansu Hui, *CHIN J FOENSIC MED* 30 (2015) 620-621.
- [28] Y. Li, Y. Hong, X. Li, J. Yang, L. Li, Y. Huang, et al., Allele frequency of 19 autosomal STR loci in the Bai population from the southwestern region of mainland China, *Electrophoresis* 36 (2015) 2498-2503.
- [29] X. Zhang, L. Hu, L. Du, A. Nie, M. Rao, J.B. Pang, et al., Genetic polymorphisms of 20 autosomal STR loci in the Vietnamese population from Yunnan Province, Southwest China, *Int J Legal Med* 131 (2017) 661-662.
- [30] X. Zhang, L. Hu, L. Du, A. Nie, M. Rao, J.B. Pang, et al., Genetic analysis of 20 autosomal STR loci in the Miao ethnic group from Yunnan Province, Southwest China, *Forensic Sci Int Genet* 28 (2017) e28-e29.

[31] X. Zhang, L. Hu, L. Du, H. Zheng, A. Nie, M. Rao, et al., Population data for 20 autosomal STR loci in the Yi ethnic minority from Yunnan Province, Southwest China, *Forensic Sci Int Genet* 28 (2017) e43-e44.

[32] X. Zhang, L. Du, Z. Huang, T. Gu, L. Hu, S. Nie, Genetic variation of 20 autosomal STR loci in three ethnic groups (Zhuang, Dai and Hani) in the Yunnan province of southwestern China, *Forensic Sci Int Genet* (2017).

[33] H. Meng, Y. Guo, Q. Dong, G. Yang, J. Yan, J. Shi, et al., Autosomal-STR based genetic structure of Chinese Xibe ethnic group and its relationships to various groups, *Int J Legal Med* 130 (2016) 1501-1503.

**Supplementary Table S12.** The detailed information and abbreviations of sample information of all involved populations.

| Geographic position  | Nationality | Sample size | Abbreviation |
|----------------------|-------------|-------------|--------------|
| Hainan               | Han         | 194         | HAH          |
| Sichuan(Liangshan)   | Yi          | 177         | SCY          |
| Sichuan(Liangshan)   | Tibetan     | 198         | SCT          |
| Tibet                | Tibetan     | 100         | TT           |
| Sichuan-1            | Han         | 653         | SCH-1        |
| Sichuan-2            | Han         | 2793        | SCH-2        |
| Sichuan-3            | Han         | 309         | SCH-3        |
| Chongqing            | Han         | 671         | CQH          |
| Gansu                | Han         | 217         | GSH          |
| Inner Mongolia       | Han         | 426         | IMH          |
| Hunan                | Han         | 741         | HNH          |
| Henan-1              | Han         | 585         | HEH-1        |
| Henan-2              | Han         | 274         | HEH-2        |
| Hubei-1              | Han         | 573         | HBH-1        |
| Hubei-2              | Han         | 3078        | HBH-2        |
| Jiangxi              | Han         | 597         | JXH          |
| Guangxi              | Han         | 754         | GXH          |
| Guangdong            | Han         | 1533        | GDH          |
| Guangdong(Guangzhou) | Han         | 3940        | GZH          |
| Guangdong(Dongguan)  | Han         | 487         | DGH          |
| Guangdong(Foshan)    | Han         | 955         | FSH          |
| Guangdong(Jiangmen)  | Han         | 1191        | JMH          |
| Guangdong(Maoming)   | Han         | 420         | MMH          |
| Guangdong(Qingyuan)  | Han         | 1177        | QYH          |
| Guangdong(Yangjiang) | Han         | 1595        | YJH          |
| Guangdong(Zhanjiang) | Han         | 454         | ZJH          |
| Guangdong(Zhaoqing)  | Han         | 1283        | ZQH          |
| Guangdong(Zhongshan) | Han         | 687         | ZSH          |
| Minnan               | Han         | 351         | MNH          |
| Minxi                | Han         | 600         | MXH          |
| Xiamen               | Han         | 5141        | XMH          |
| Beijing              | Han         | 200         | BJH          |
| Tianjin              | Han         | 565         | TJH          |
| Shanghai             | Han         | 676         | SHH          |
| Jiangsu(Huaian)      | Han         | 137         | HUH          |
| Jiangsu(Yangzhou)    | Han         | 184         | YZH          |
| Jiangsu(Taizhou)     | Han         | 115         | TZH          |
| Anhui(Suzhou)        | Han         | 200         | SZH          |
| Shandong             | Han         | 205         | SDH          |
| Shanxi               | Han         | 554         | SXH          |
| Jiangxi(Jiujiang)    | Han         | 5318        | JJH          |
| Yunnan               | Han         | 2384        | YNH          |
| Yungui               | Han         | 2490        | YGH          |
| Taiwan               | Han         | 775         | TWH          |
| Xinjiang-1           | Uyghur      | 1218        | XJU-1        |
| Xinjiang-2           | Uyghur      | 214         | XJU-2        |
| Xinjiang-3           | Uyghur      | 100         | XJU-3        |
| Xinjiang             | Kazakh      | 81          | XJK          |

|                |            |      |      |
|----------------|------------|------|------|
| Hebei(Chengde) | Manchu     | 423  | HBM  |
| Liaoning       | Hui        | 225  | LNH  |
| Gansu          | Hui        | 226  | GSHU |
| Yunnan         | Bai        | 1158 | YNB  |
| Yunan          | Vietnamese | 522  | YNV  |
| Yunnan         | Miao       | 748  | YNM  |
| Yunnan         | Yi         | 559  | YNY  |
| Yunan          | Zhuang     | 242  | YNZ  |
| Yunan          | Dai        | 116  | YND  |
| Yunnan         | Hani       | 170  | YNHN |
| Yili           | Xibe       | 222  | YLX  |

---
